# Supplementary material for: Interactions between Antarctic sea ice and large-scale atmospheric modes in CMIP5 models
Source: Copernicus journal article supplement (doi:10.5194/tc-11-789-2017), 2017-03-24

# EOFs of SLP - ACCESS1-0\_r1i1p1

SAM - Advance

38.57%

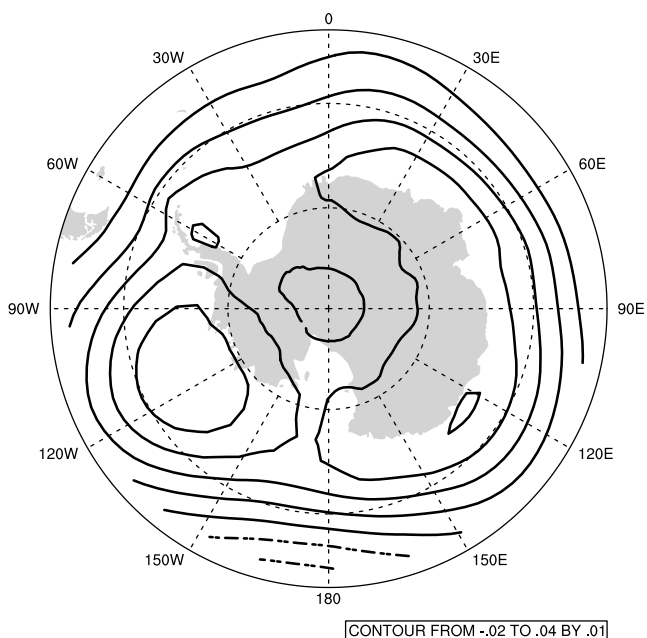

SAM - Retreat

45.53%

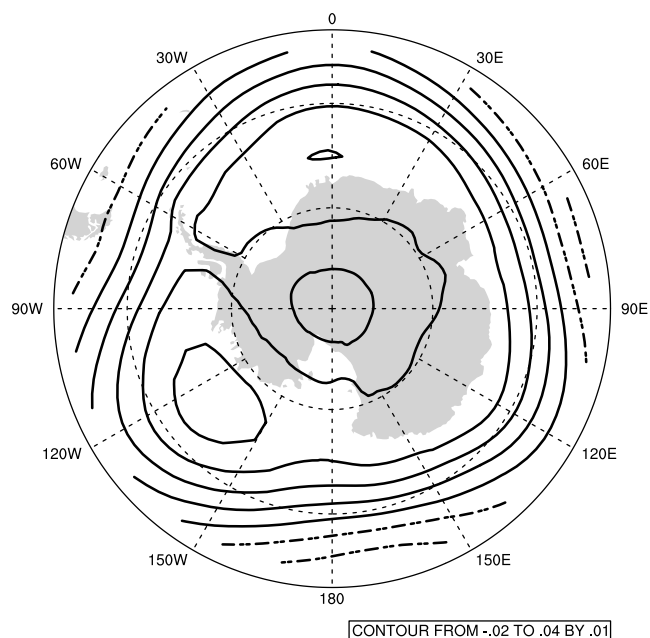

PSA - Advance

24.3%

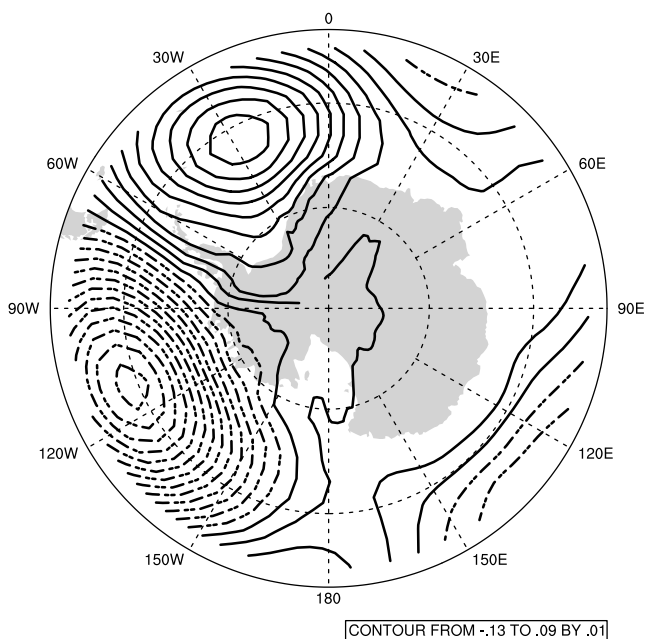

PSA - Retreat

19.44%

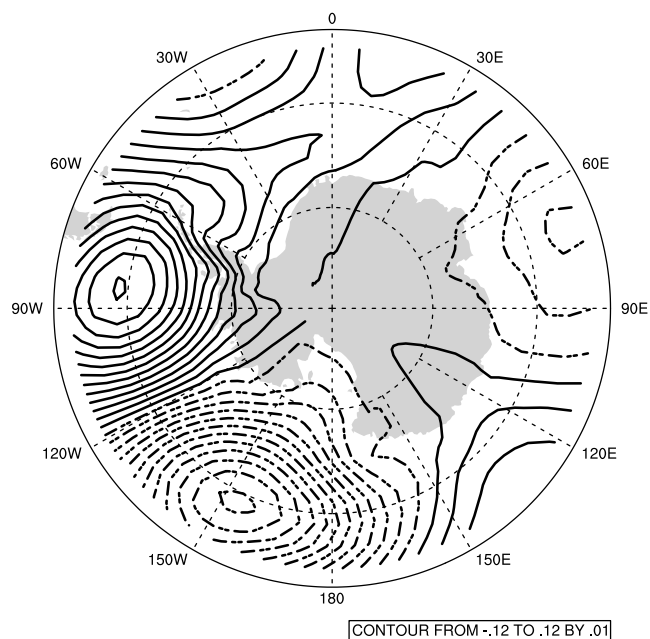

# EOFs of SLP - ACCESS1-0\_r2i1p1

SAM - Advance

40.59%

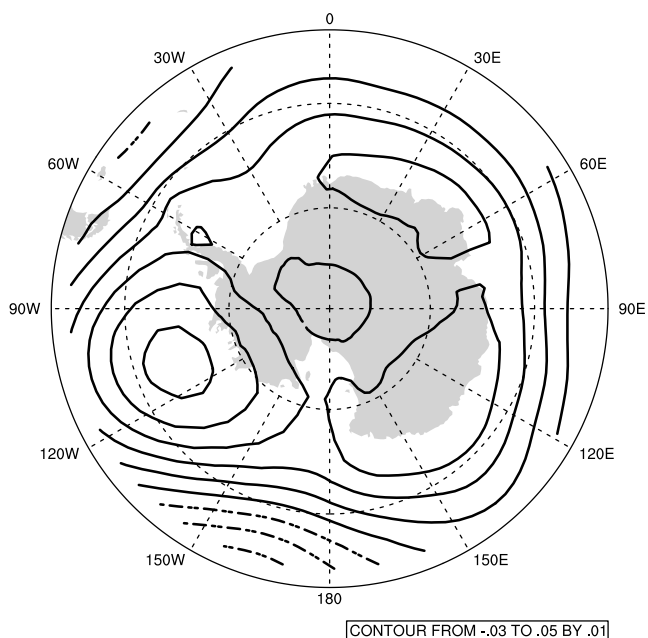

SAM - Retreat

44.46%

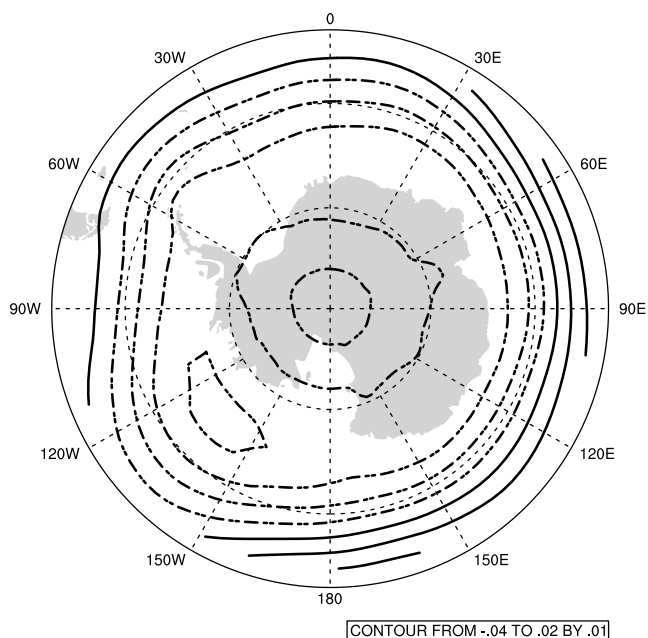

PSA - Advance

27.13%

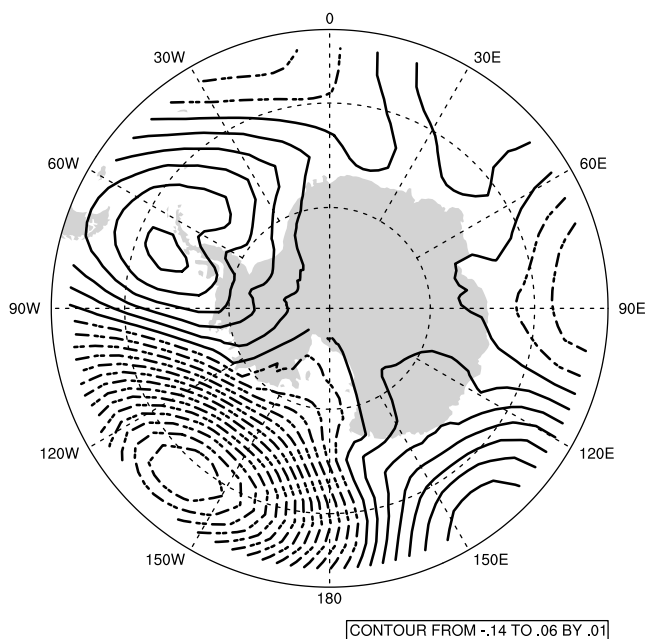

PSA - Retreat

20.92%

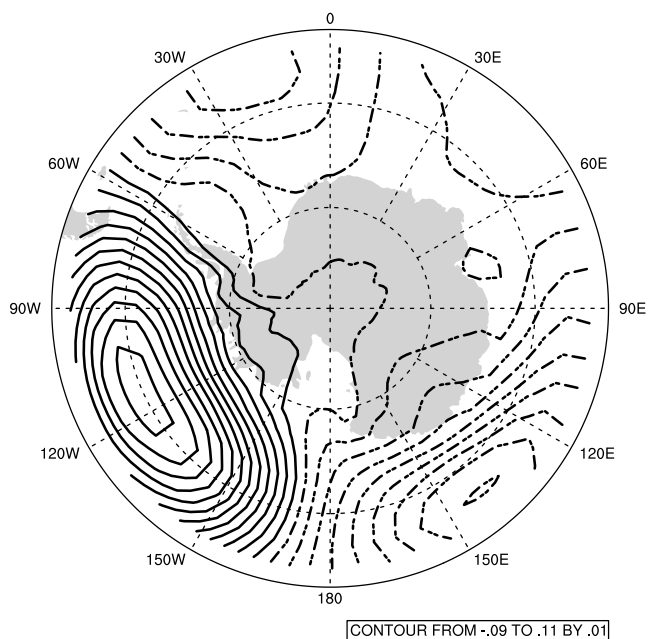

# EOFs of SLP - ACCESS1-0\_r3i1p1

SAM - Advance

41.34%

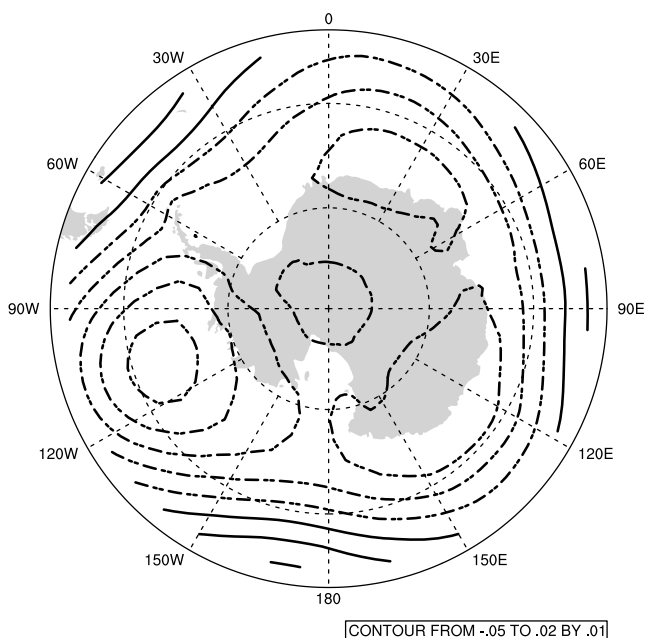

SAM - Retreat

42.25%

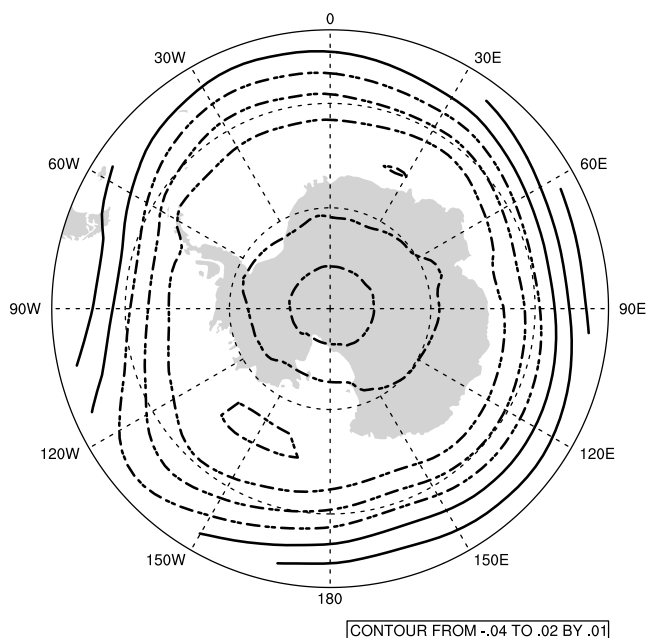

PSA - Advance

26.75%

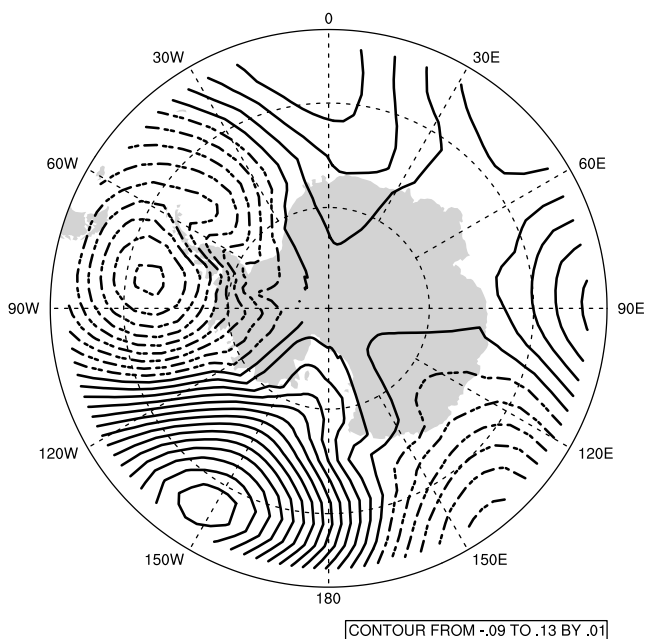

PSA - Retreat

22.45%

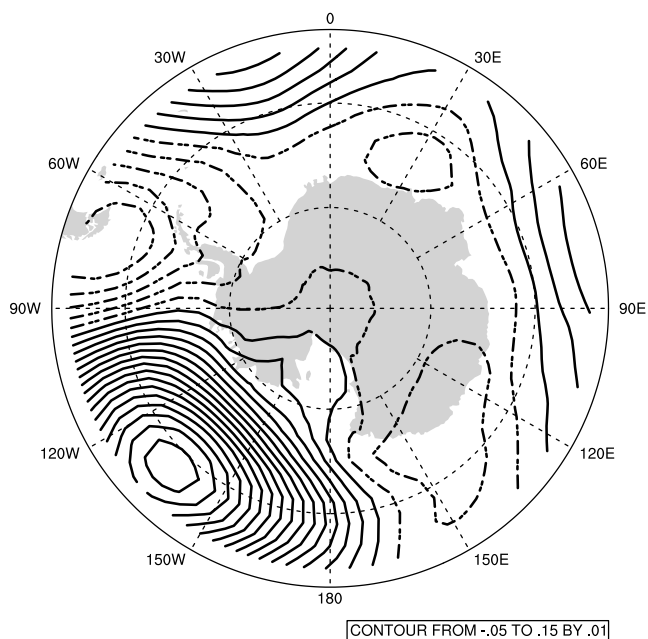

# EOFs of SLP - ACCESS1-3\_r1i1p1

SAM - Advance

34.83%

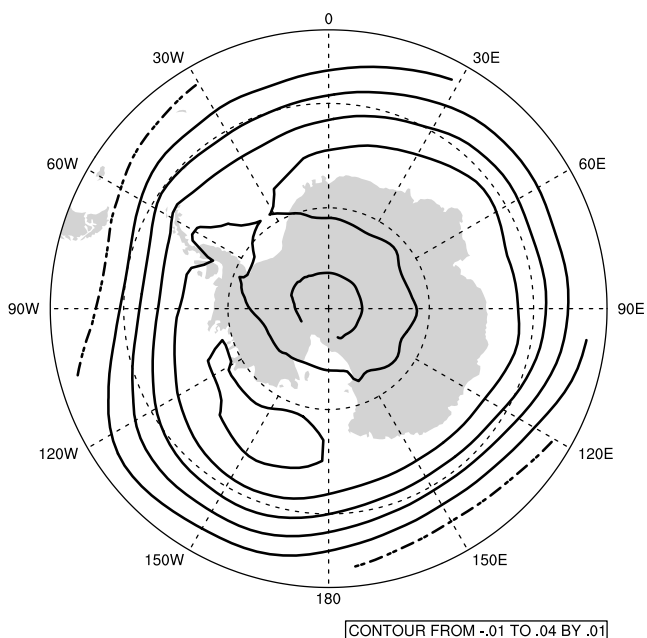

SAM - Retreat

54.9%

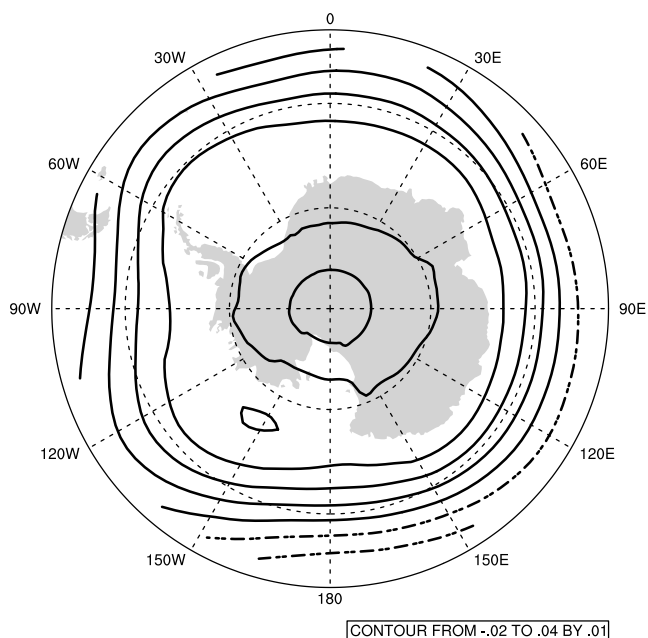

PSA - Advance

26.46%

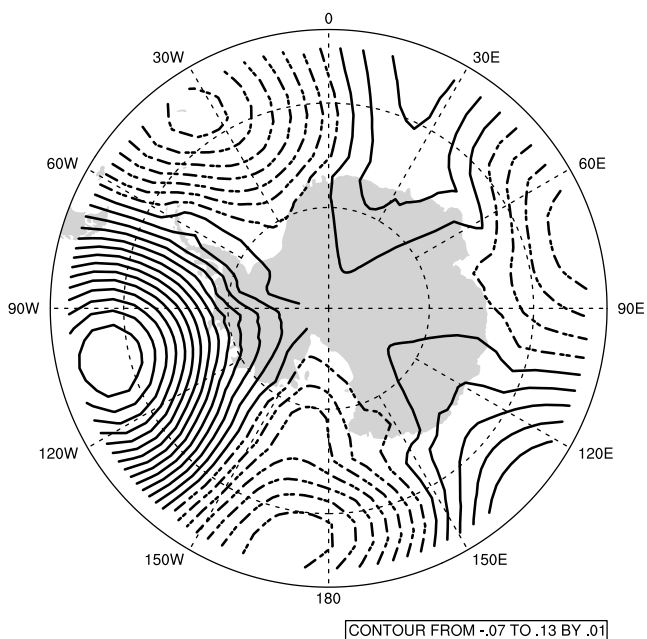

PSA - Retreat

16.75%

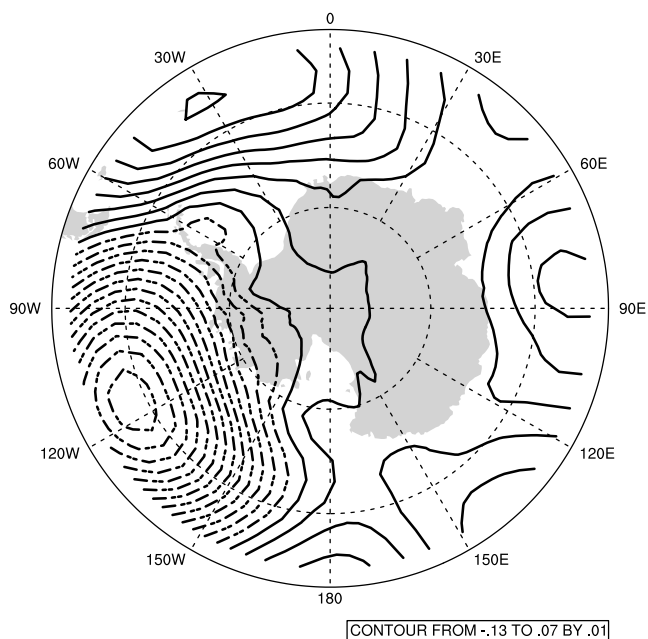



# EOFs of SLP - ACCESS1-3\_r2i1p1

SAM - Advance

31.18%

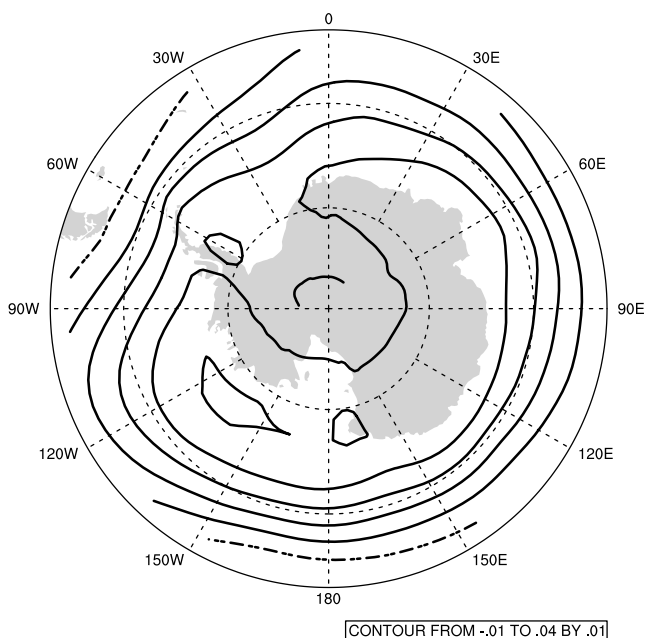

SAM - Retreat

40.24%

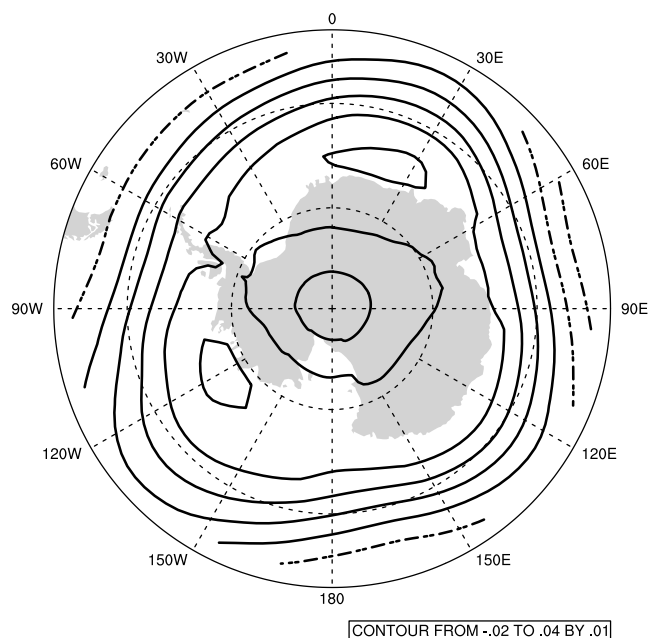

PSA - Advance

27.02%

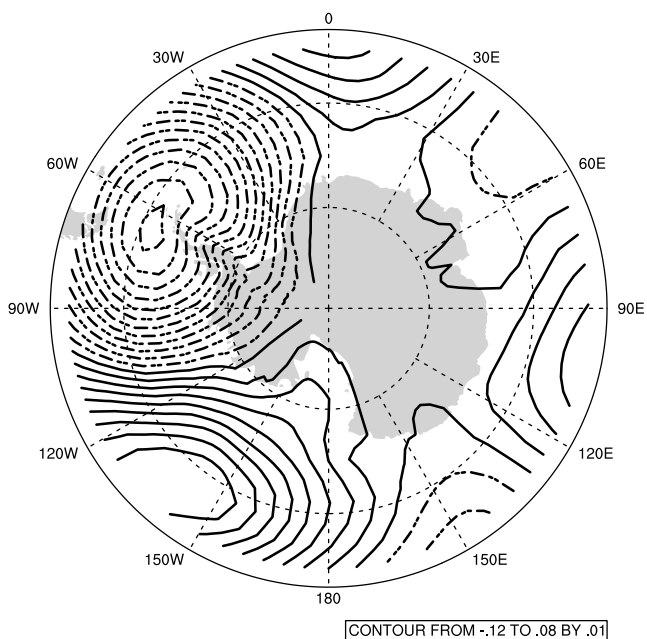

PSA - Retreat

23.58%

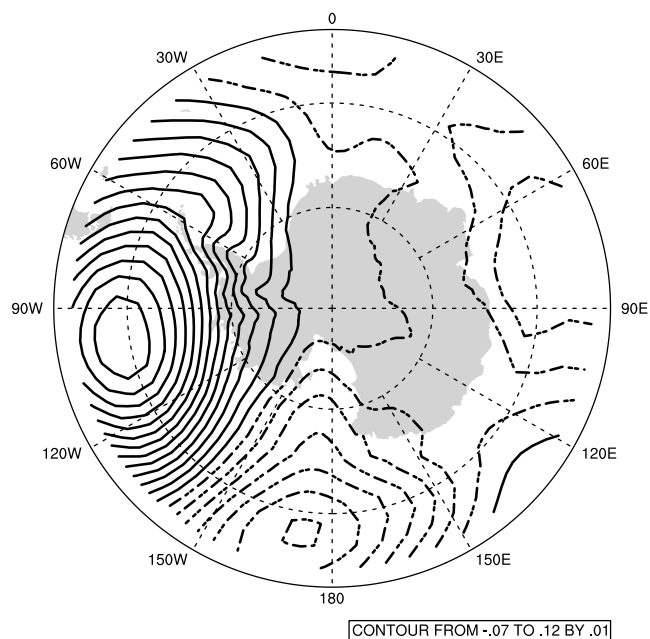

# EOFs of SLP - ACCESS1-3\_r3i1p1

SAM - Advance

32.65%

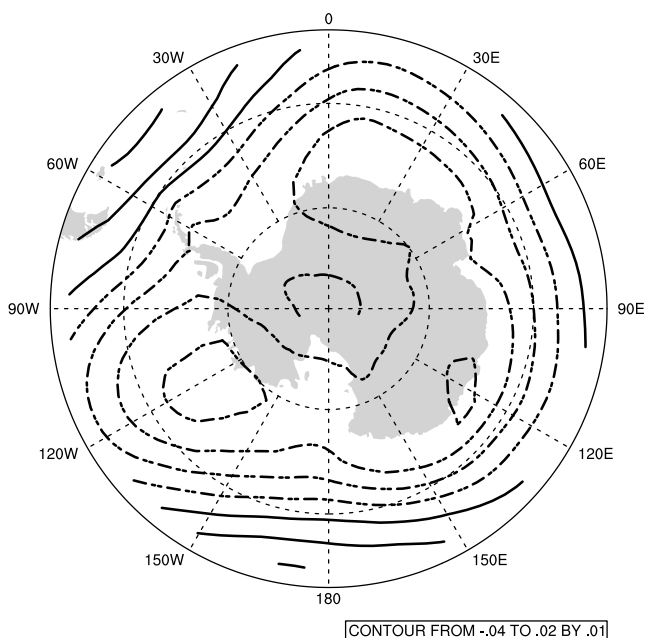

SAM - Retreat

49.53%

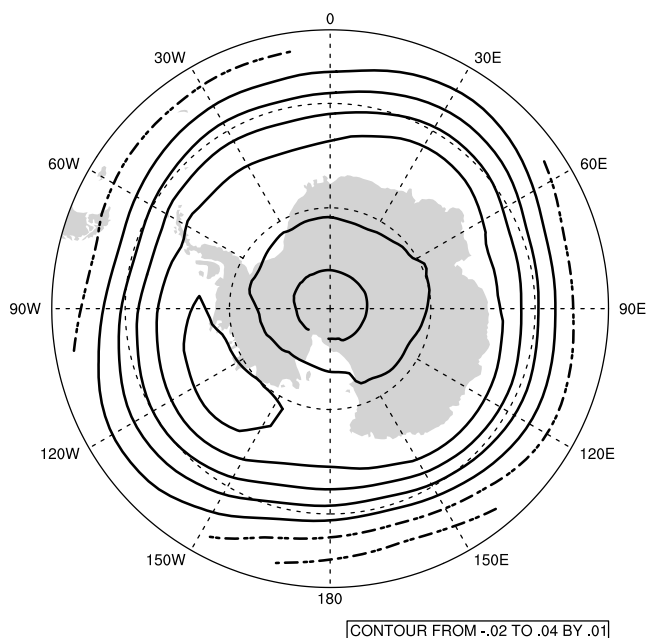

PSA - Advance

27.35%

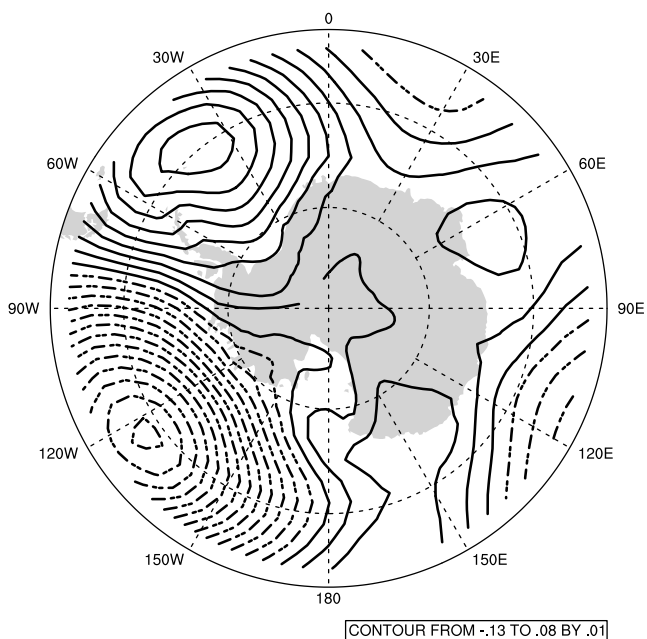

PSA - Retreat

18.46%

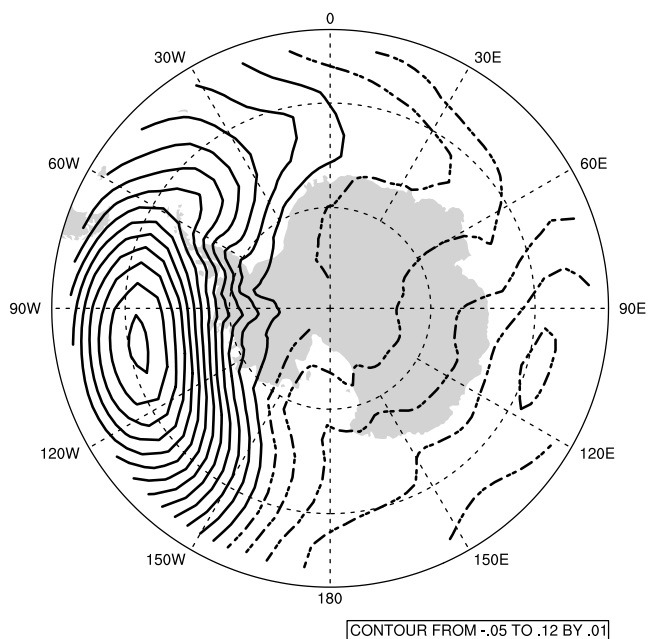

# EOFs of SLP - BCC-CSM1-1\_r1i1p1

SAM - Advance

31.13%

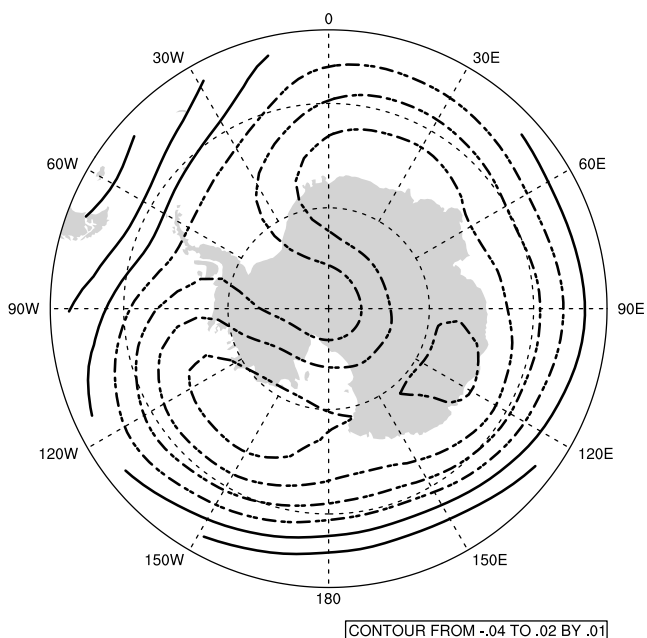

SAM - Retreat

57.6%

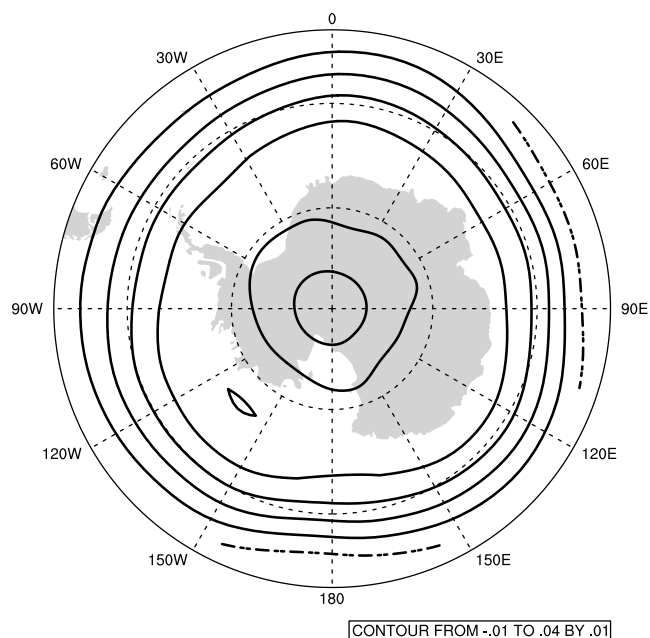

PSA - Advance

32.83%

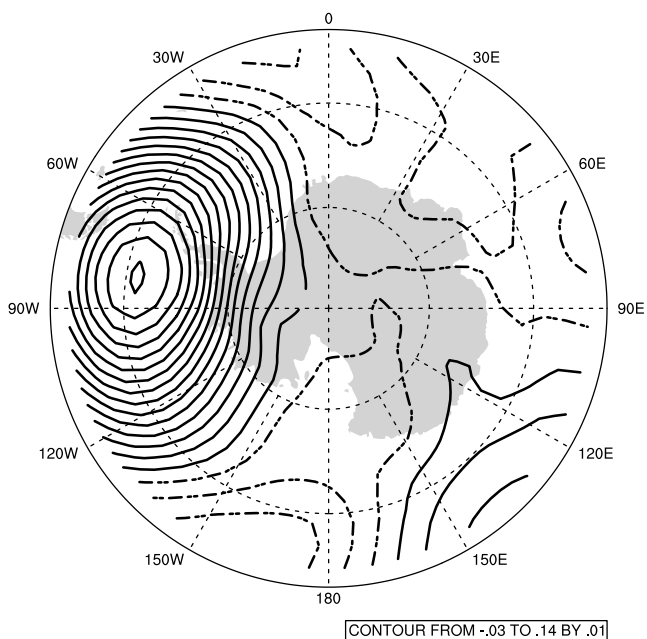

PSA - Retreat

18.84%

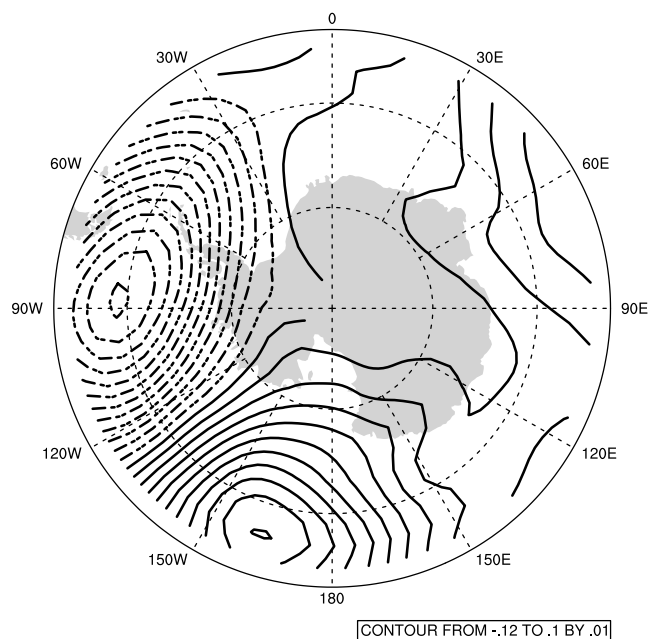

# EOFs of SLP - BCC-CSM1-1\_r2i1p1

SAM - Advance

33.07%

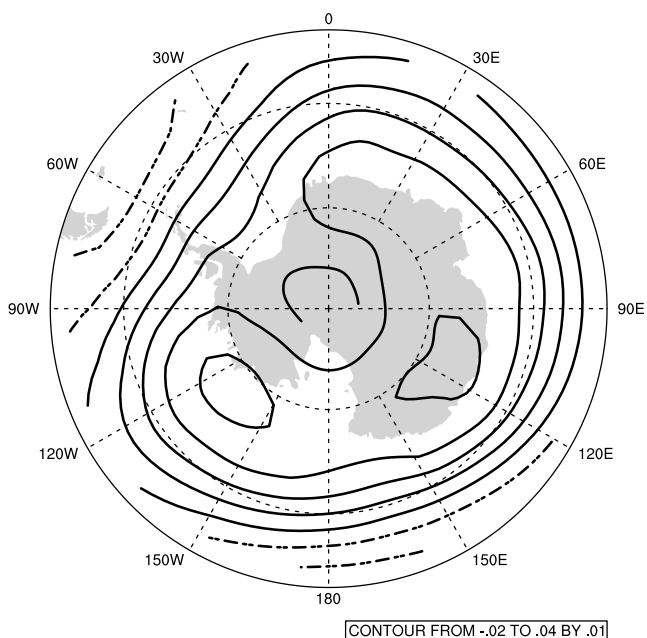

SAM - Retreat

50.11%

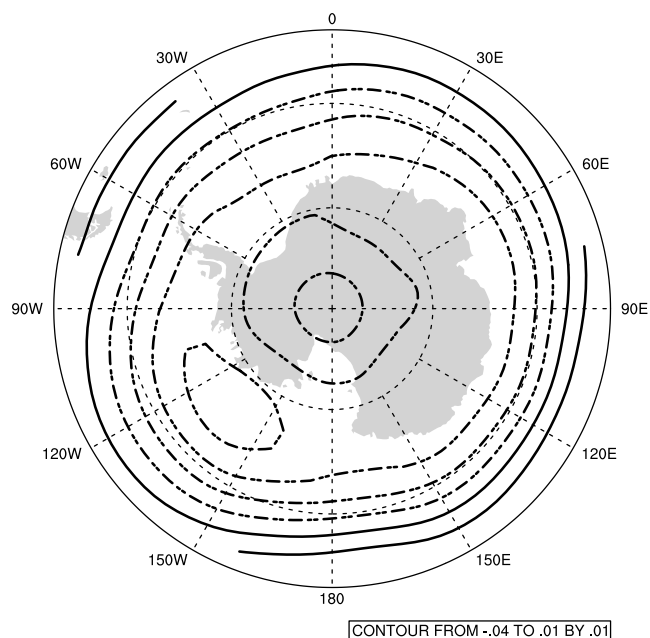

PSA - Advance

28.66%

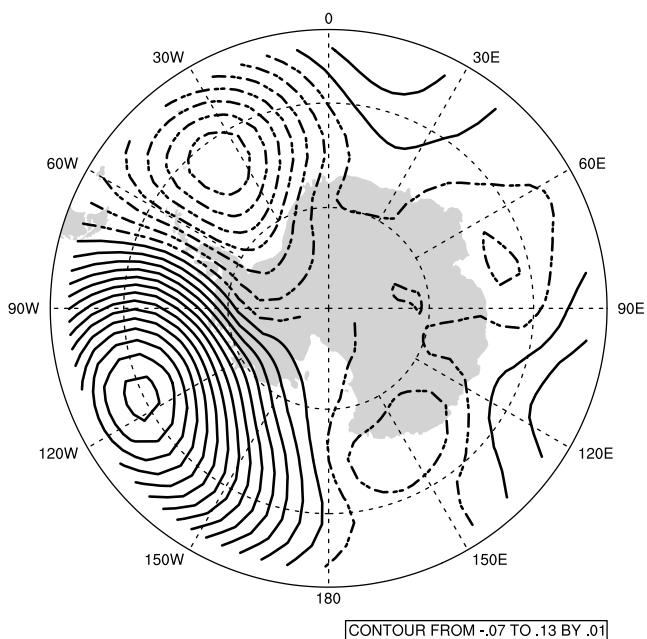

PSA - Retreat

18.97%

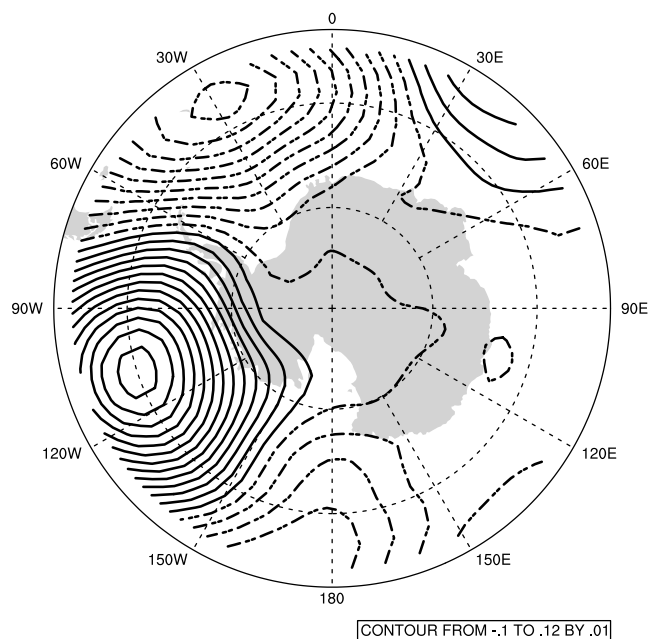

## EOFs of SLP - BCC-CSM1-1\_r3i1p1

SAM - Advance

37.43%

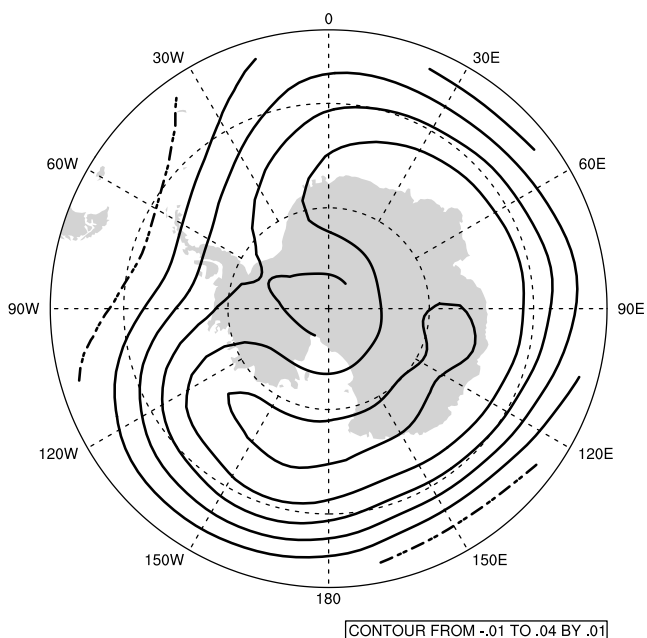

SAM - Retreat

39.95%

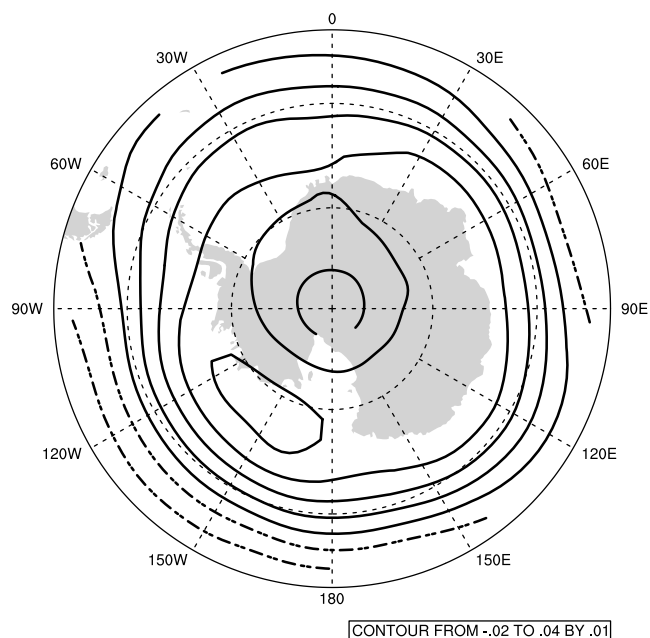

PSA - Advance

25.65%

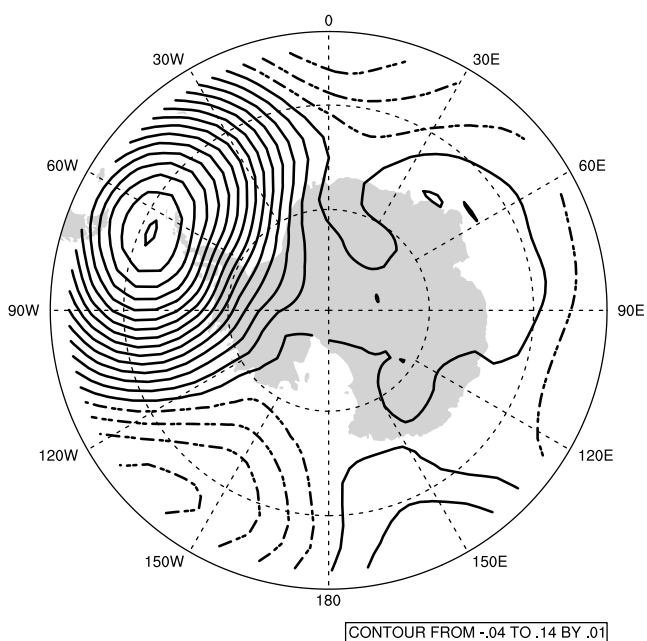

PSA - Retreat

22.98%

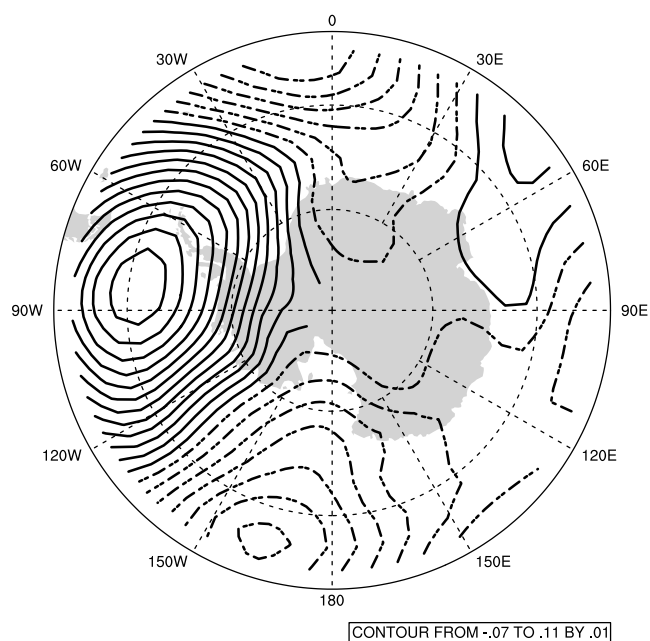

## EOFs of SLP - CCSM4\_r1i1p1

SAM - Advance

34%

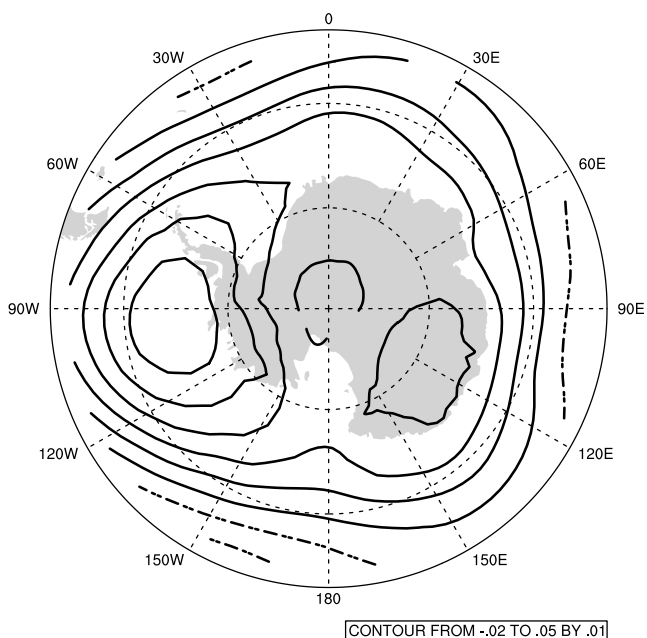

SAM - Retreat

40.01%

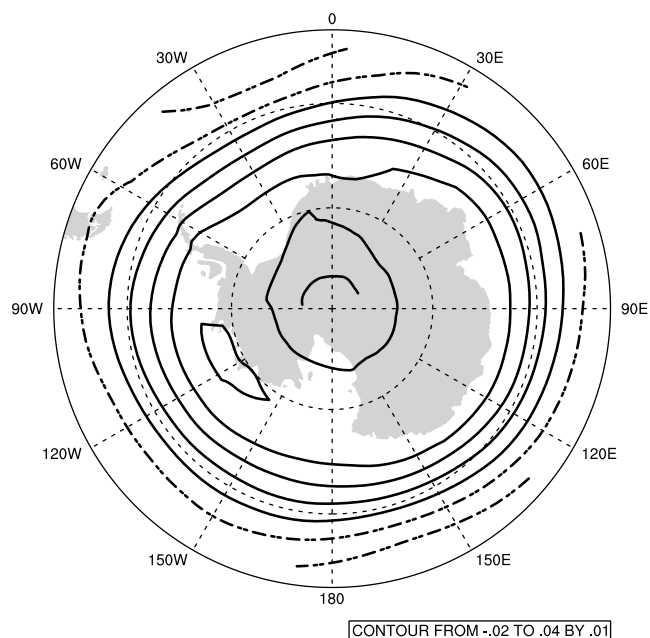

PSA - Advance

31.83%

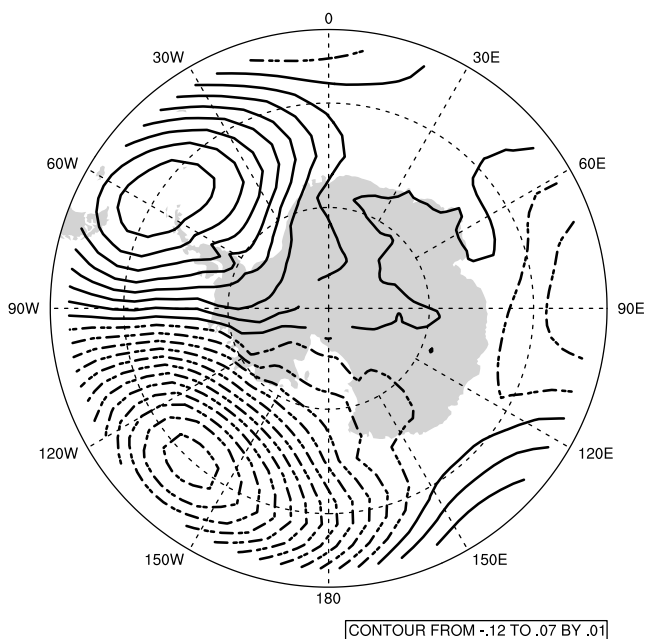

PSA - Retreat

22.43%

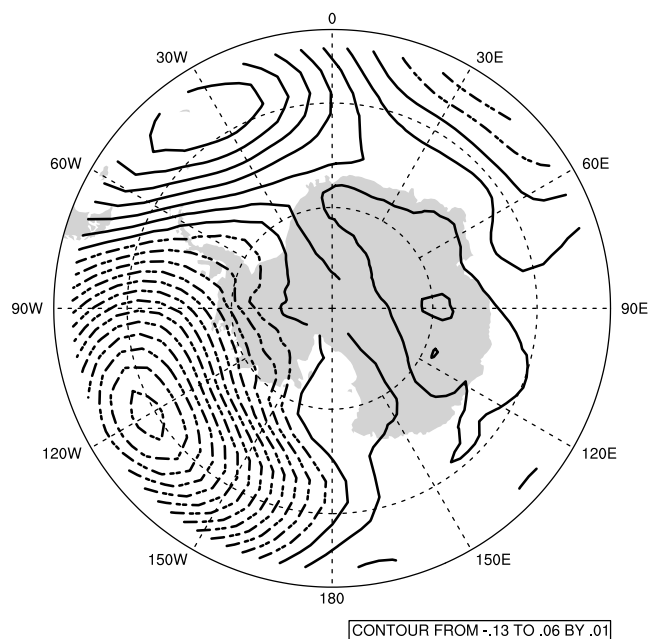

## EOFs of SLP - CCSM4\_r1i2p1

SAM - Advance

33.76%

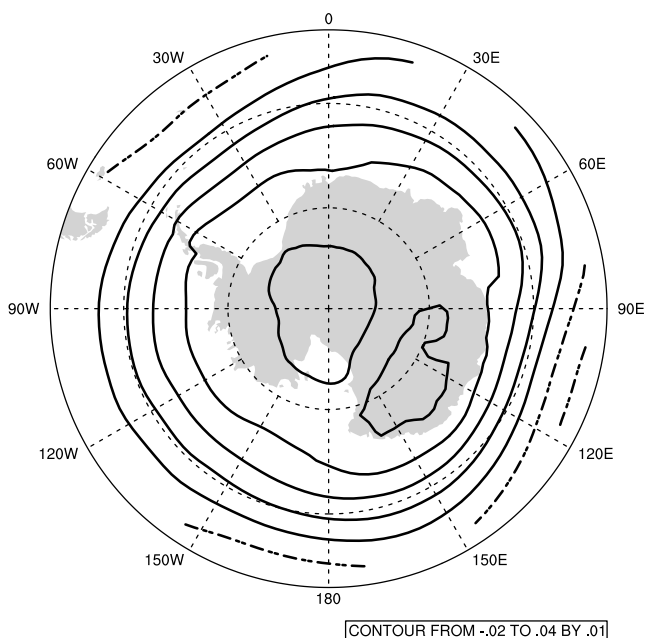

SAM - Retreat

41.71%

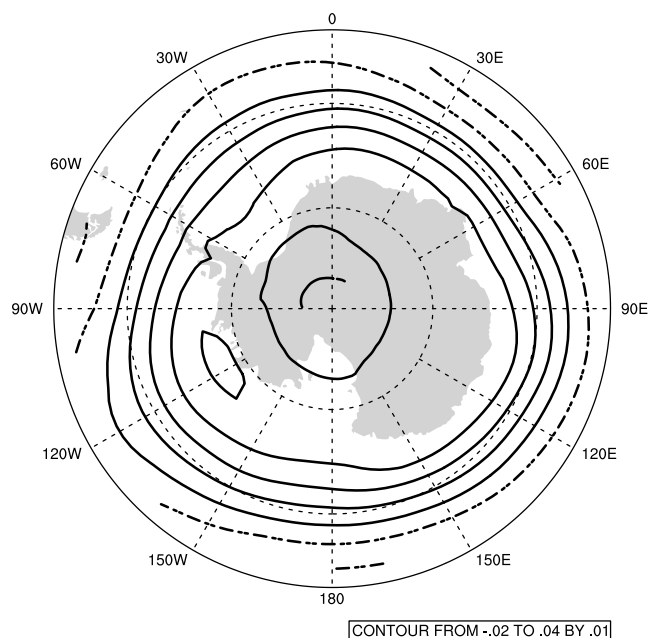

PSA - Advance

26.86%

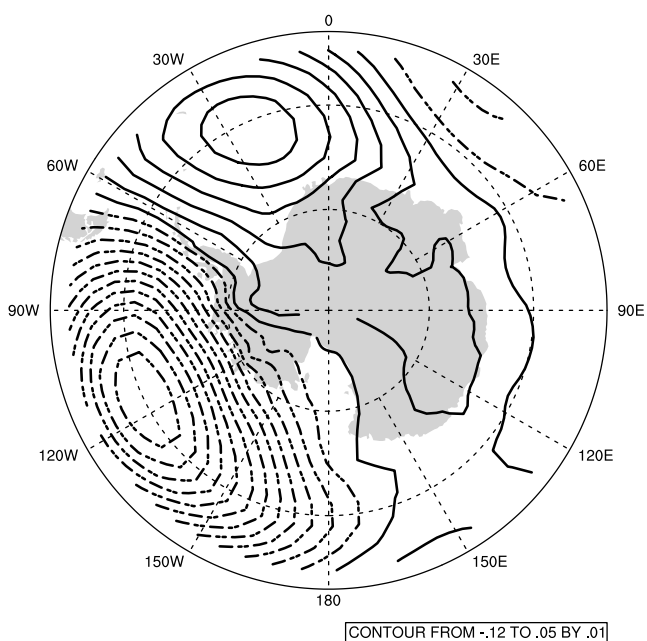

PSA - Retreat

22.32%

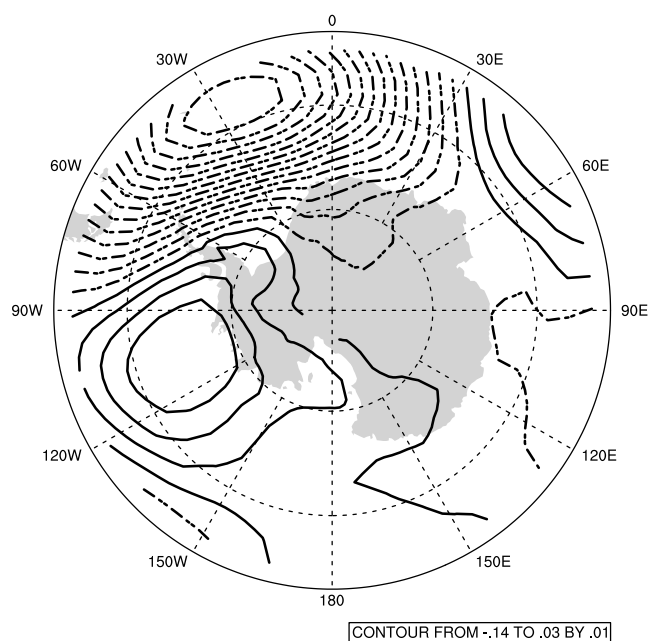

## EOFs of SLP - CCSM4\_r1i2p2

SAM - Advance

30.09%

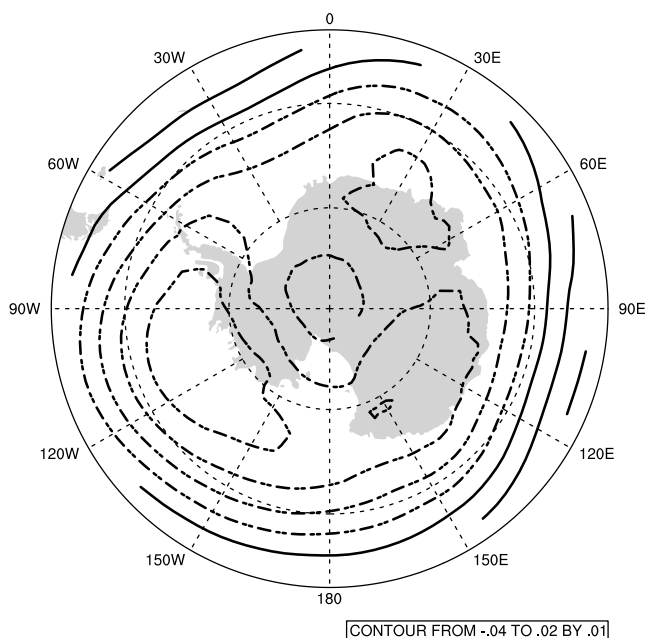

SAM - Retreat

38.08%

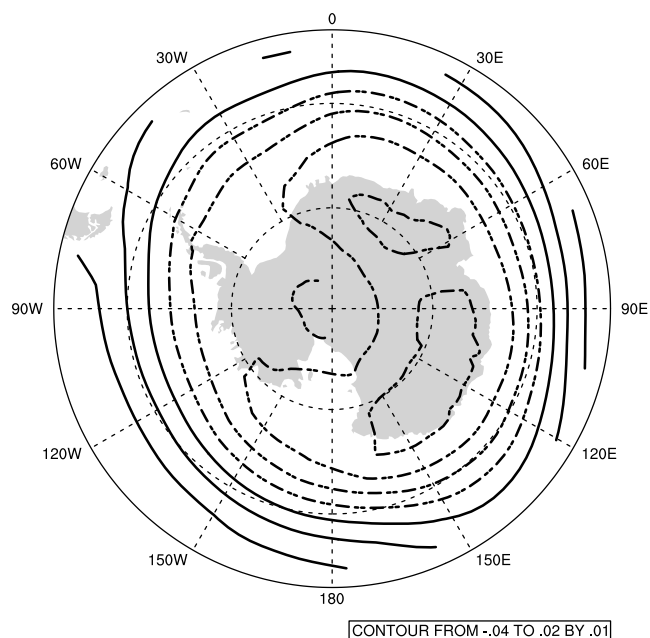

PSA - Advance

31.71%

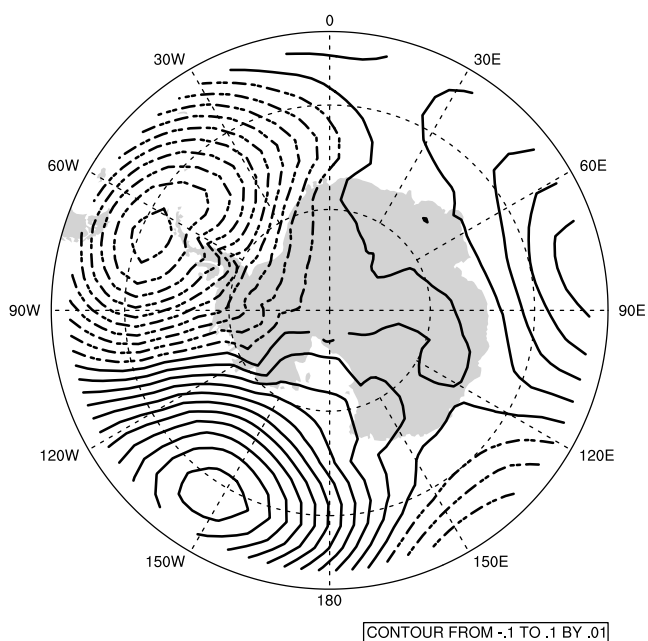

PSA - Retreat

23.02%

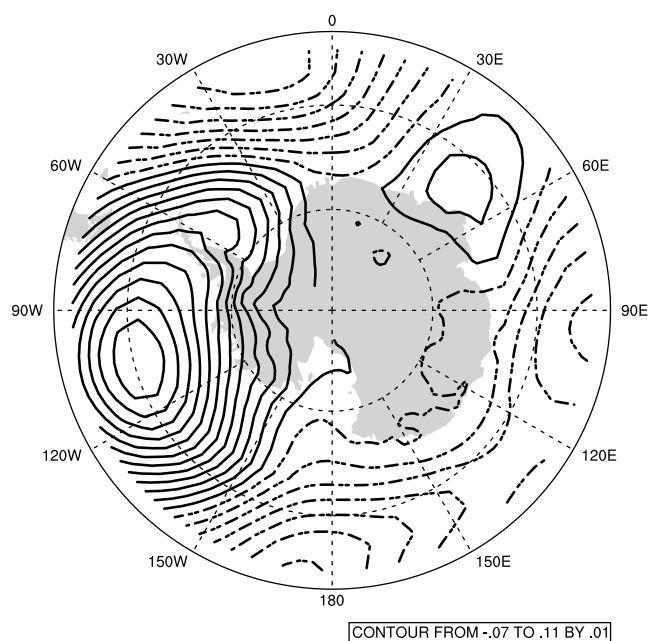



## EOFs of SLP - CCSM4\_r2i1p1

SAM - Advance

33.7%

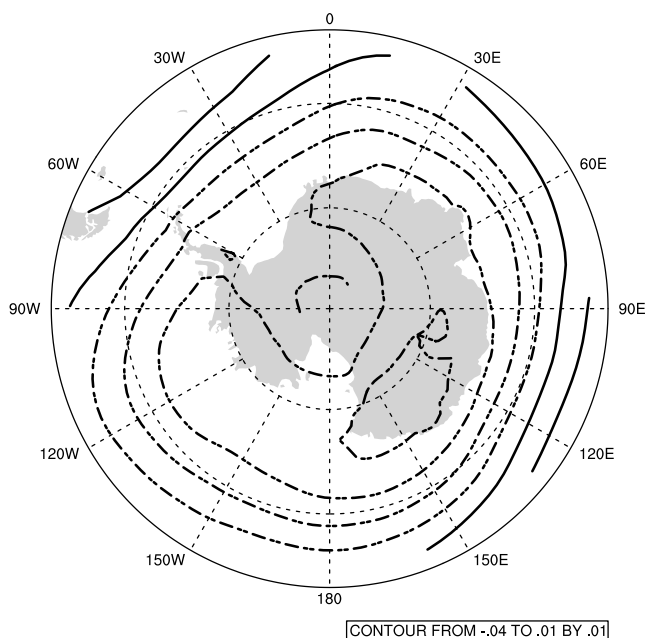

SAM - Retreat

42.76%

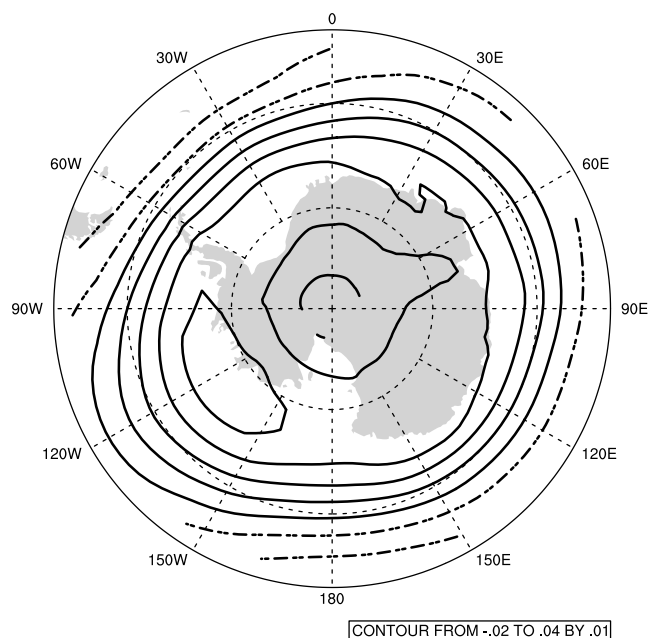

PSA - Advance

28.62%

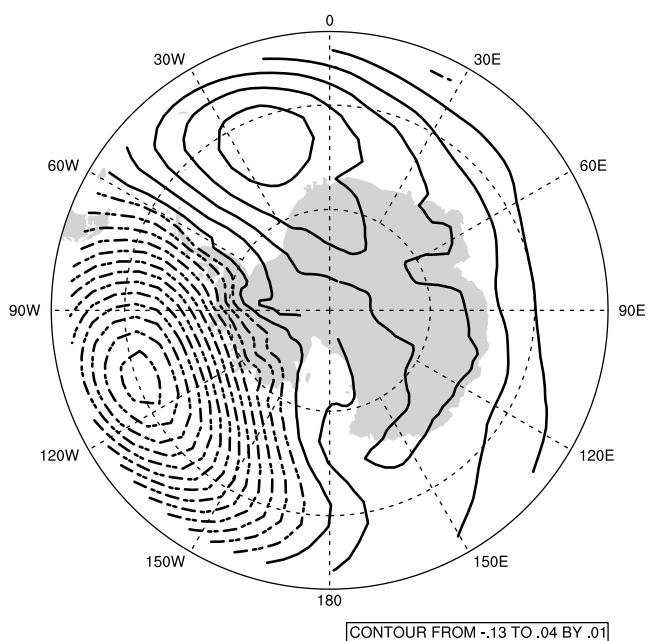

PSA - Retreat

21.8%

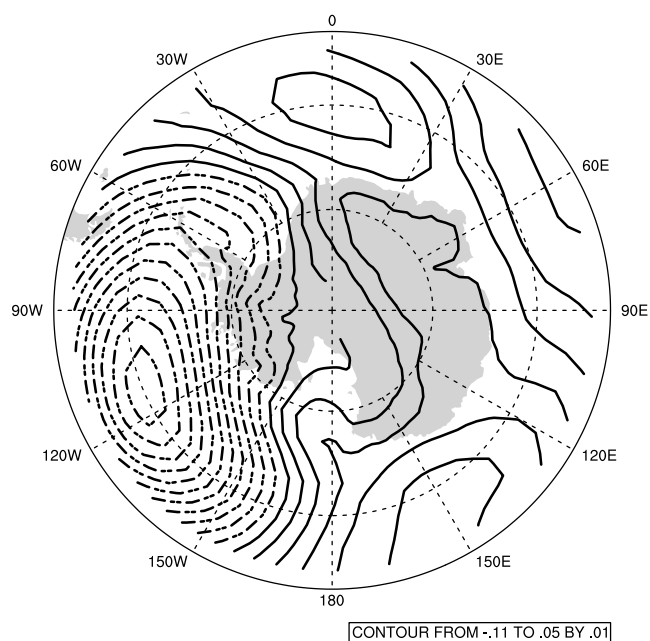

## EOFs of SLP - CCSM4\_r3i1p1

SAM - Advance

36.55%

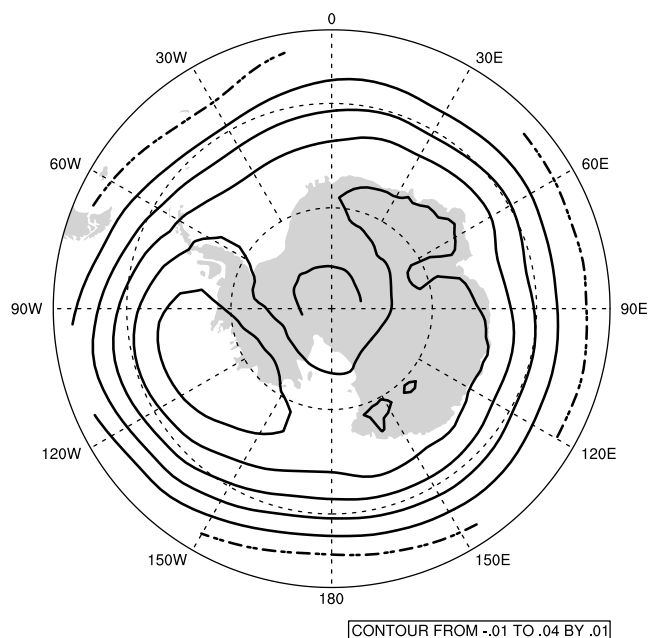

SAM - Retreat

51.19%

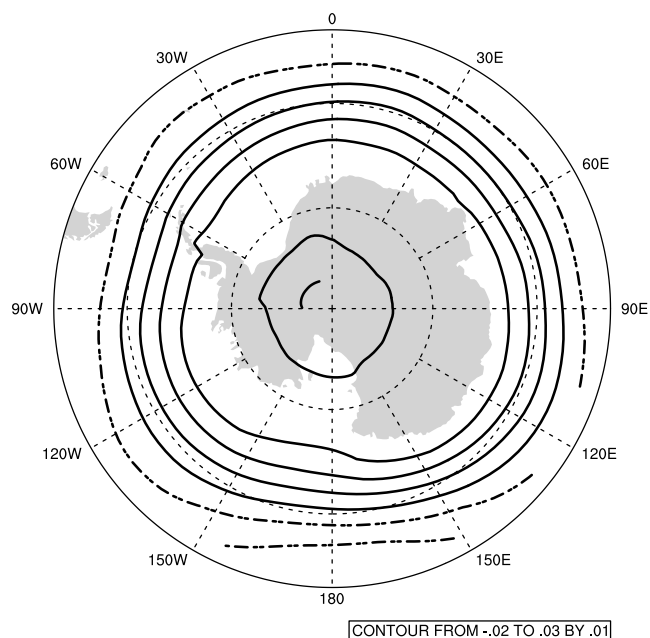

PSA - Advance

31.01%

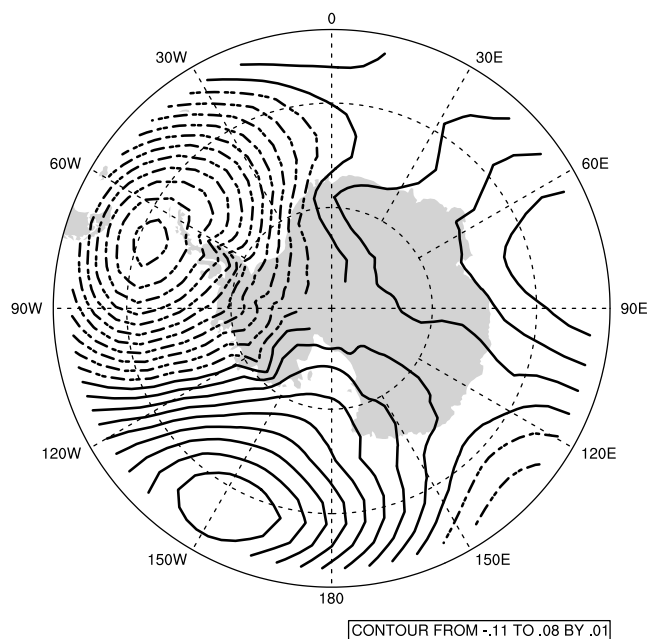

PSA - Retreat

18.99%

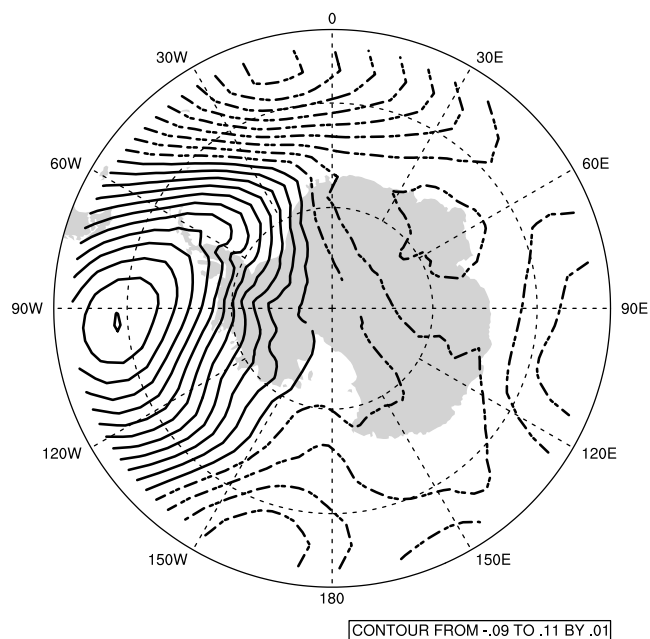

# EOFs of SLP - CCSM4\_r4i1p1

SAM - Advance

33.65%

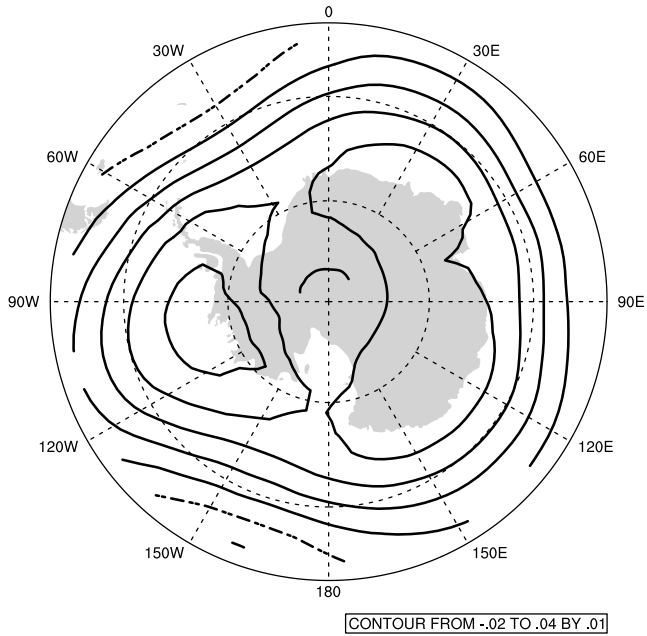

SAM - Retreat

44.54%

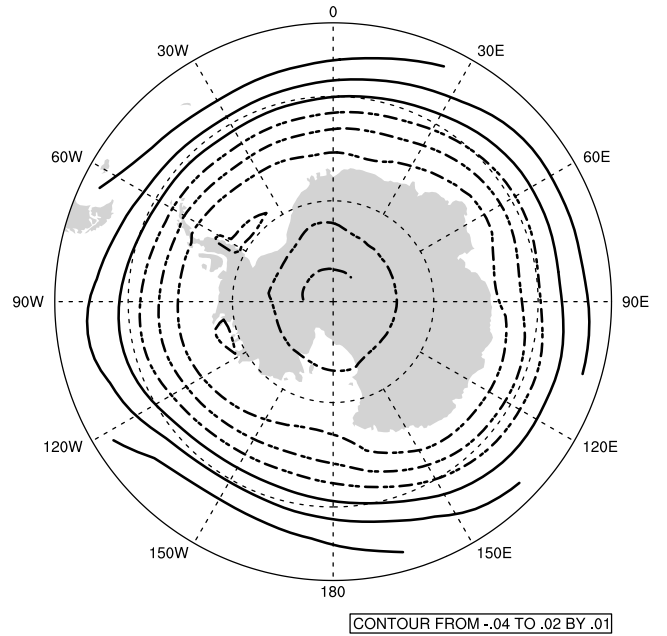

PSA - Advance

29.67%

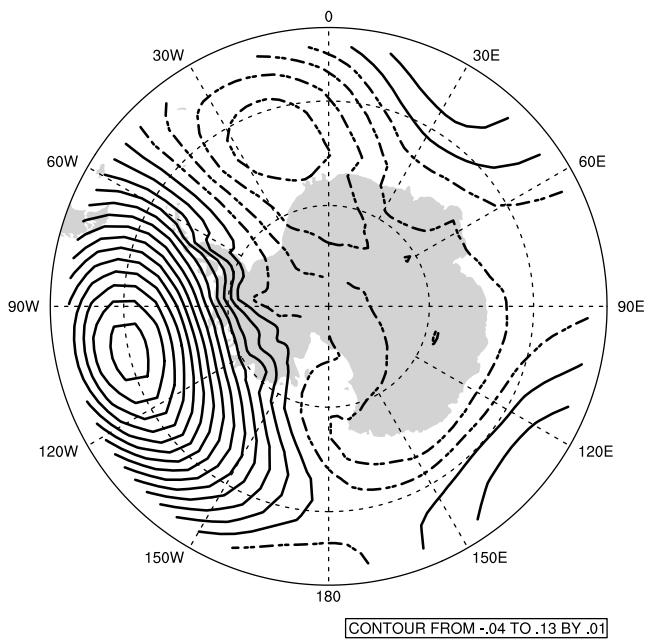

PSA - Retreat

19.65%

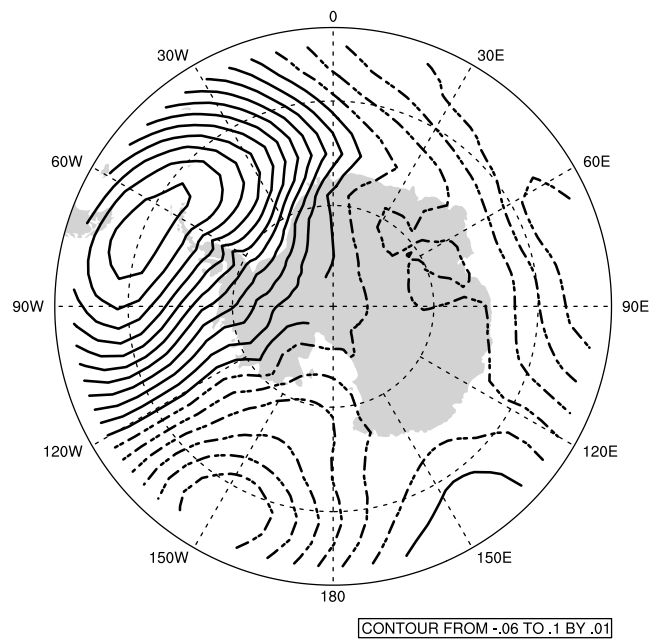

## EOFs of SLP - CCSM4\_r5i1p1

SAM - Advance

41.37%

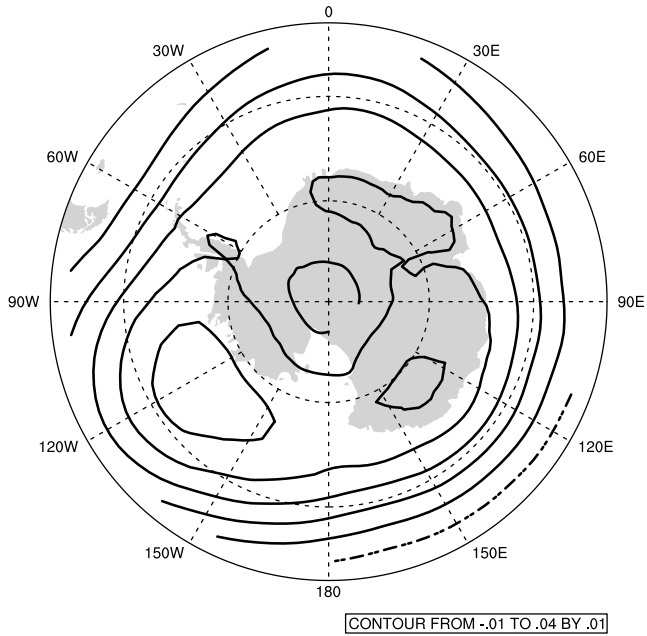

SAM - Retreat

39.32%

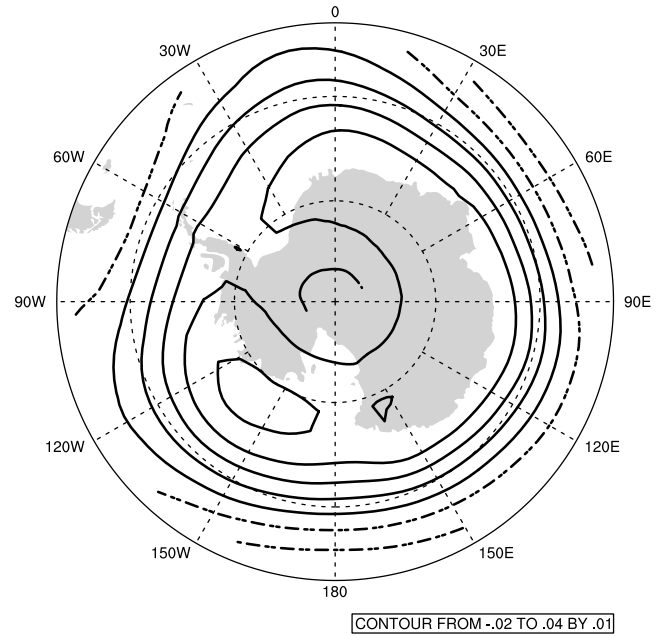

PSA - Advance

26.69%

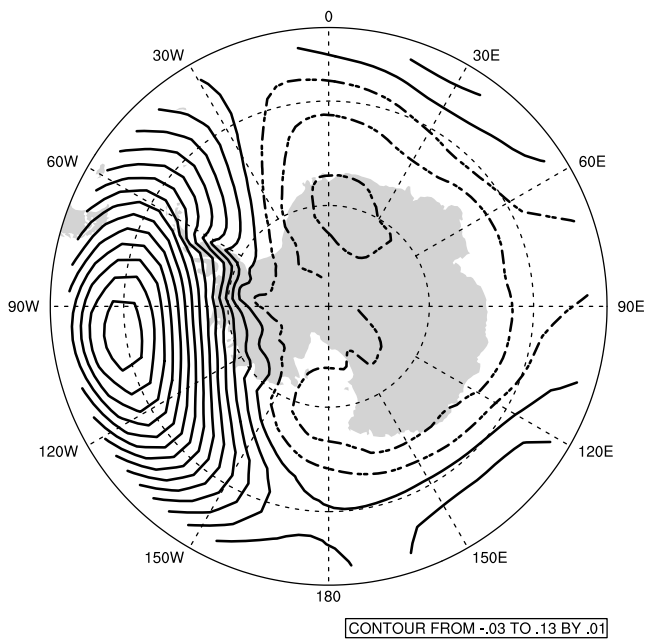

PSA - Retreat

23.15%

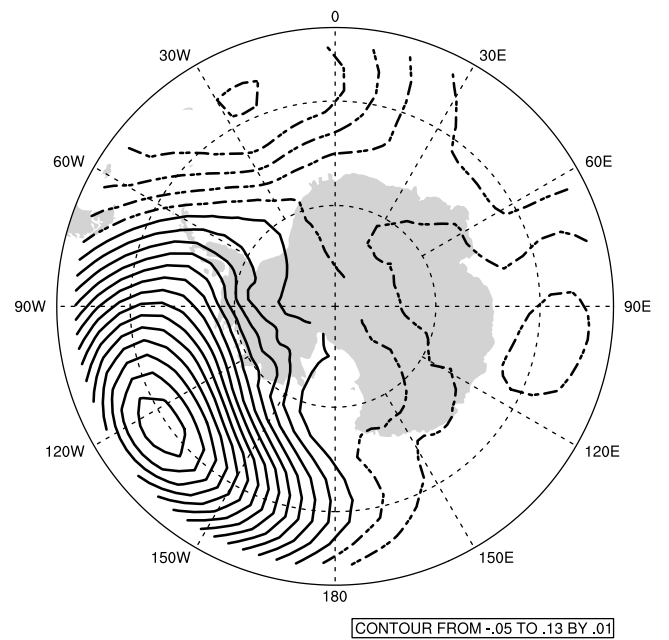

## EOFs of SLP - CCSM4\_r6i1p1

SAM - Advance

32.72%

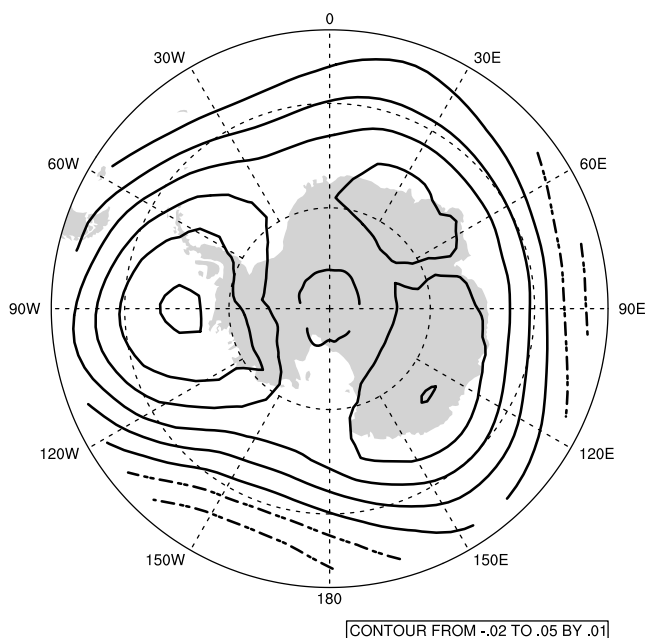

SAM - Retreat

45.55%

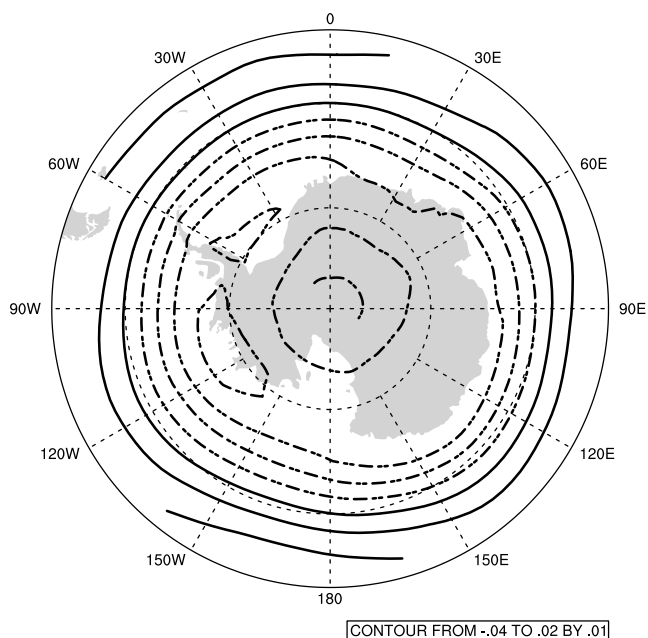

PSA - Advance

31.56%

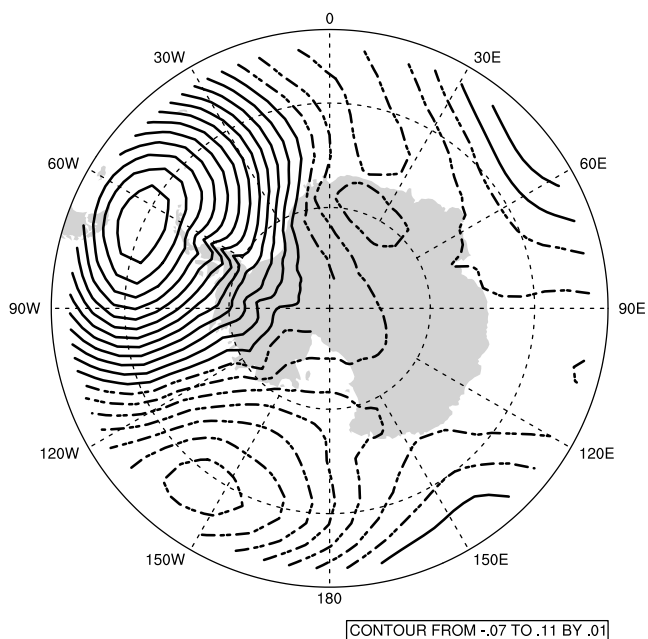

PSA - Retreat

20.69%

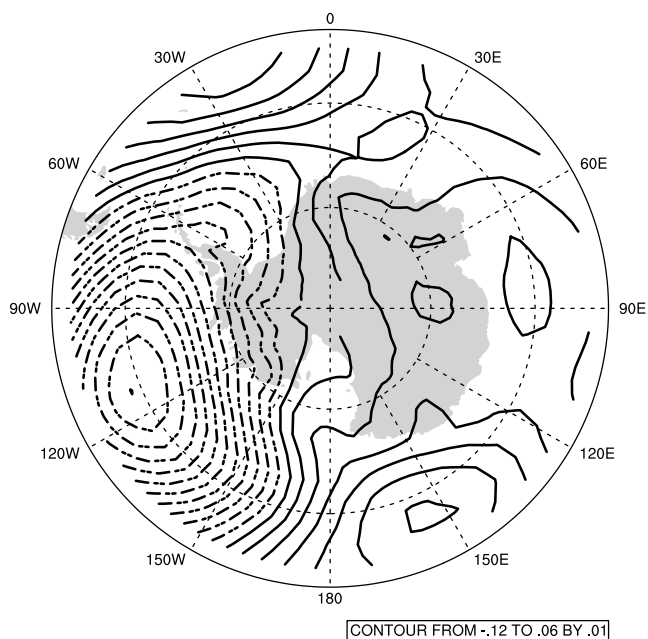

# EOFs of SLP - CESM1-CAM5\_r1i1p1

SAM - Advance

35.24%

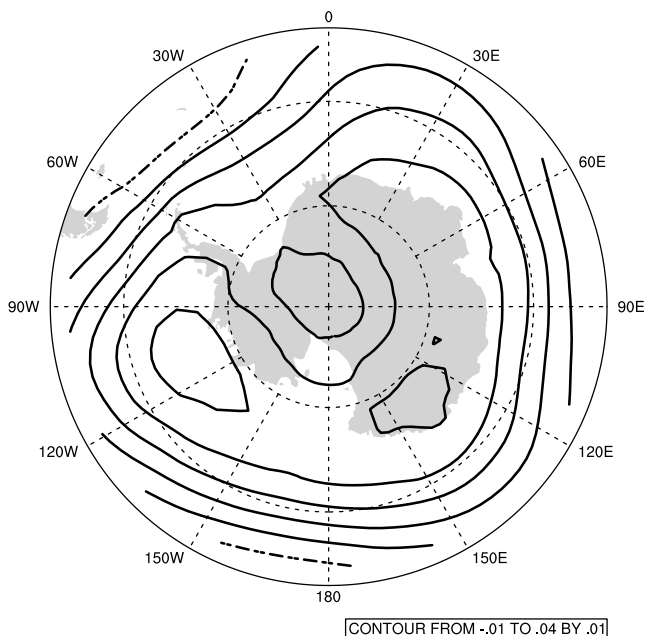

SAM - Retreat

47.5%

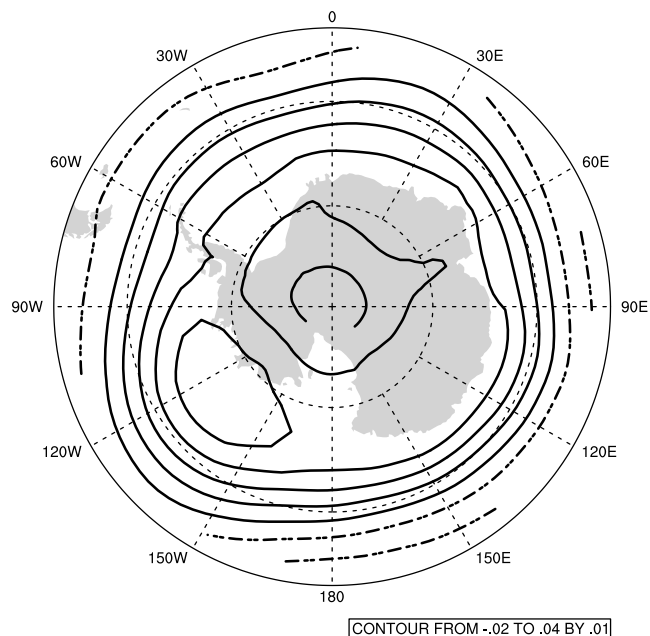

PSA - Advance

26.77%

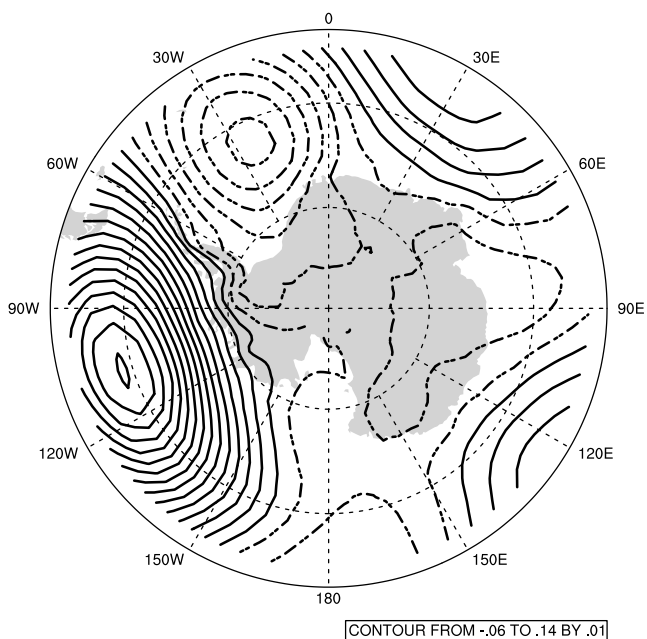

PSA - Retreat

21.3%

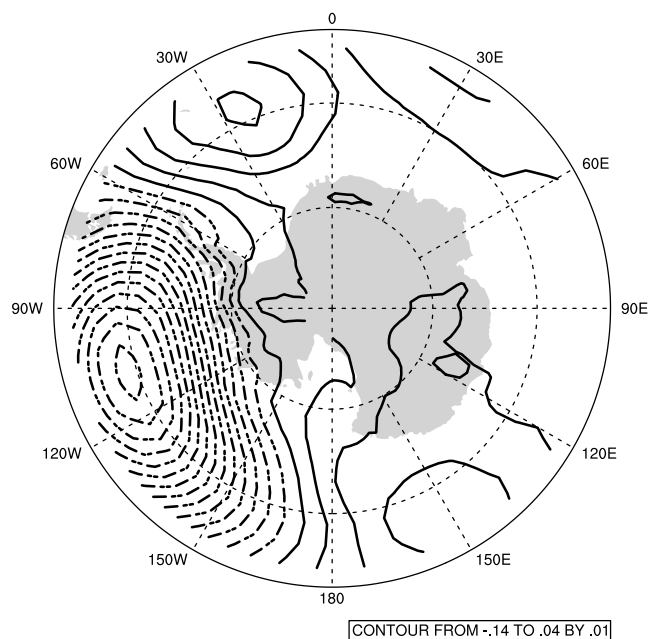

# EOFs of SLP - CESM1-CAM5\_r2i1p1

SAM - Advance

35.6%

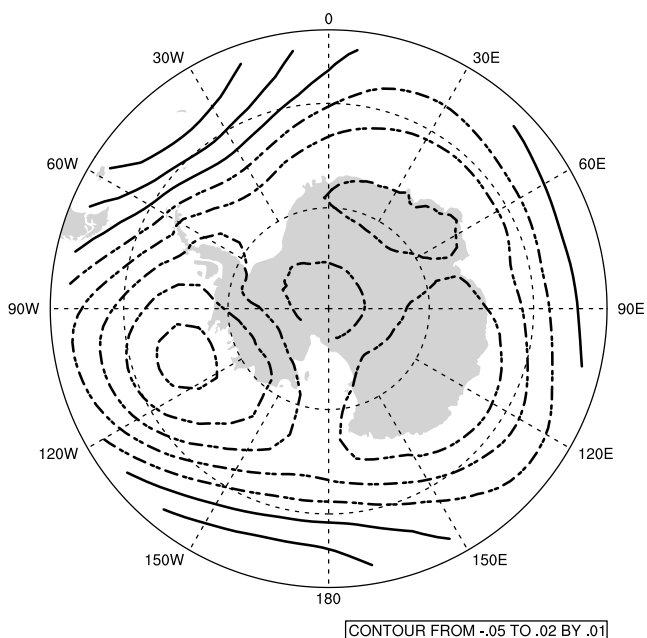

SAM - Retreat

41.29%

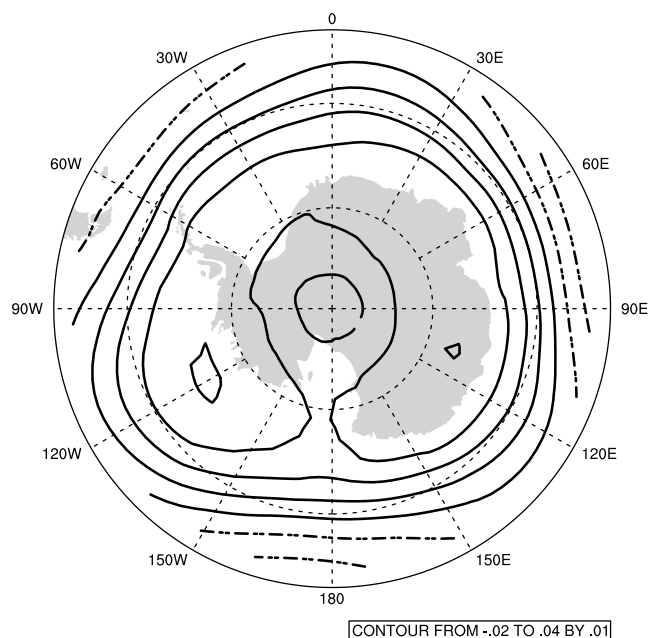

PSA - Advance

27.51%

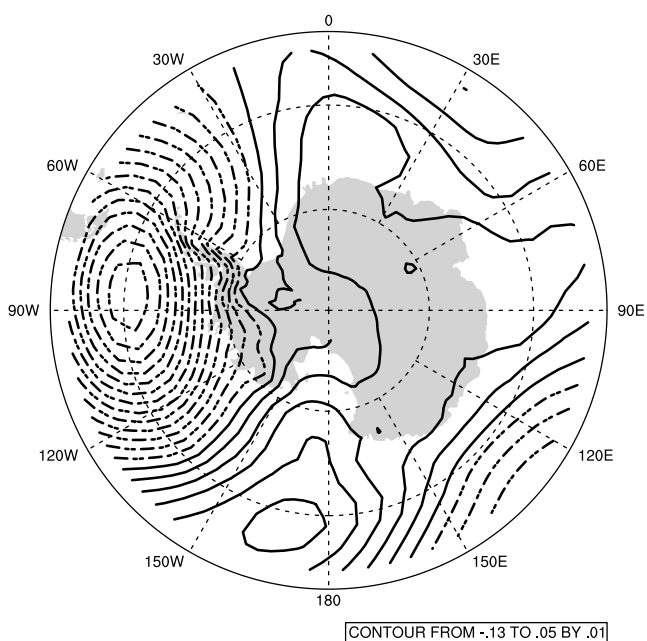

PSA - Retreat

24.73%

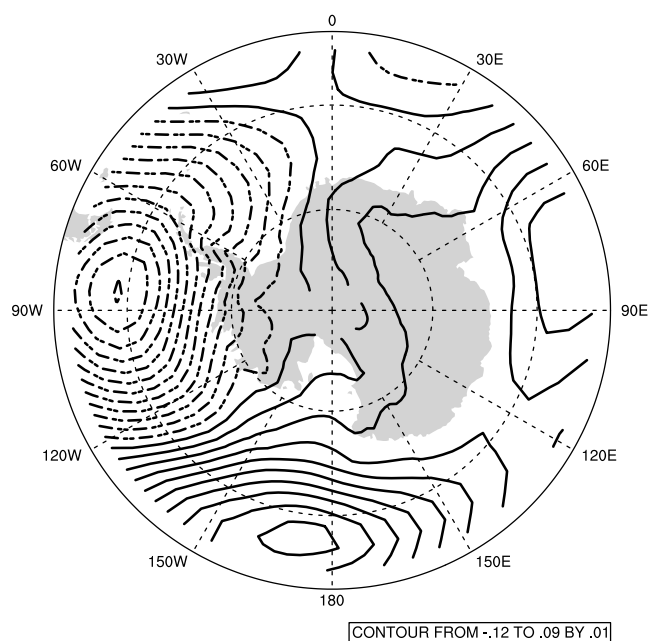

## EOFs of SLP - CESM1-CAM5\_r3i1p1

SAM - Advance

39.78%

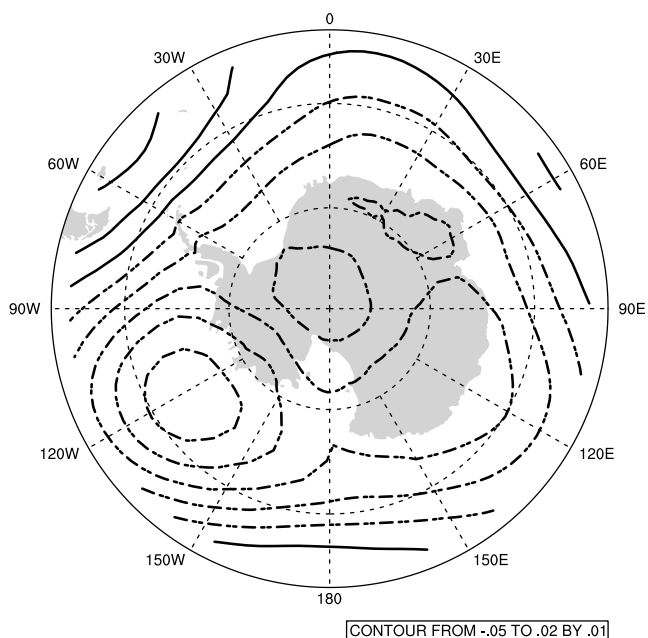

SAM - Retreat

49.29%

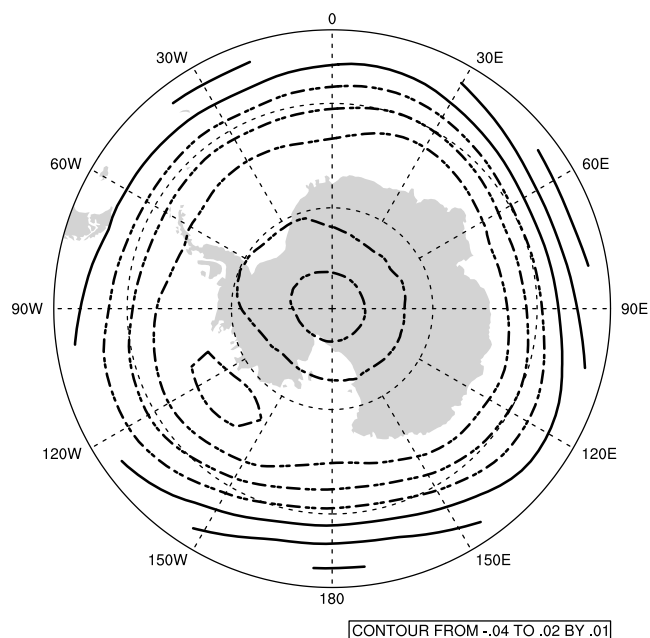

PSA - Advance

25.58%

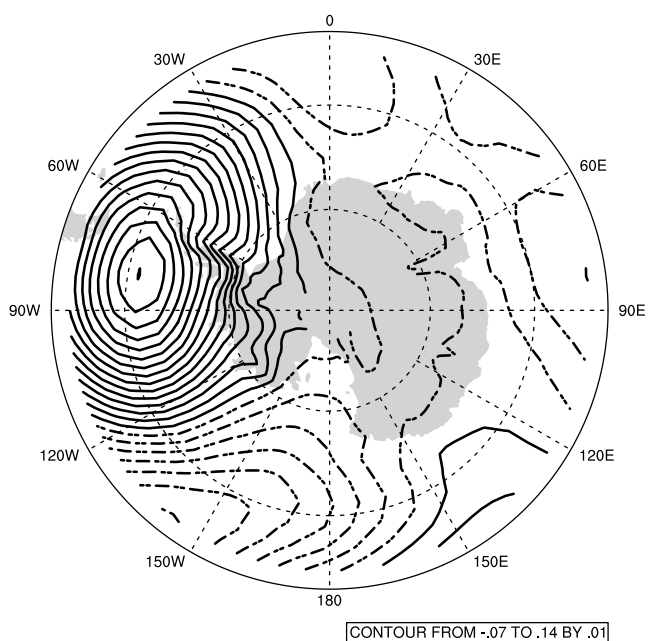

PSA - Retreat

17.83%

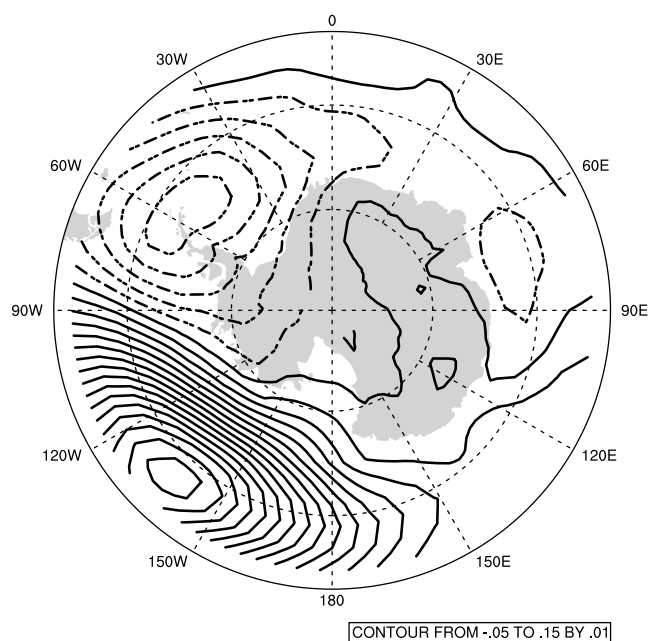



EOFs of SLP - CNRM-CM5\_r10i1p1

SAM - Advance 37.89%

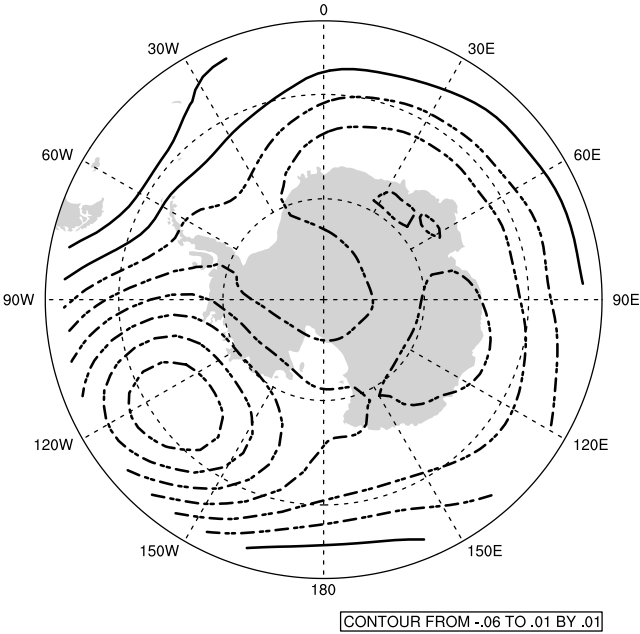

SAM - Retreat 40.81%

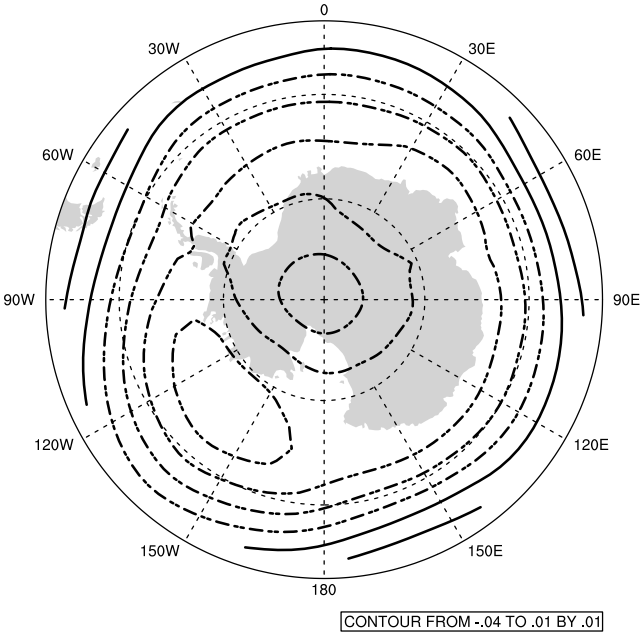

PSA - Advance 24.06%

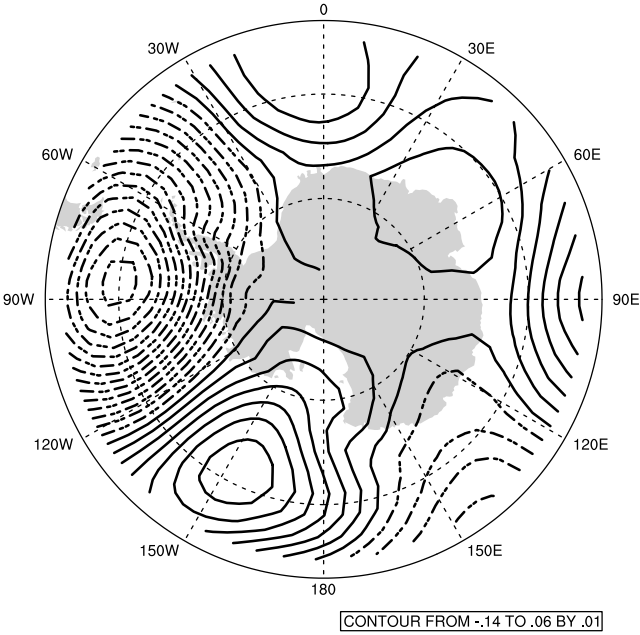

PSA - Retreat 24.68%

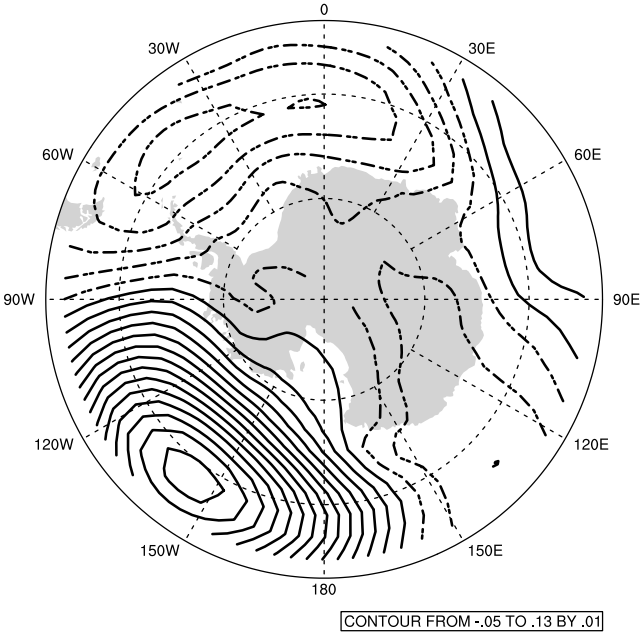

# EOFs of SLP - CNRM-CM5\_r1i1p1

SAM - Advance

43.73%

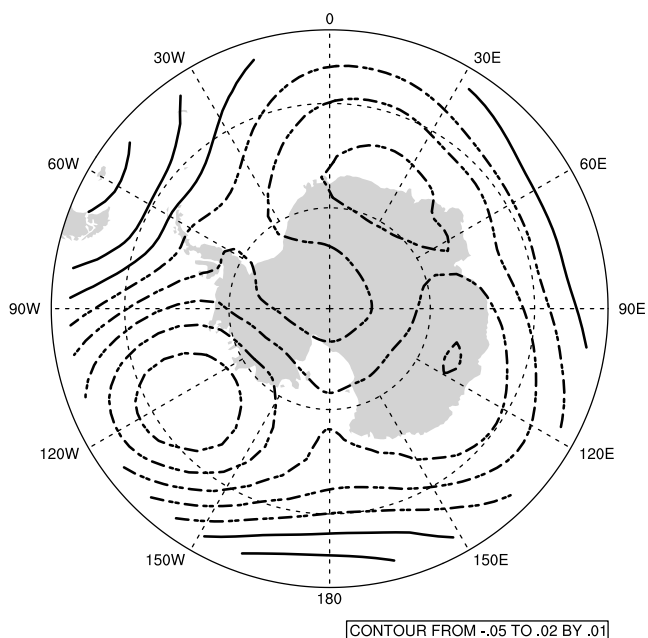

SAM - Retreat

54.45%

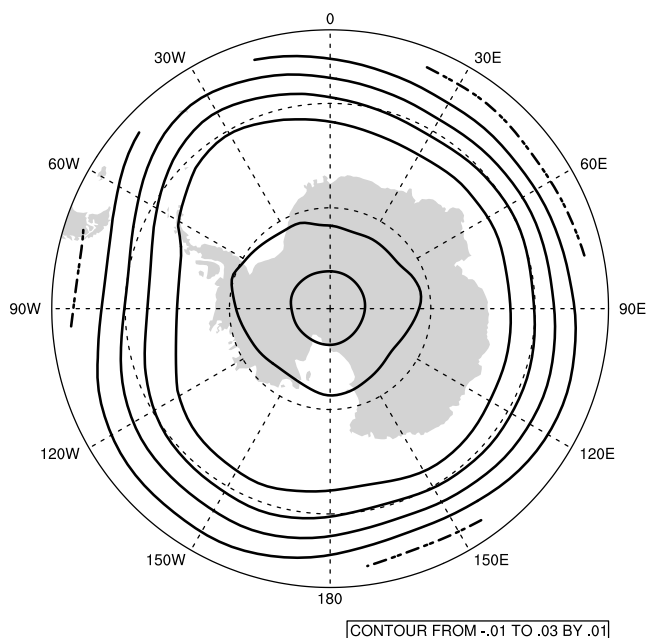

PSA - Advance

24.59%

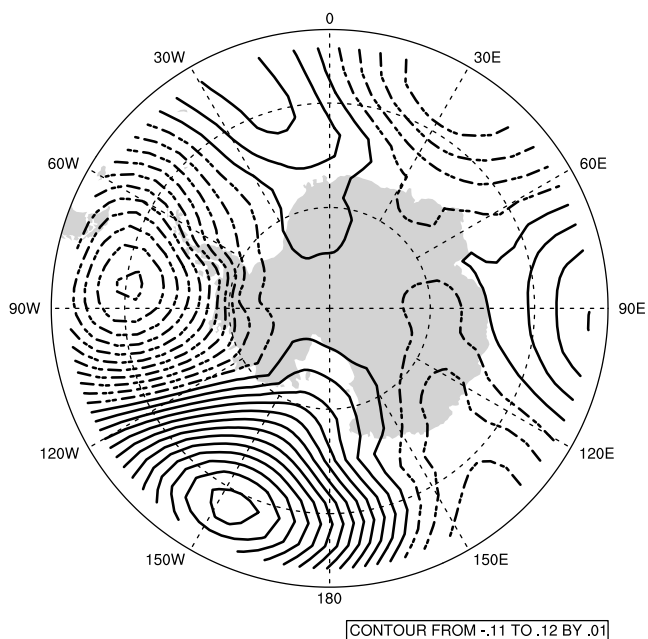

PSA - Retreat

15.85%

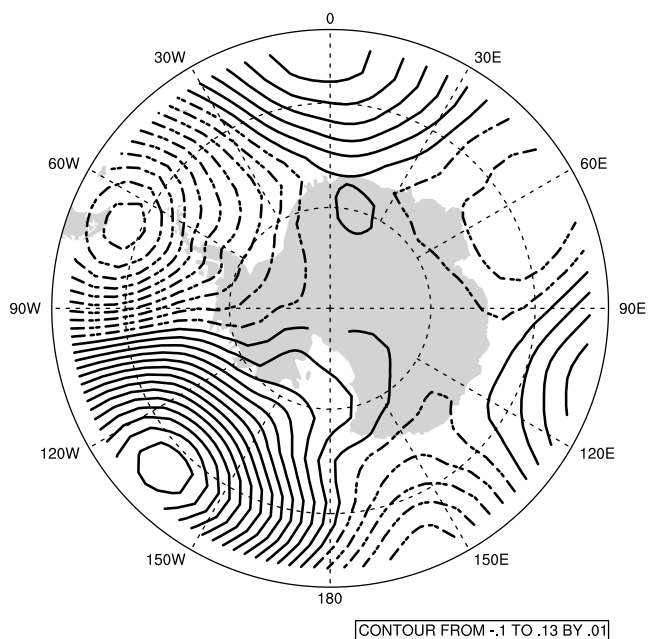

# EOFs of SLP - CNRM-CM5\_r2i1p1

SAM - Advance

36.55%

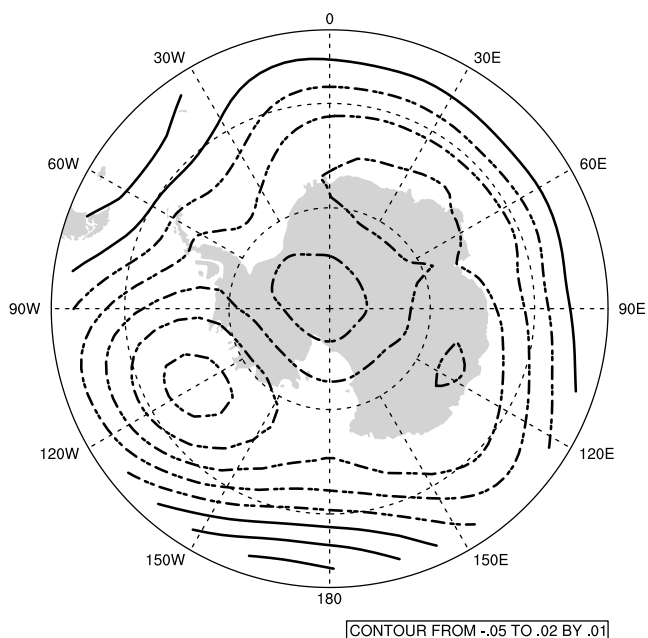

SAM - Retreat

47.36%

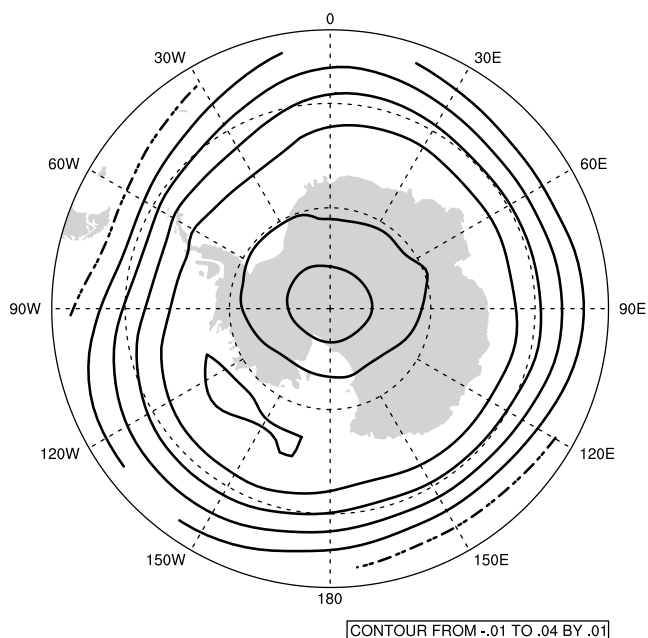

PSA - Advance

26.33%

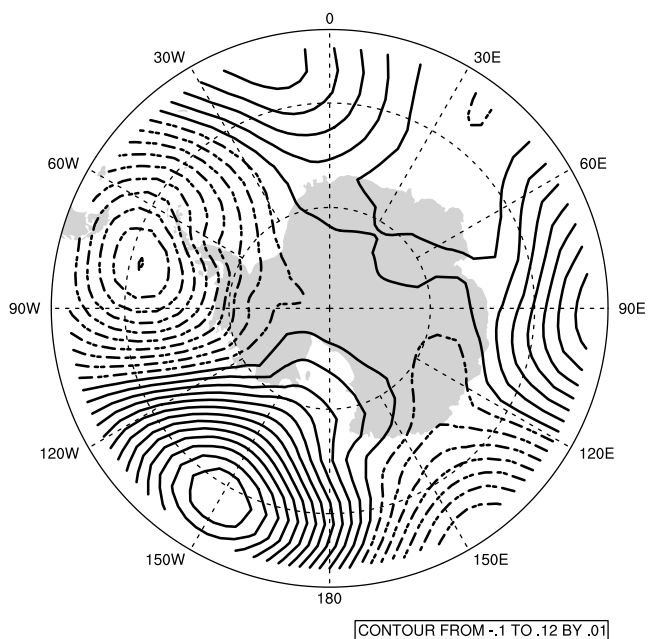

PSA - Retreat

20.9%

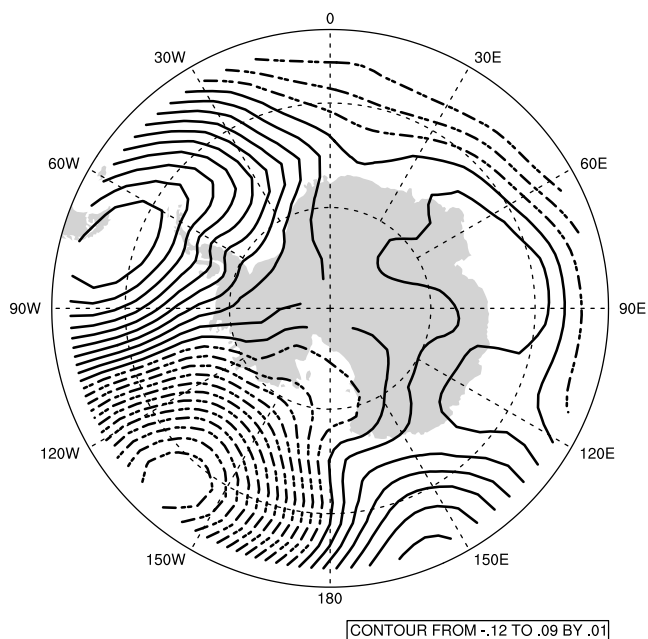

## EOFs of SLP - CNRM-CM5\_r3i1p1

SAM - Advance

34.94%

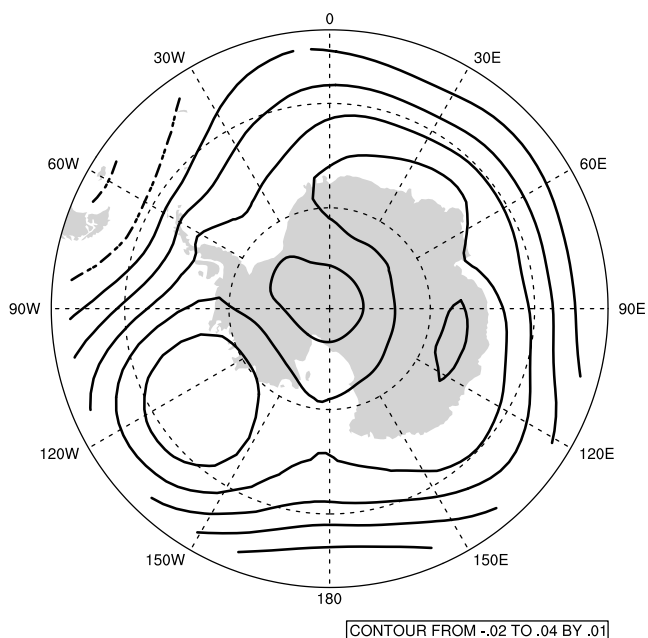

SAM - Retreat

46.01%

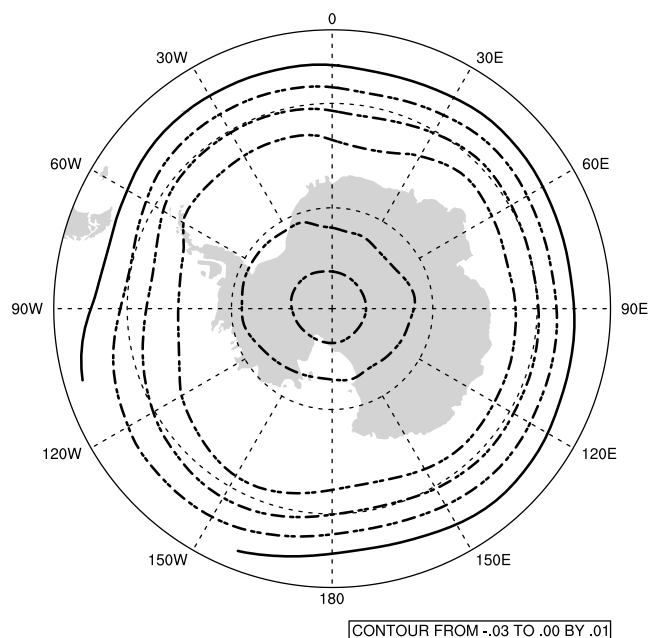

PSA - Advance

28.38%

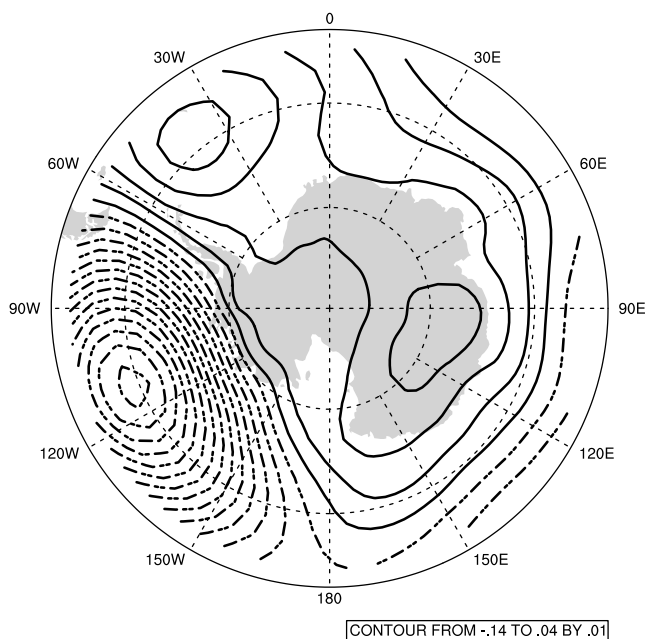

PSA - Retreat

19.72%

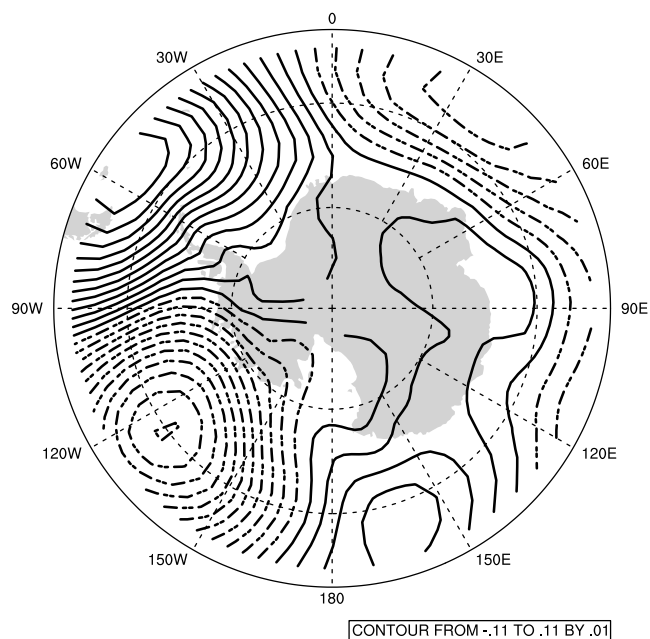

# EOFs of SLP - CNRM-CM5\_r4i1p1

SAM - Advance

42.61%

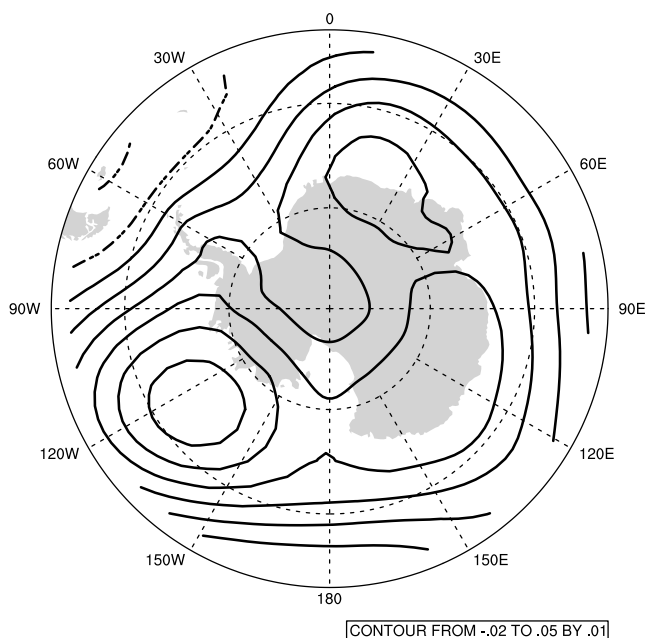

SAM - Retreat

49.53%

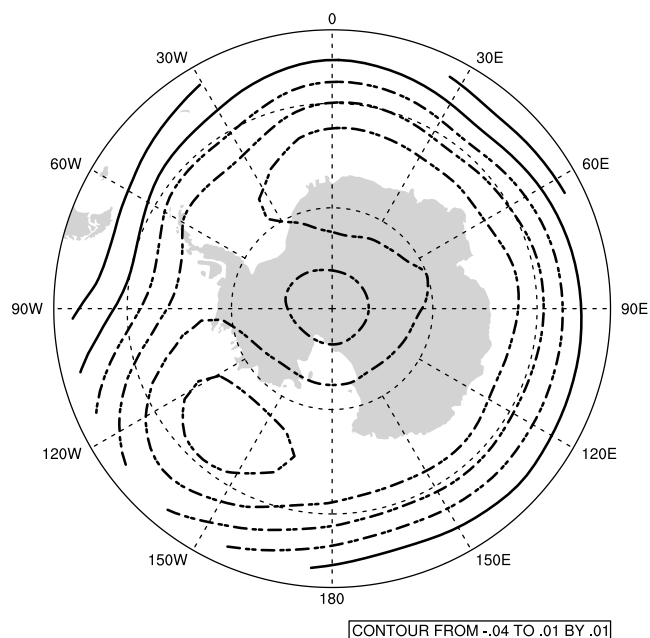

PSA - Advance

23.94%

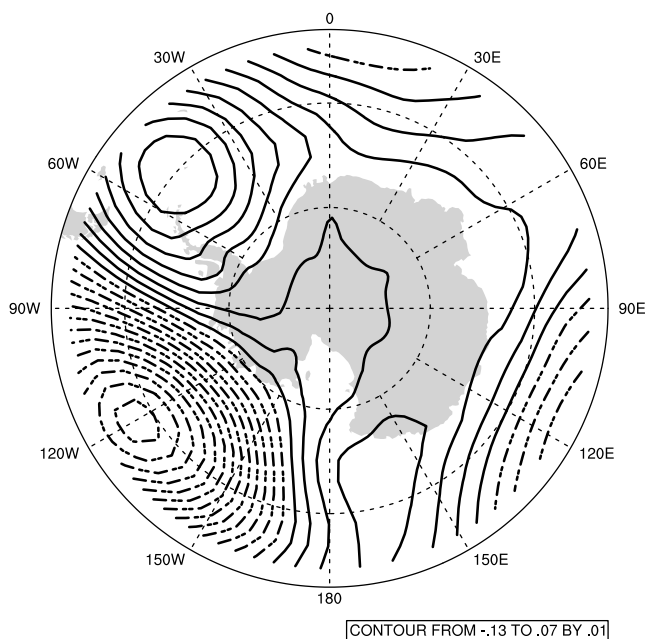

PSA - Retreat

18.84%

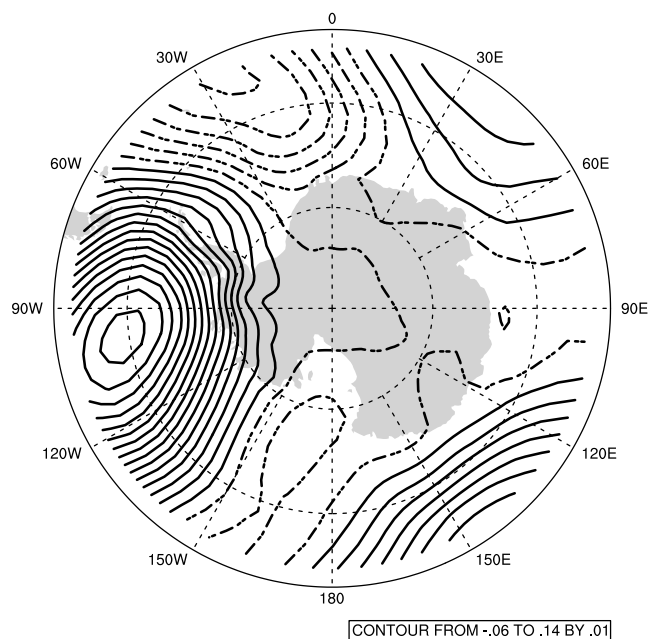

# EOFs of SLP - CNRM-CM5\_r5i1p1

SAM - Advance

38.12%

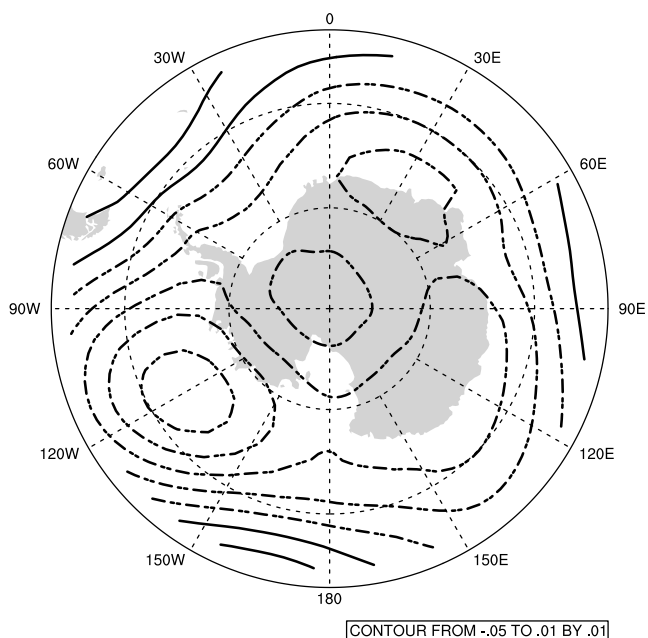

SAM - Retreat

47.25%

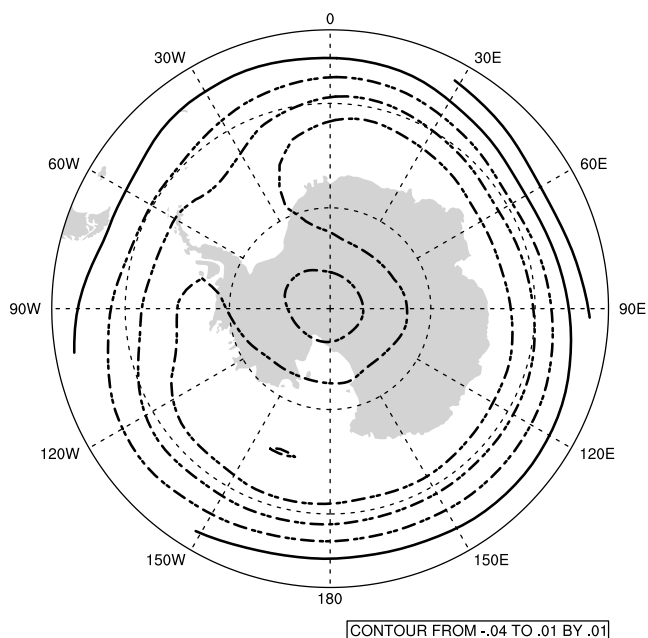

PSA - Advance

27.2%

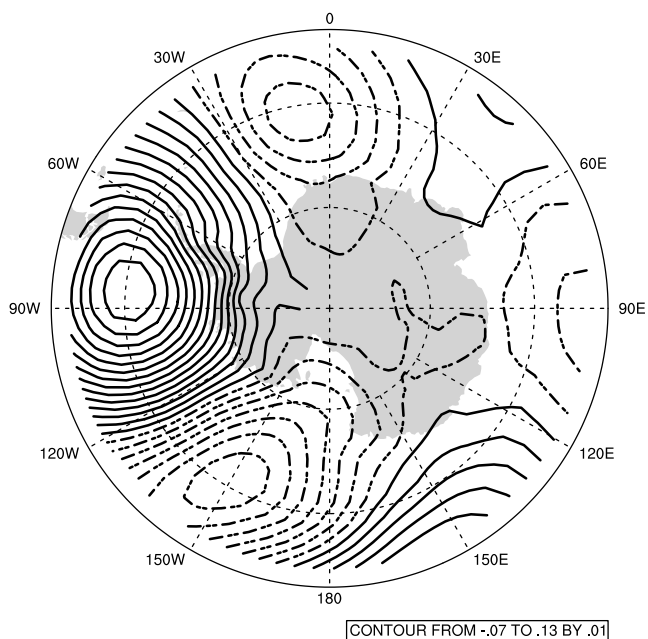

PSA - Retreat

20.6%

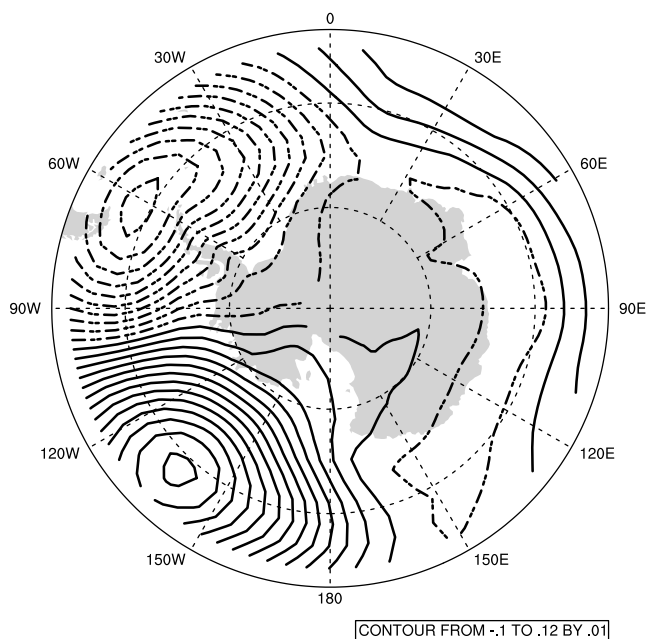

# EOFs of SLP - CNRM-CM5\_r6i1p1

SAM - Advance

37.61%

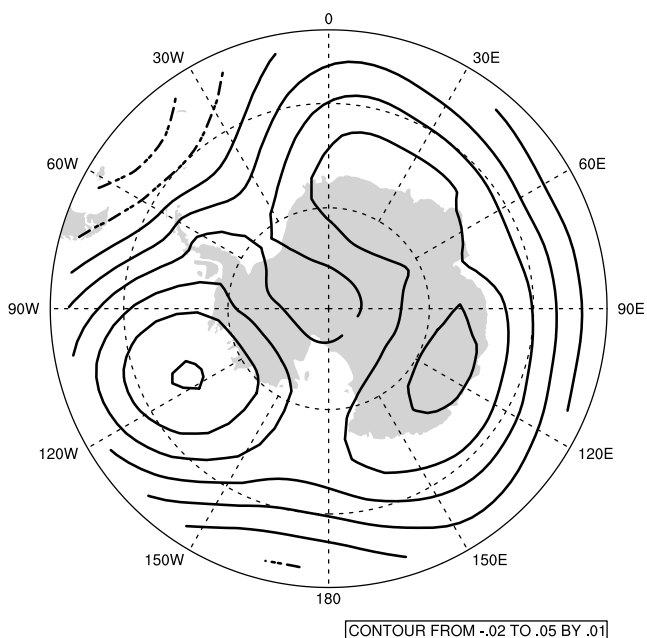

SAM - Retreat

52.79%

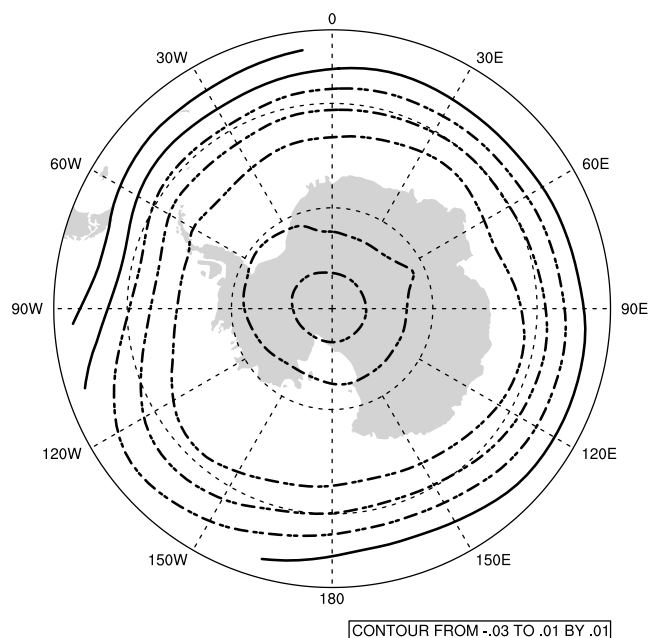

PSA - Advance

28.38%

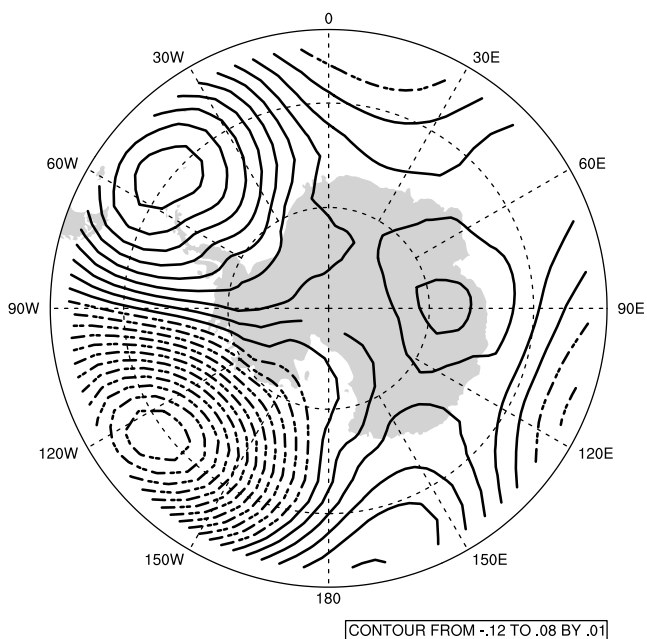

PSA - Retreat

17.71%

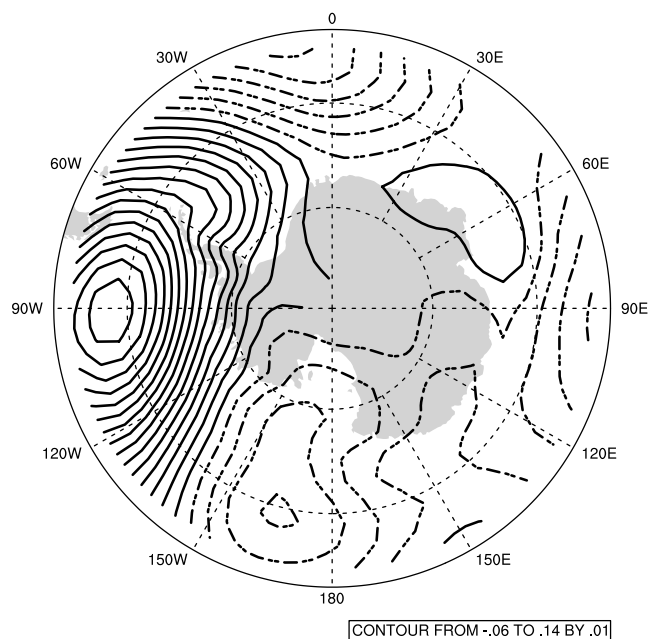

# EOFs of SLP - CNRM-CM5\_r7i1p1

SAM - Advance

38.59%

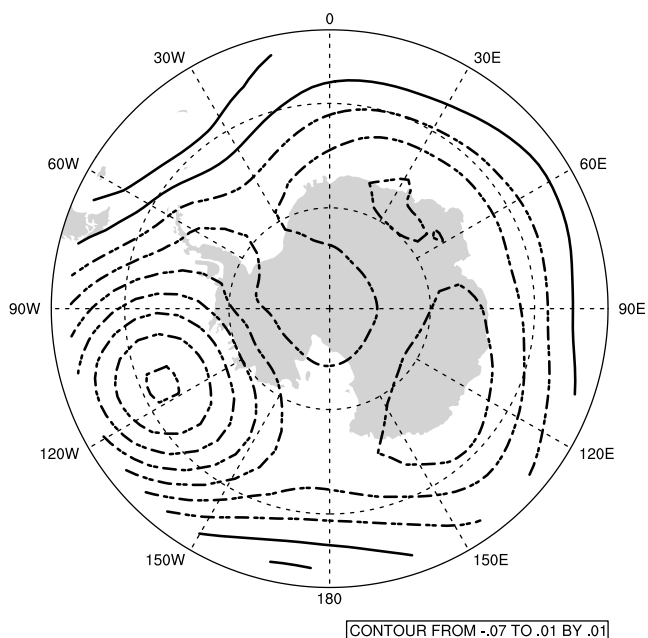

SAM - Retreat

49.53%

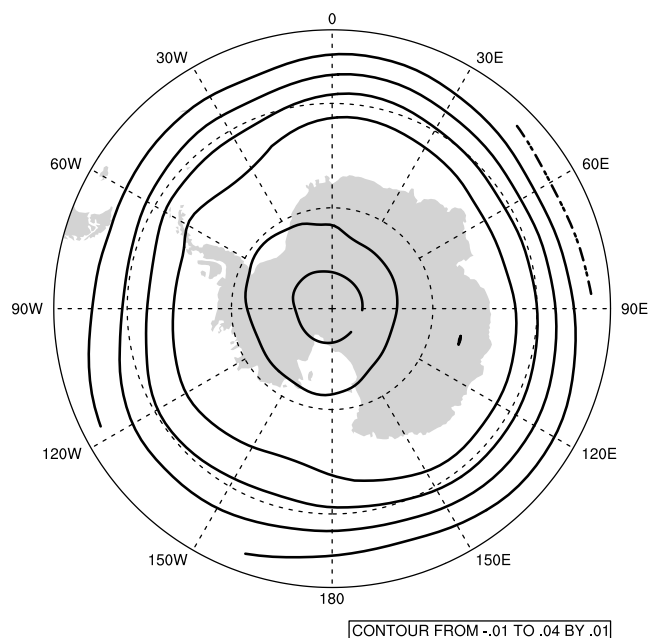

PSA - Advance

27.42%

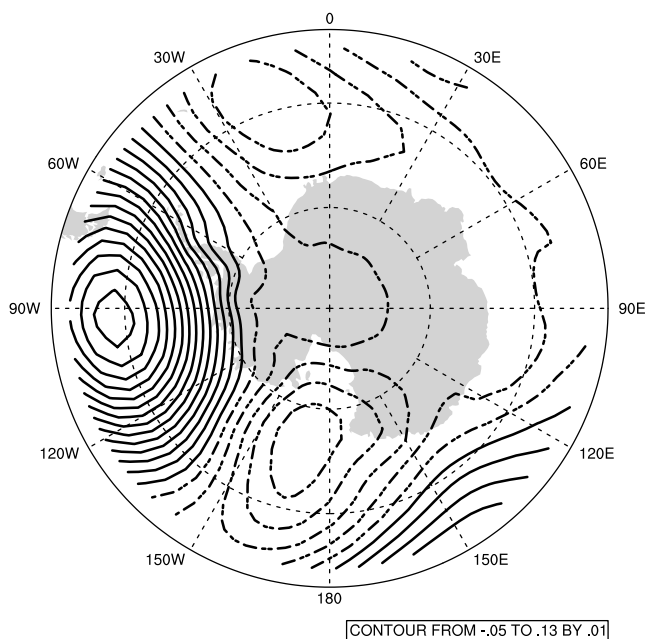

PSA - Retreat

17.93%

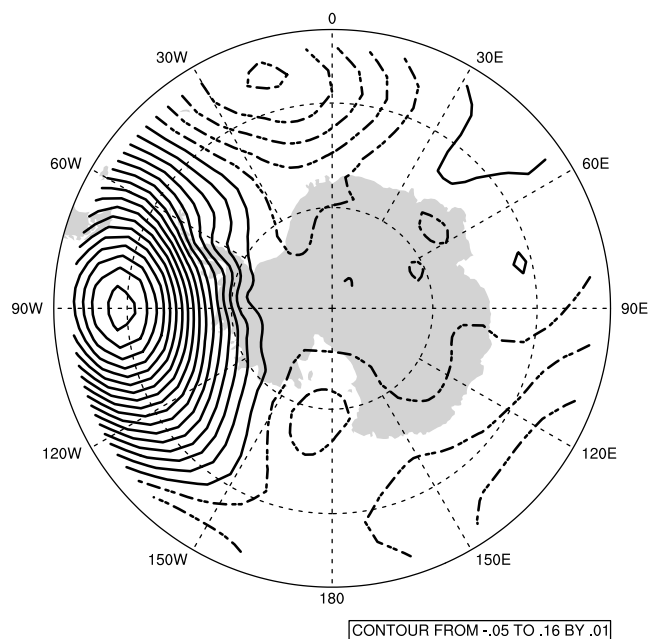



# EOFs of SLP - CNRM-CM5\_r8i1p1

SAM - Advance

37.05%

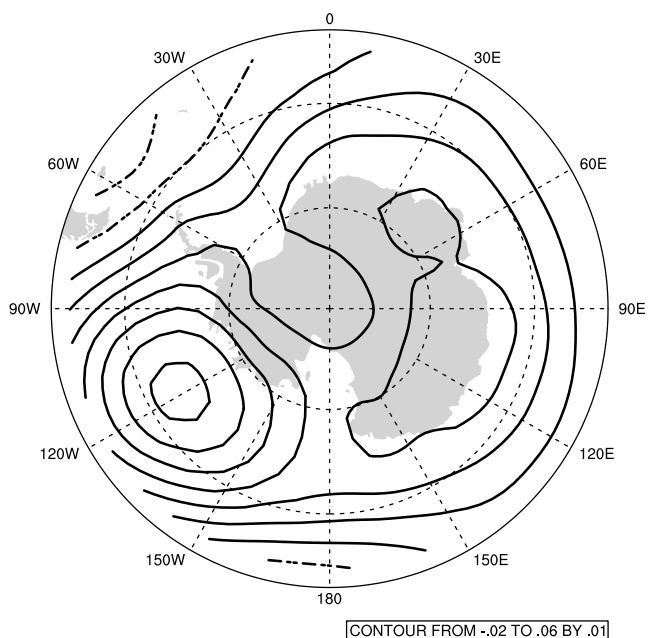

SAM - Retreat

45.27%

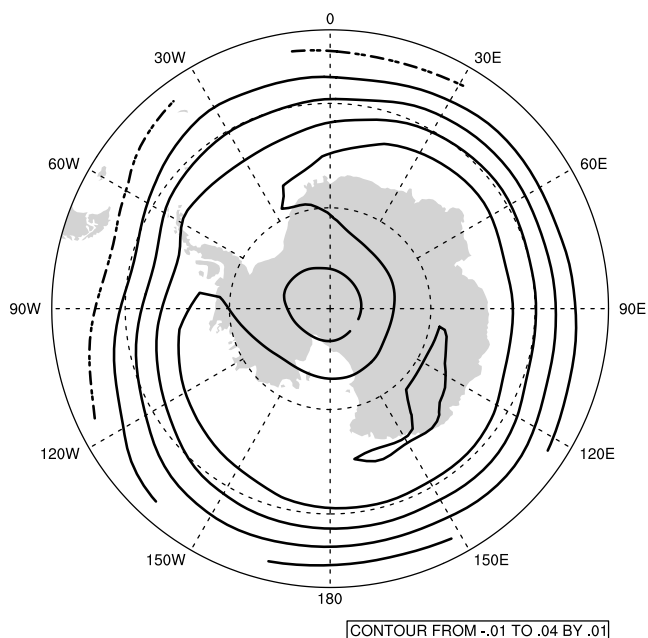

PSA - Advance

26.53%

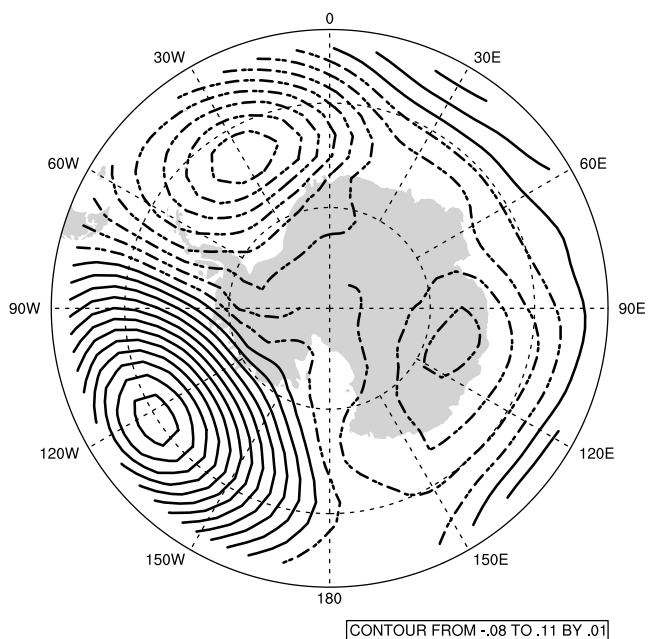

PSA - Retreat

20.7%

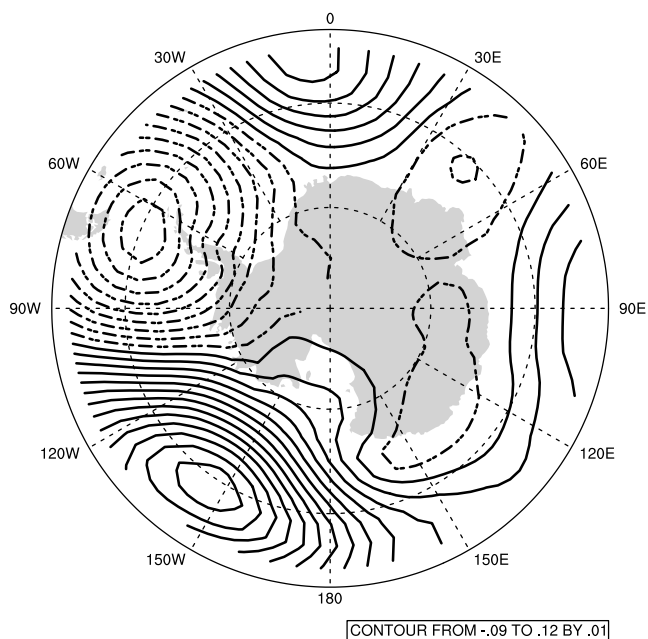

# EOFs of SLP - CNRM-CM5\_r9i1p1

SAM - Advance

39.22%

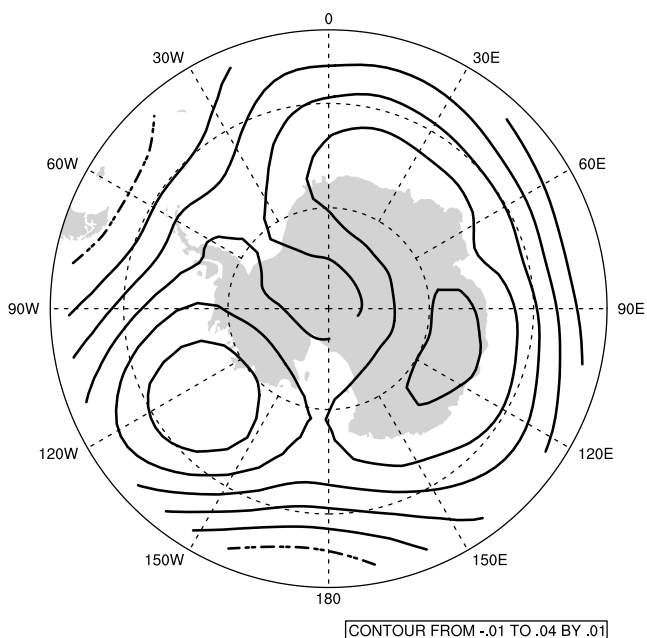

SAM - Retreat

51.33%

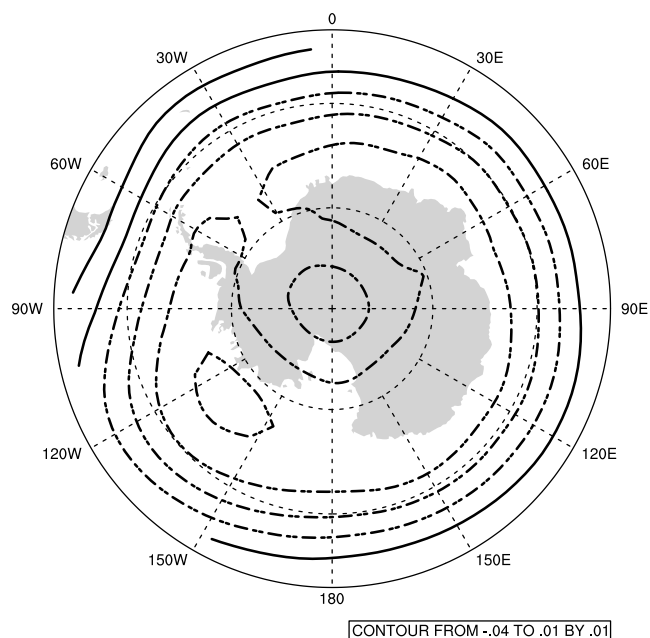

PSA - Advance

24.35%

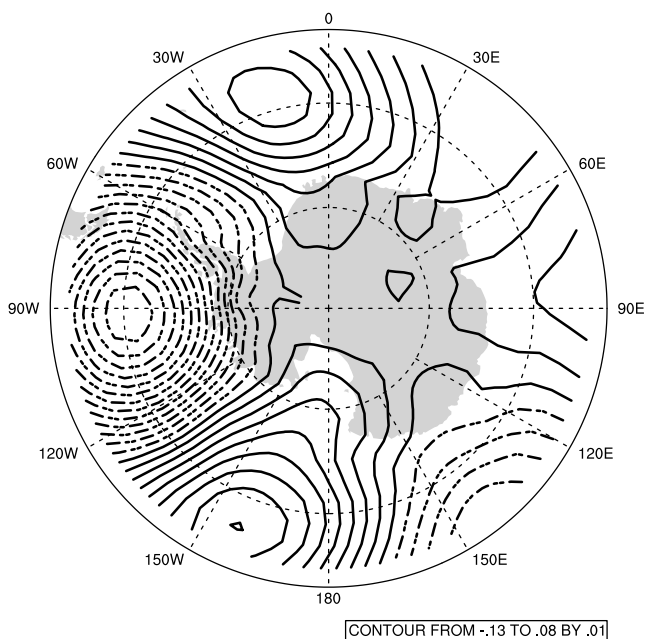

PSA - Retreat

18.53%

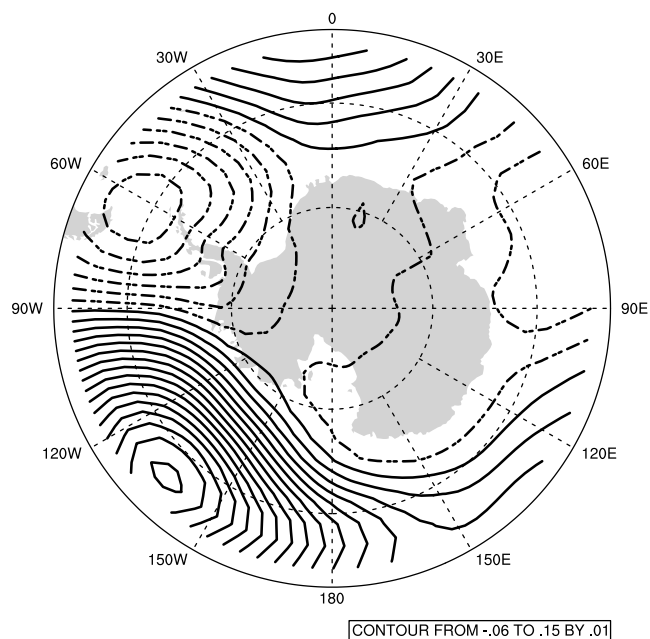

# EOFs of SLP - CanESM2\_r1i1p1

SAM - Advance

37.66%

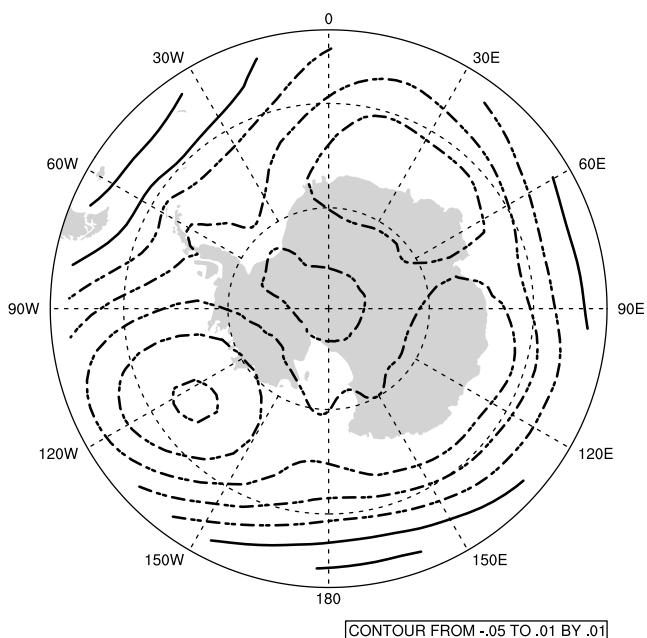

SAM - Retreat

48.82%

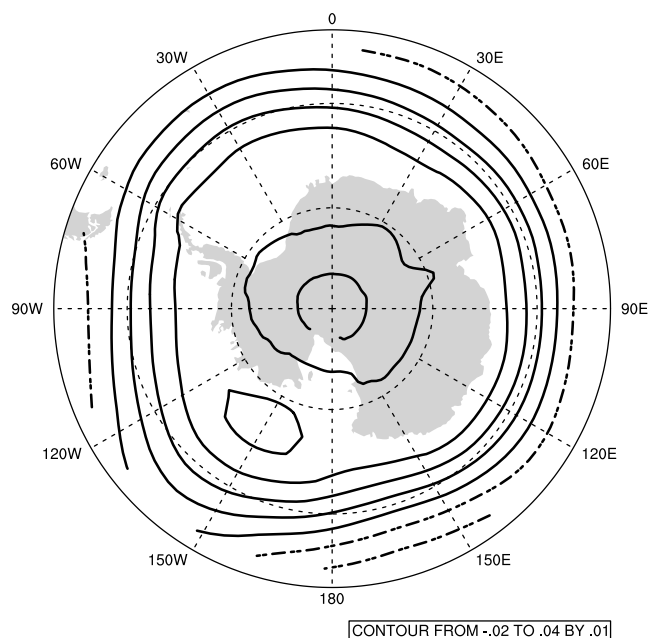

PSA - Advance

25.93%

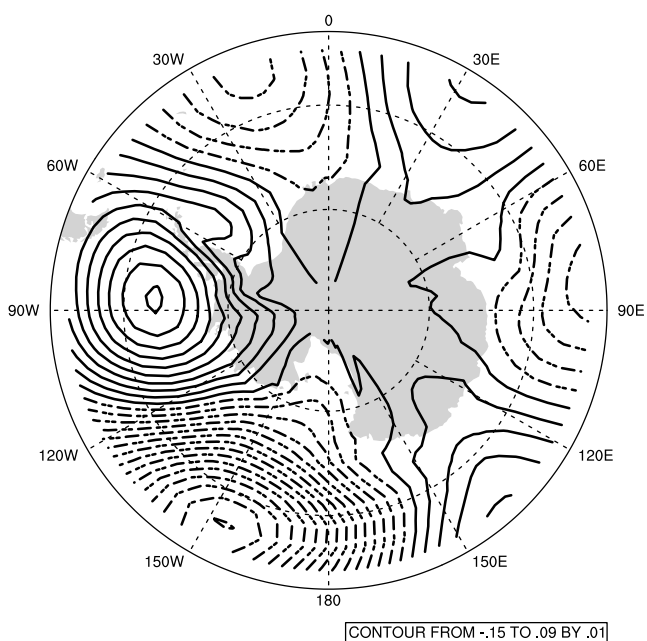

PSA - Retreat

18.69%

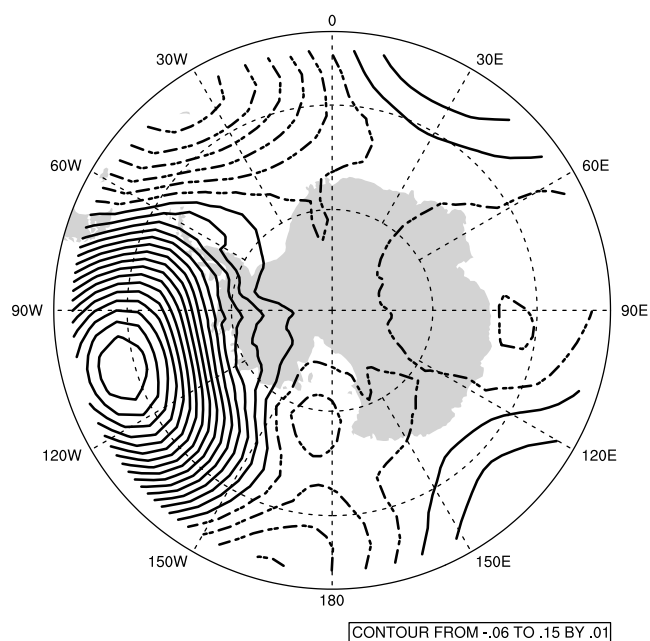

# EOFs of SLP - CanESM2\_r2i1p1

SAM - Advance

33.44%

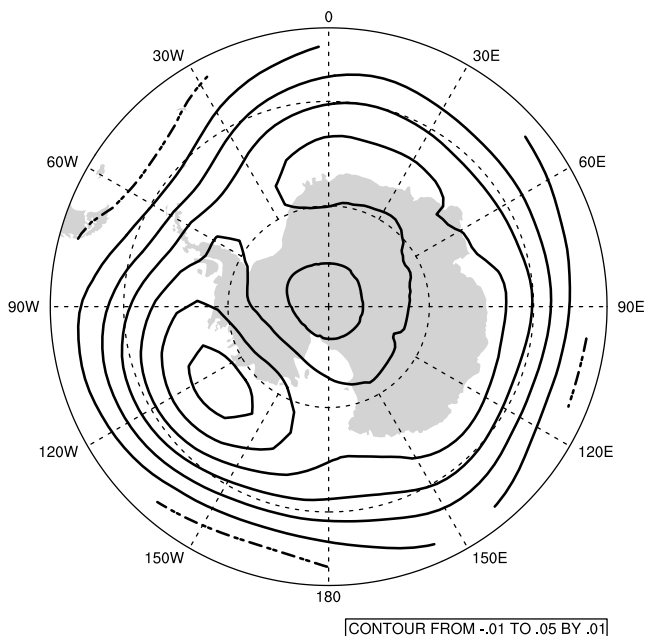

SAM - Retreat

52.52%

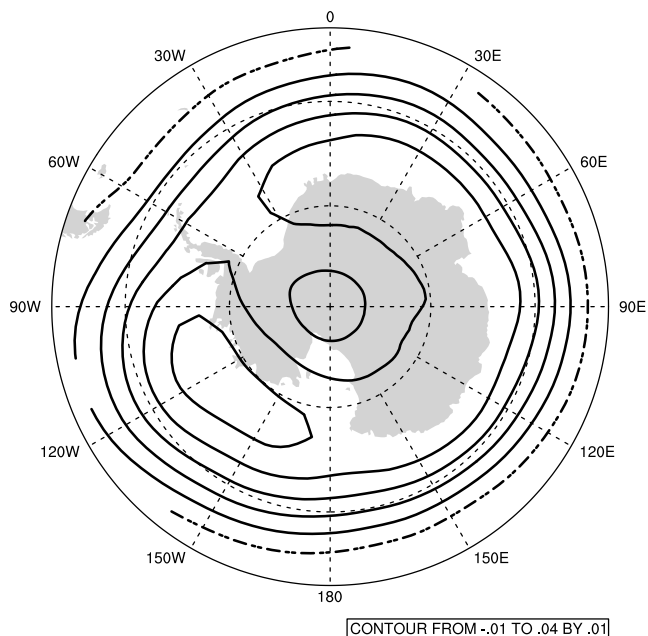

PSA - Advance

29.29%

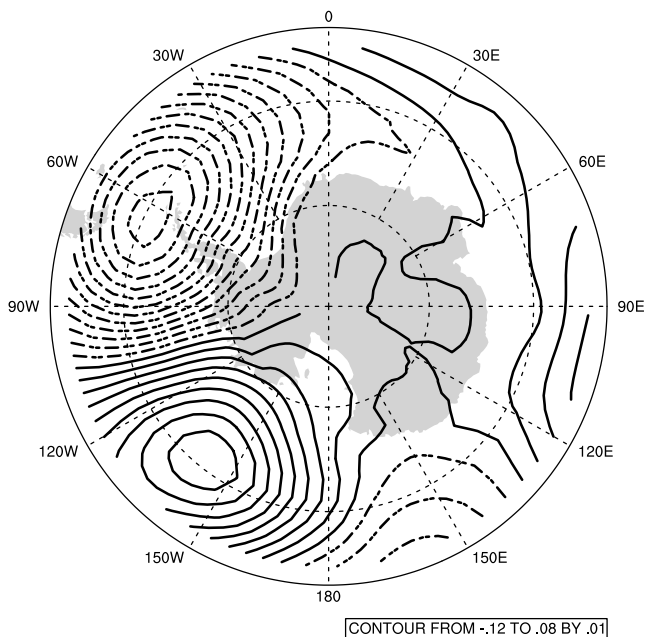

PSA - Retreat

19.27%

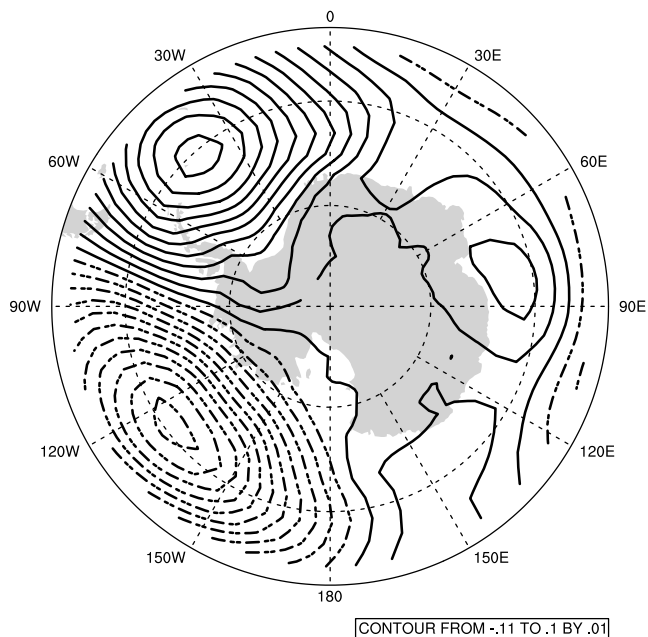

## EOFs of SLP - CanESM2\_r3i1p1

SAM - Advance

29.33%

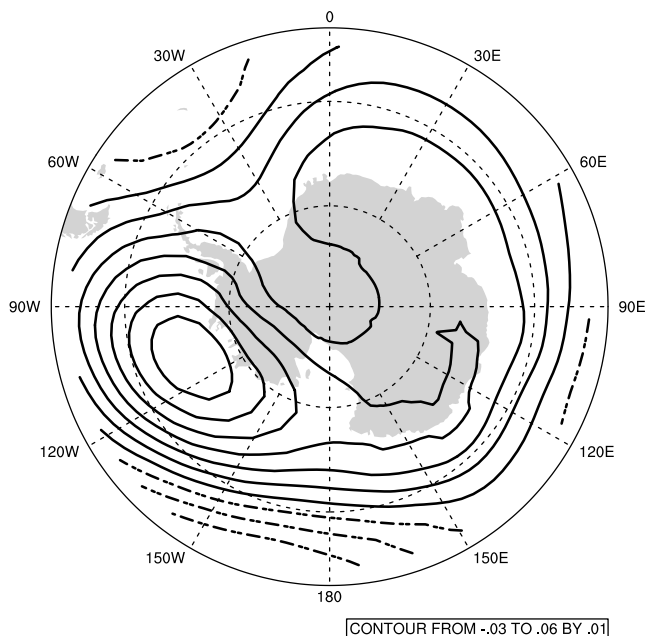

SAM - Retreat

42.24%

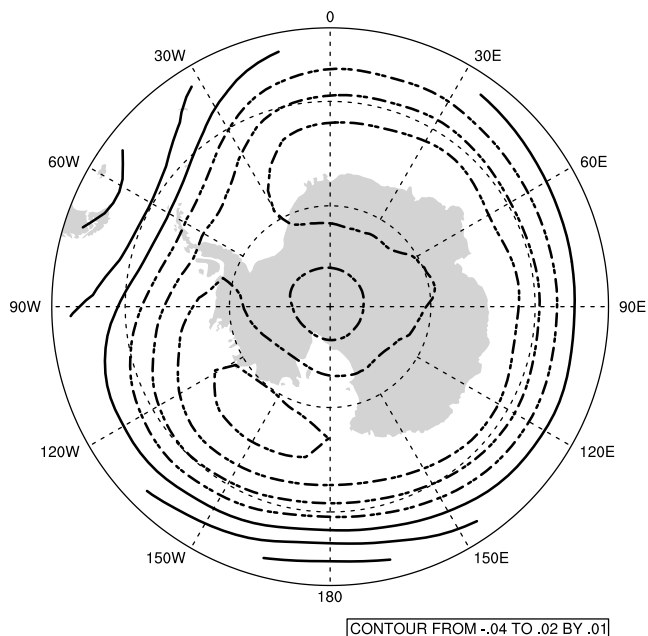

PSA - Advance

33.36%

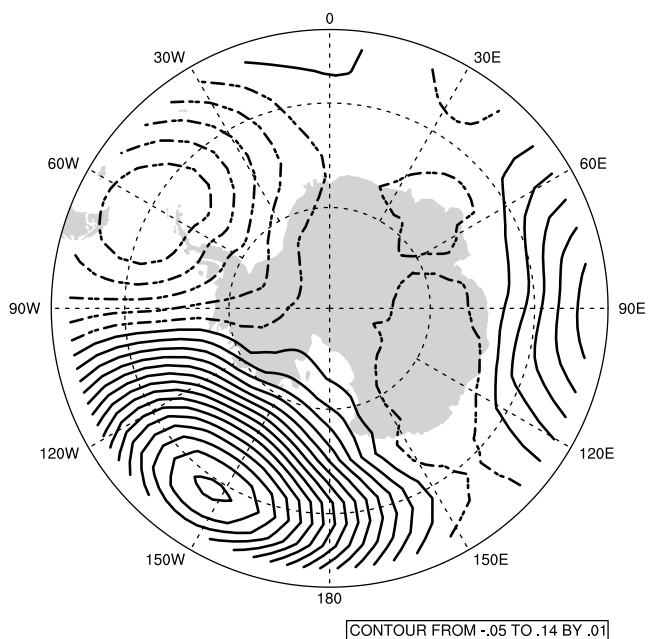

PSA - Retreat

24.96%

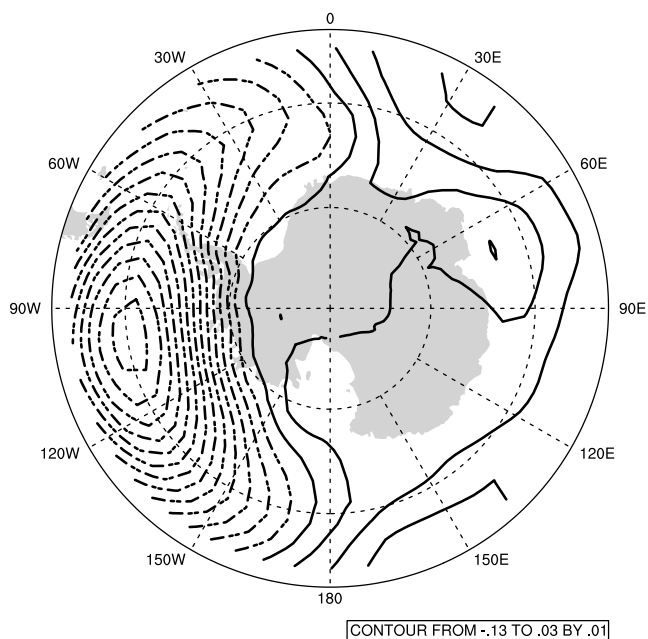

# EOFs of SLP - CanESM2\_r4i1p1

SAM - Advance

32.53%

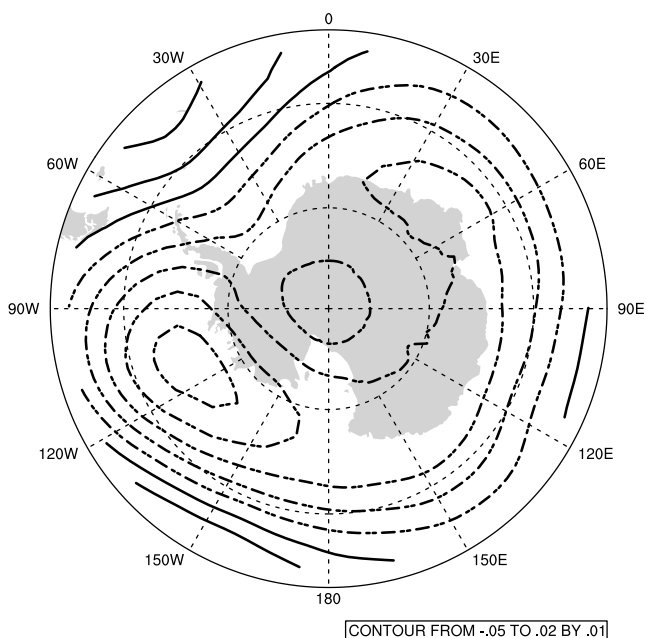

SAM - Retreat

48.86%

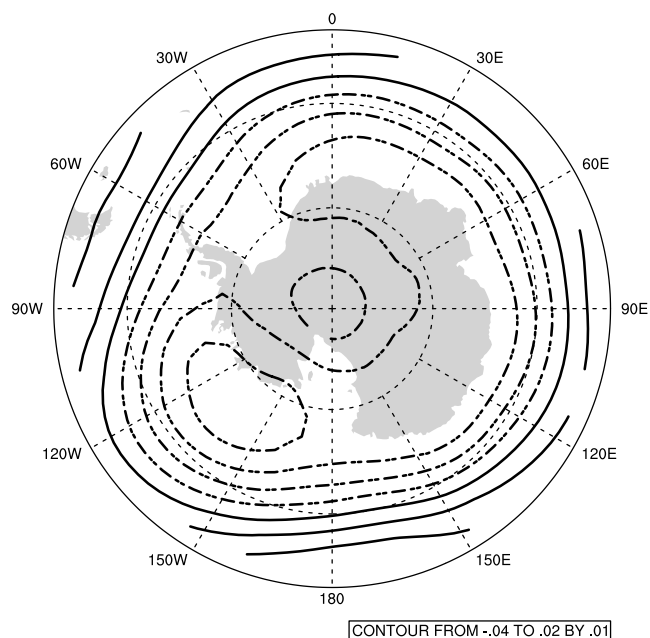

PSA - Advance

29.85%

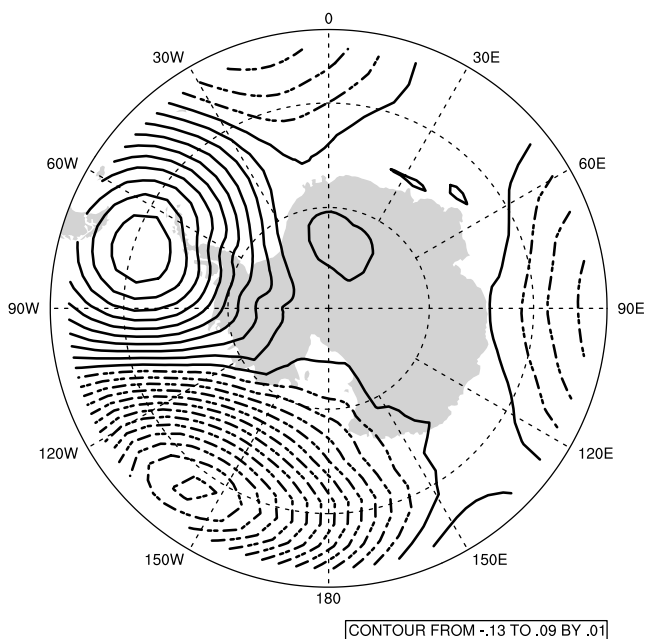

PSA - Retreat

20.28%

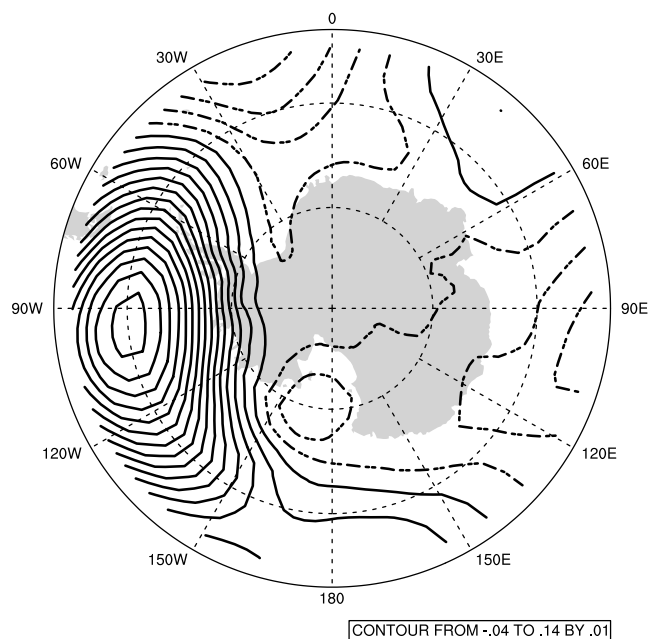

# EOFs of SLP - CanESM2\_r5i1p1

SAM - Advance

36.95%

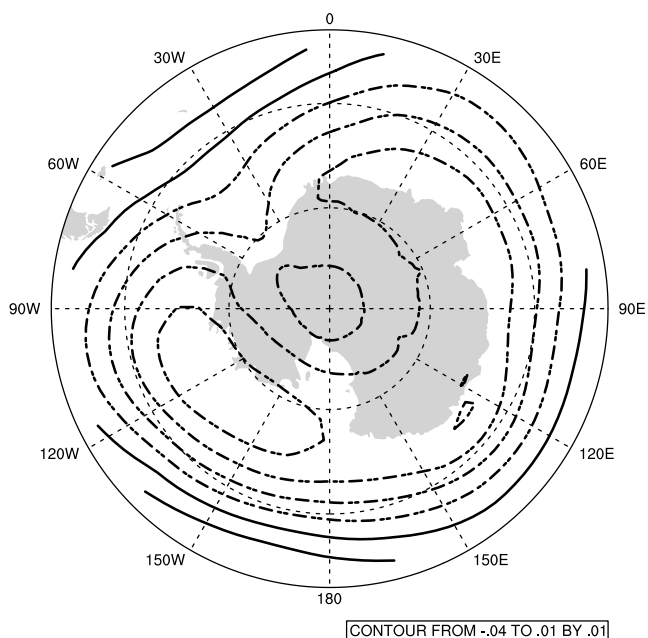

SAM - Retreat

44.16%

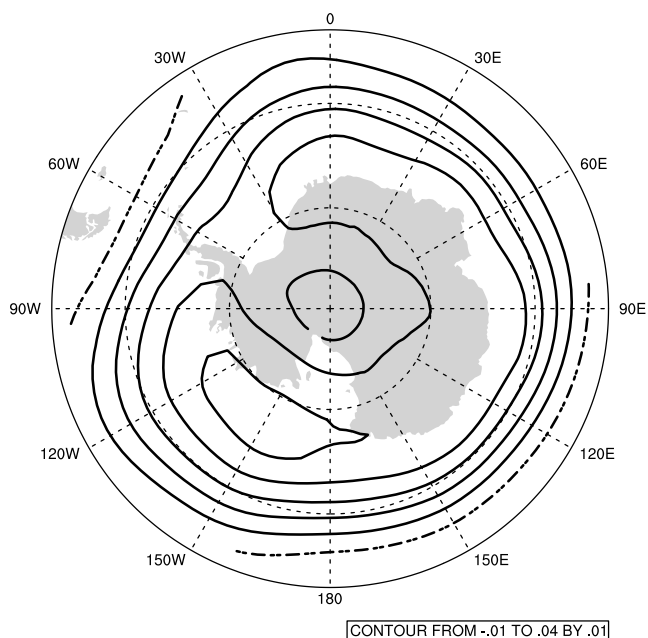

PSA - Advance

29.01%

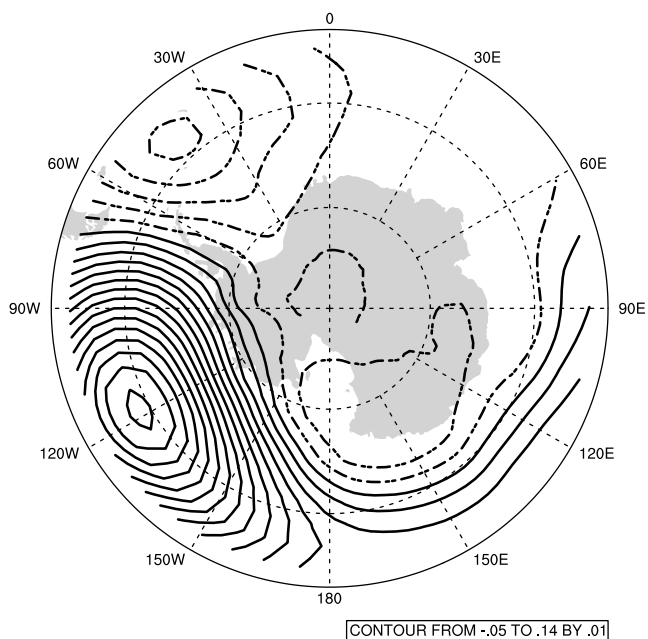

PSA - Retreat

23.28%

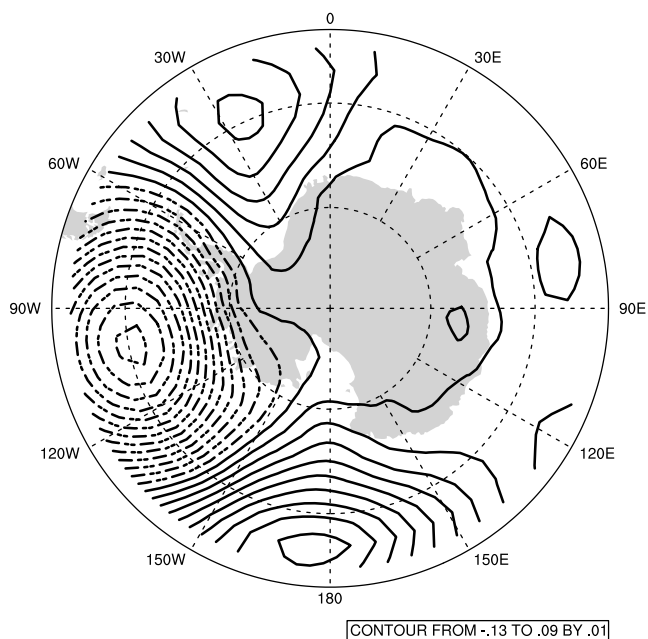

# EOFs of SLP - FGOALS-g2\_r1i1p1

SAM - Advance

35.56%

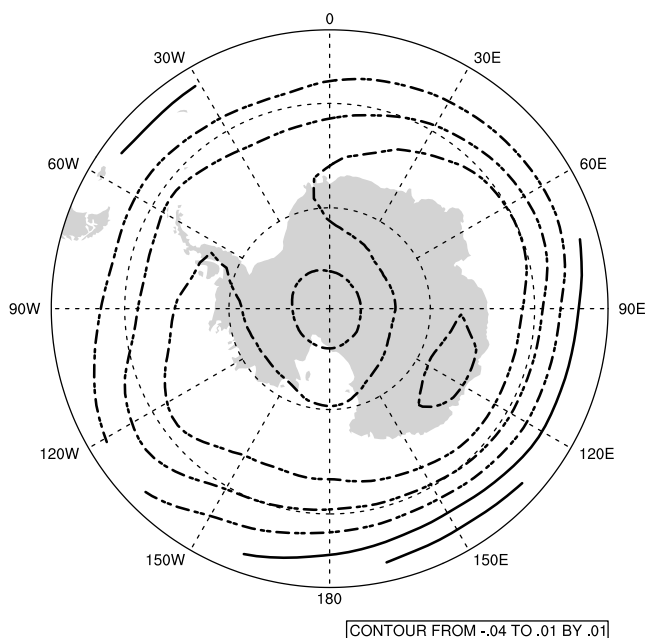

SAM - Retreat

49.41%

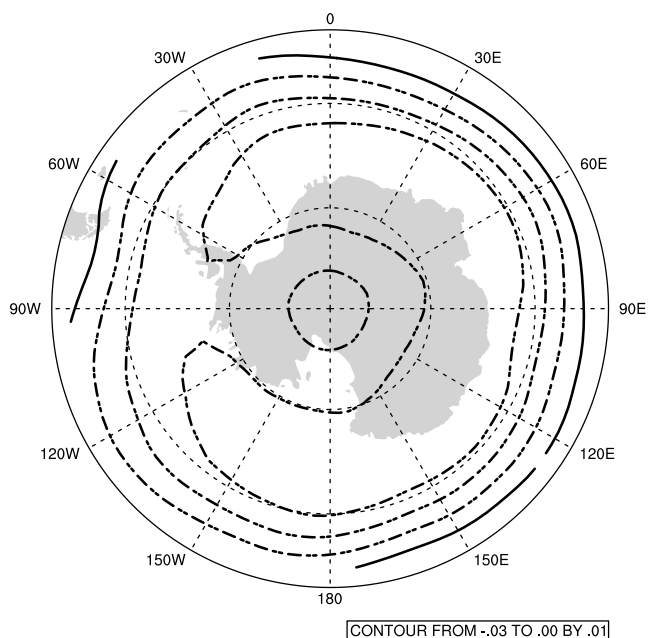

PSA - Advance

25.3%

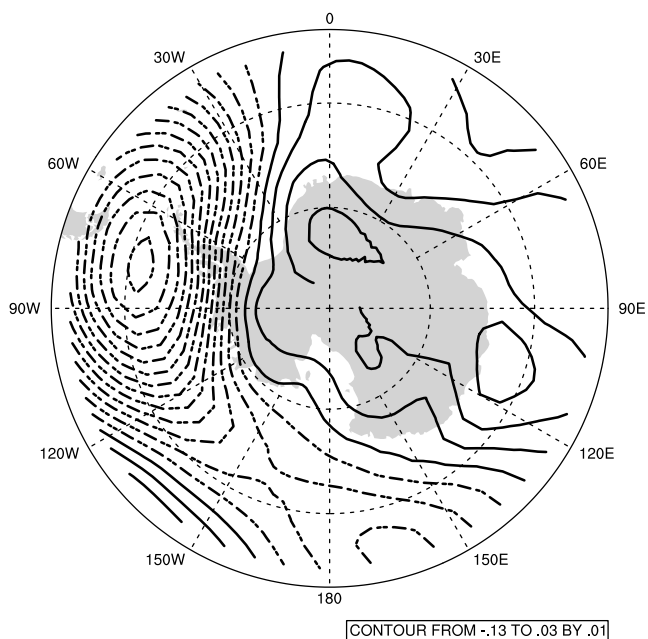

PSA - Retreat

15.32%

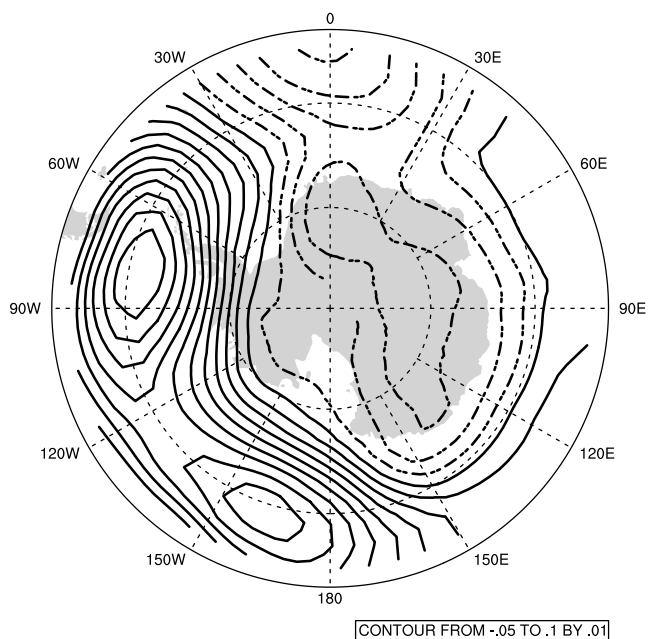



## EOFs of SLP - FGOALS-g2\_r2i1p1

SAM - Advance

38.96%

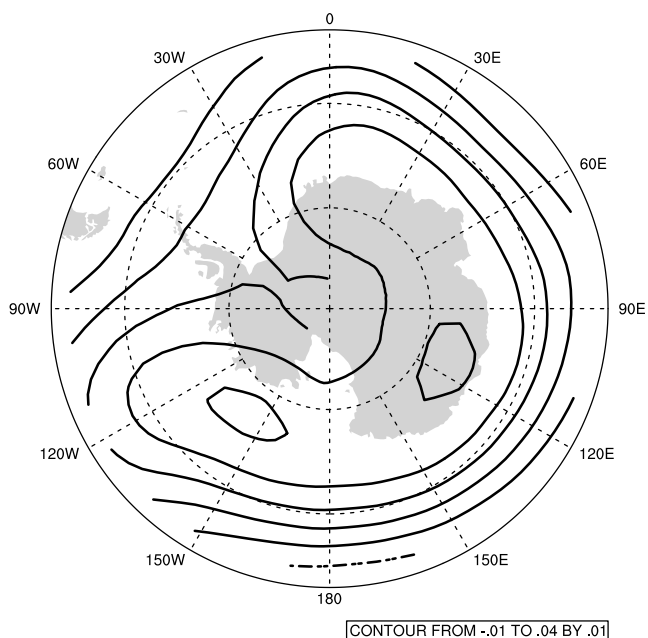

SAM - Retreat

51.1%

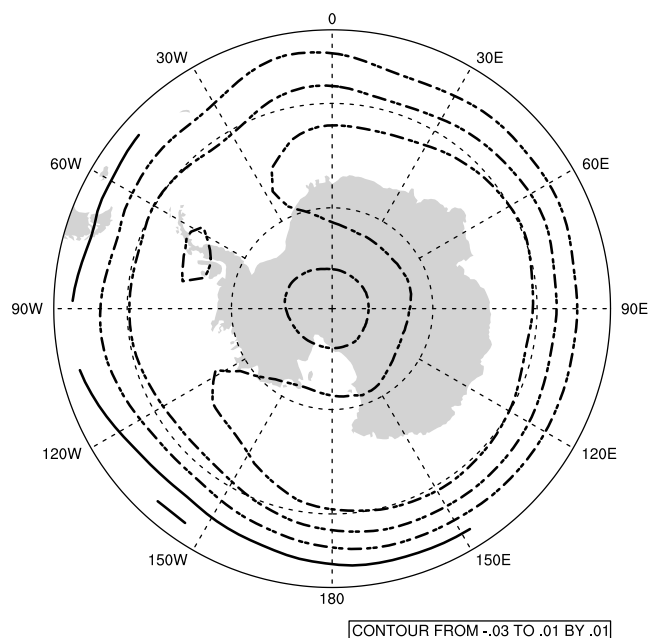

PSA - Advance

21.93%

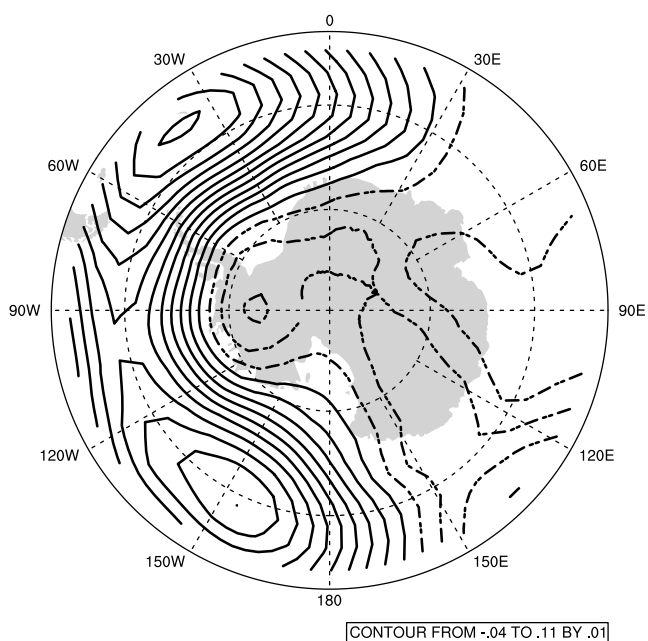

PSA - Retreat

16.27%

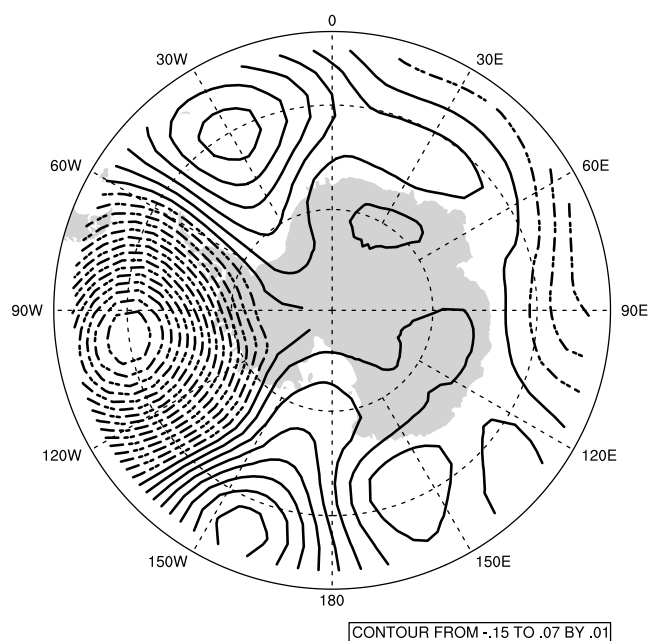

# EOFs of SLP - FGOALS-g2\_r3i1p1

SAM - Advance

40.83%

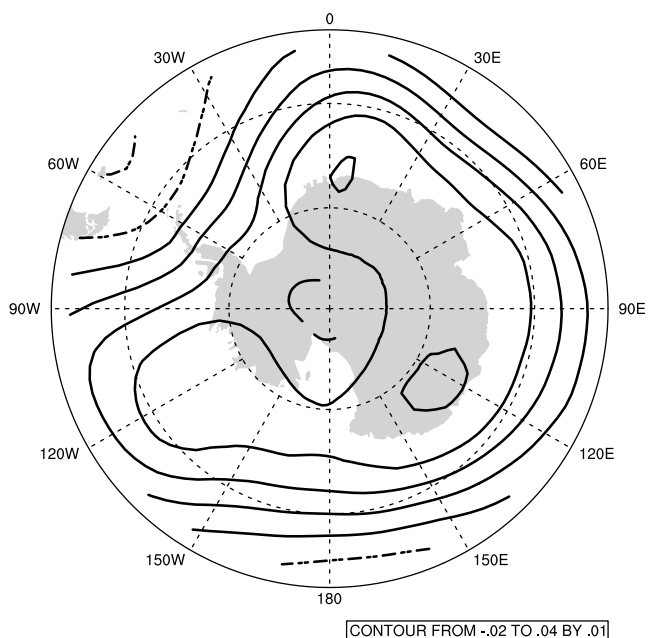

SAM - Retreat

54.91%

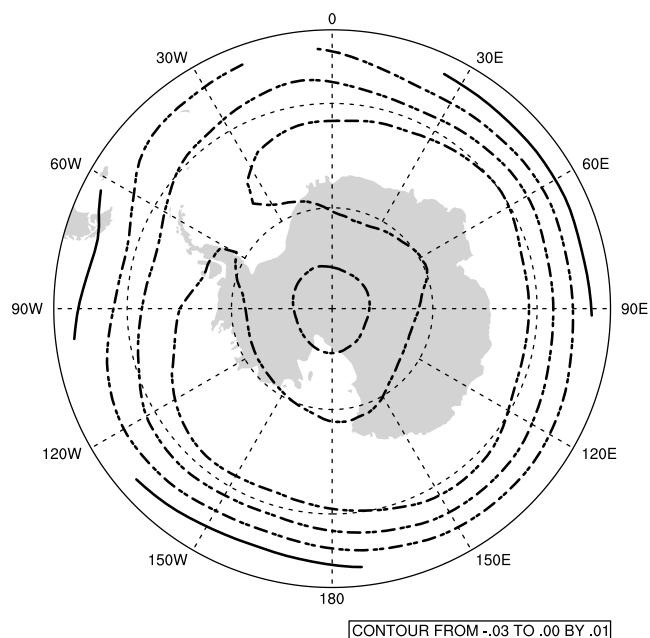

PSA - Advance

22.64%

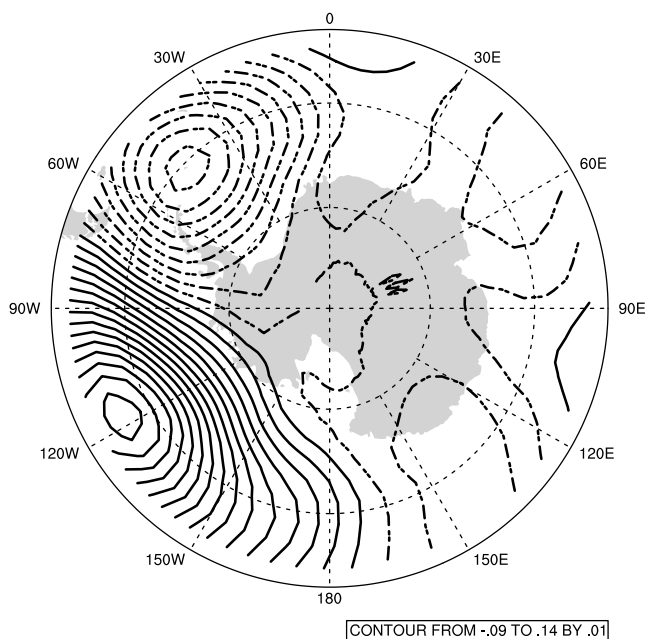

PSA - Retreat

13.95%

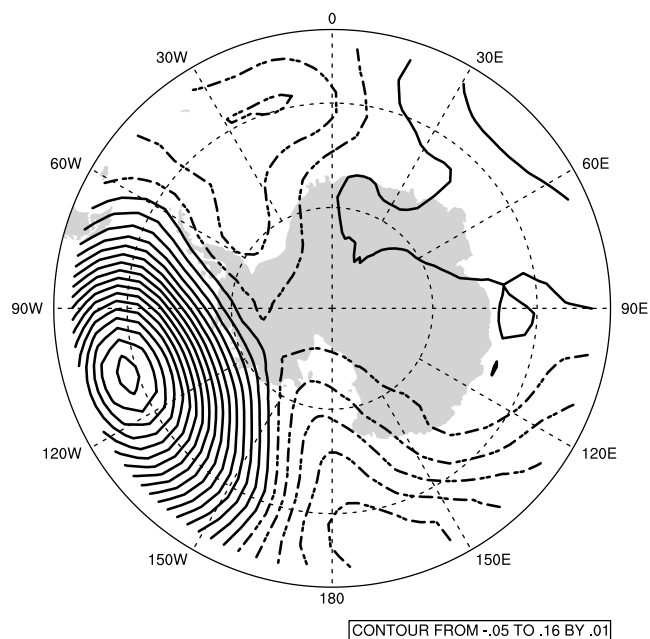

# EOFs of SLP - FGOALS-g2\_r4i1p1

SAM - Advance

37.69%

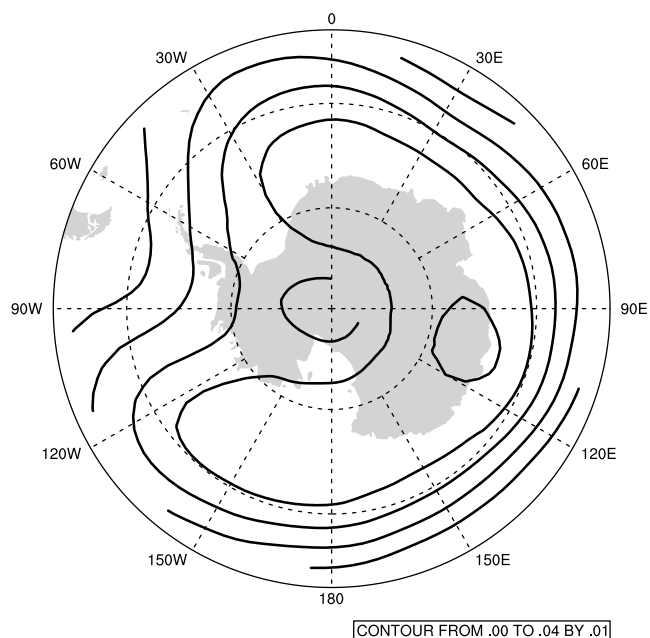

SAM - Retreat

57.17%

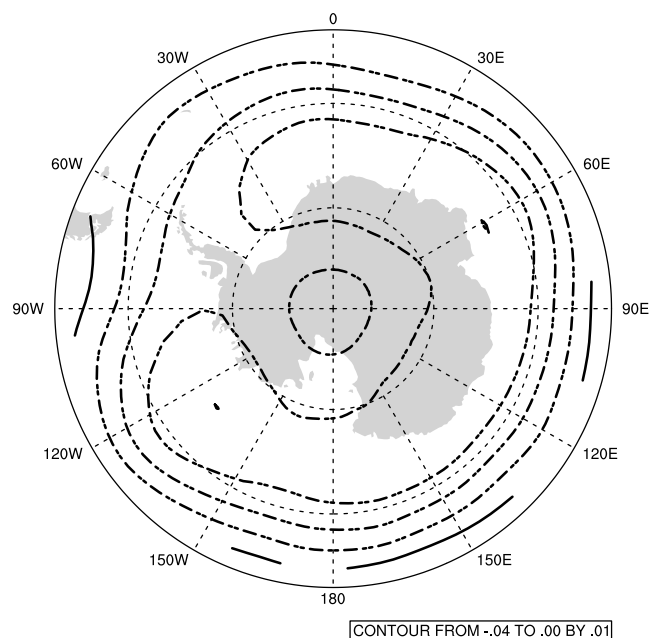

PSA - Advance

23.14%

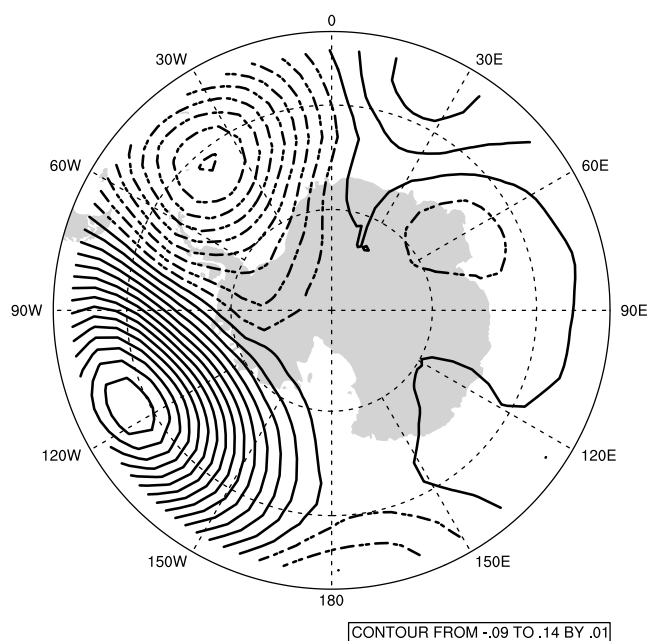

PSA - Retreat

13.69%

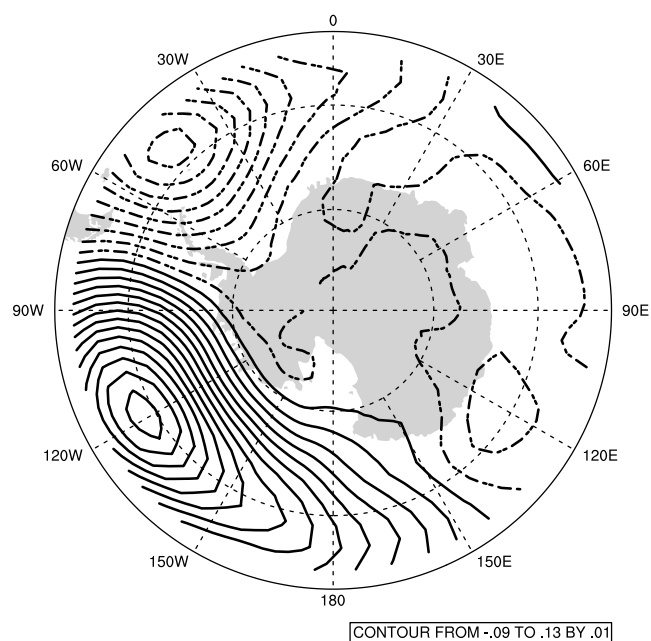

# EOFs of SLP - FGOALS-g2\_r5i1p1

SAM - Advance

38.96%



SAM - Retreat

51.1%



PSA - Advance

21.93%



PSA - Retreat

16.27%



## EOFs of SLP - GFDL-CM3\_r1i1p1

SAM - Advance

37.65%

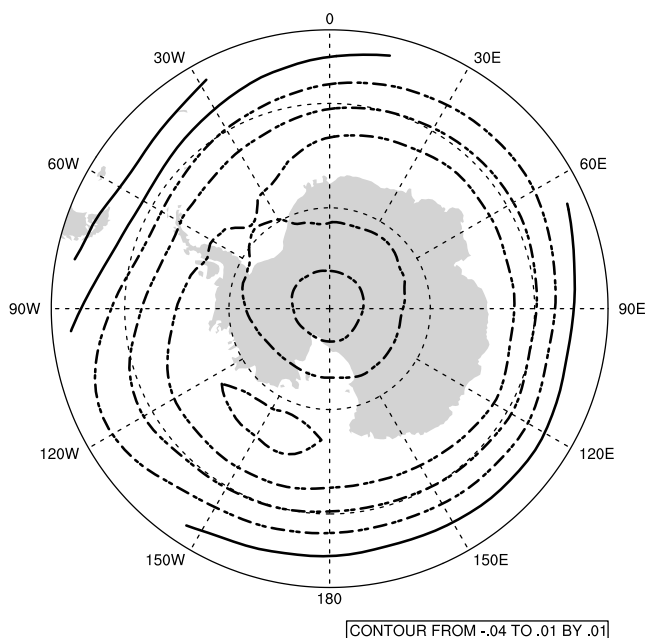

SAM - Retreat

48.44%

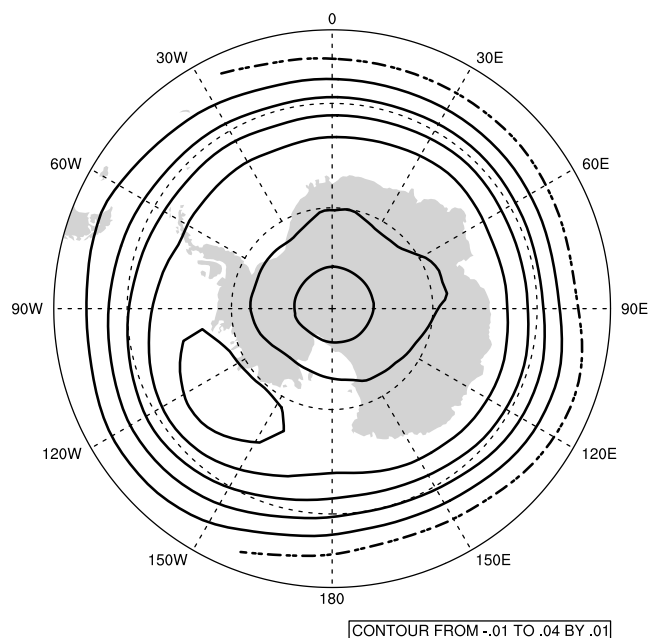

PSA - Advance

26.48%

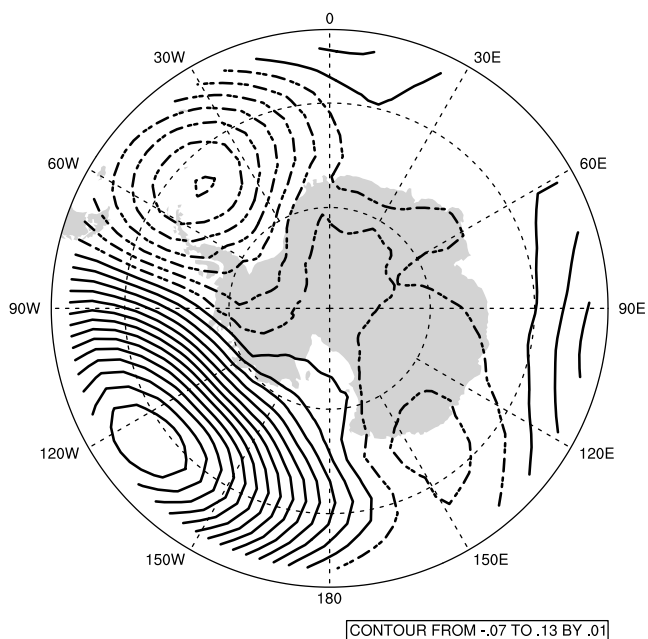

PSA - Retreat

20.85%

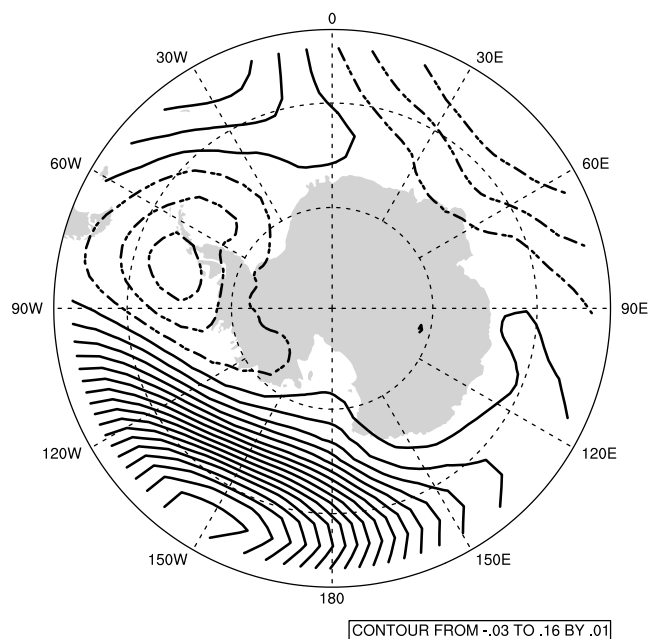

# EOFs of SLP - GFDL-CM3\_r2i1p1

SAM - Advance

40.86%

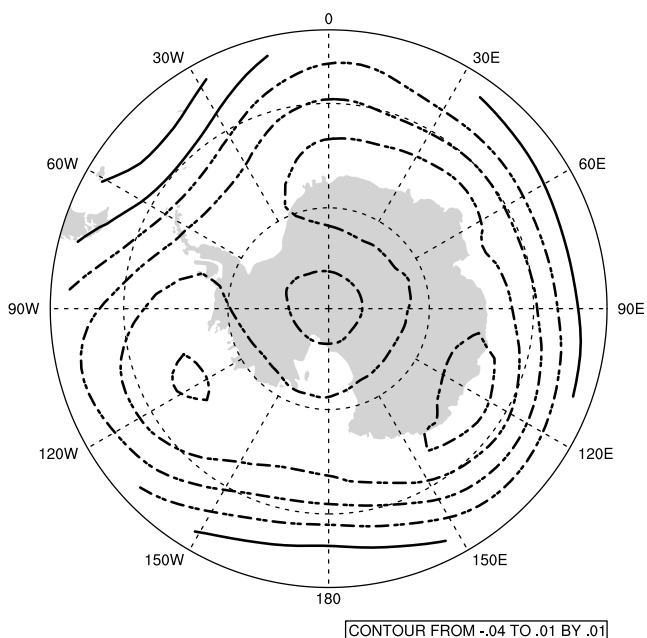

SAM - Retreat

61.99%

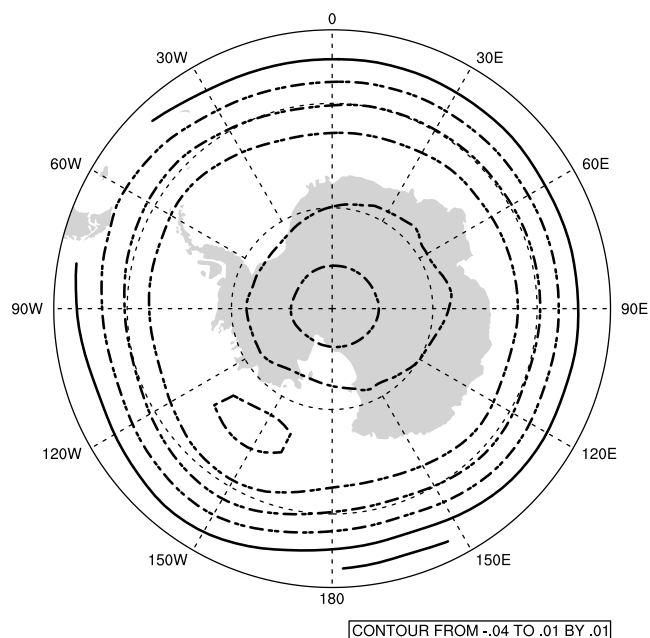

PSA - Advance

23.2%

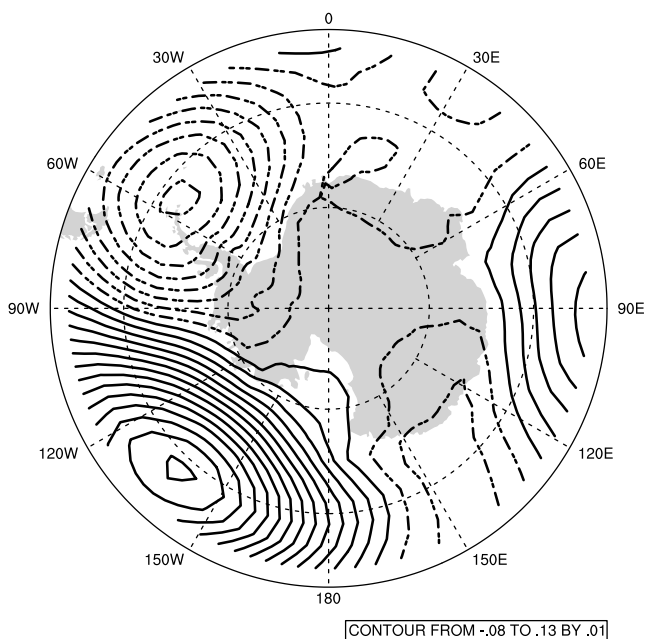

PSA - Retreat

13.24%

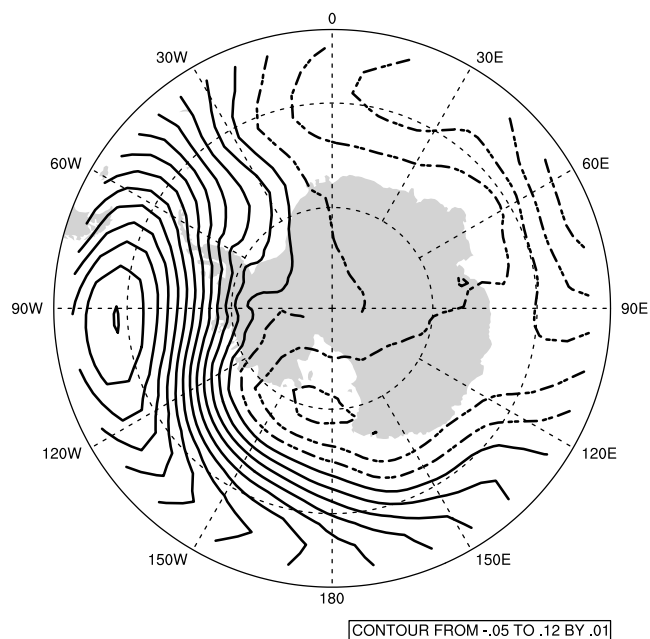

# EOFs of SLP - GFDL-CM3\_r3i1p1

SAM - Advance

36.27%

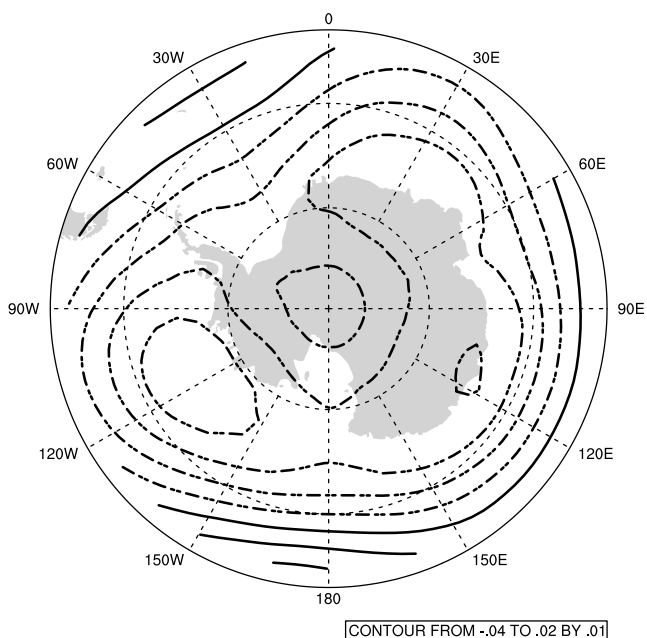

SAM - Retreat

52.97%

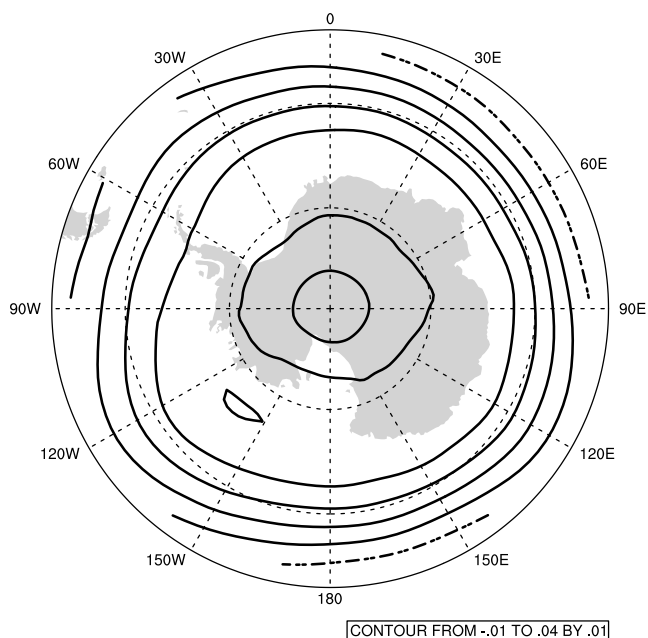

PSA - Advance

26.56%

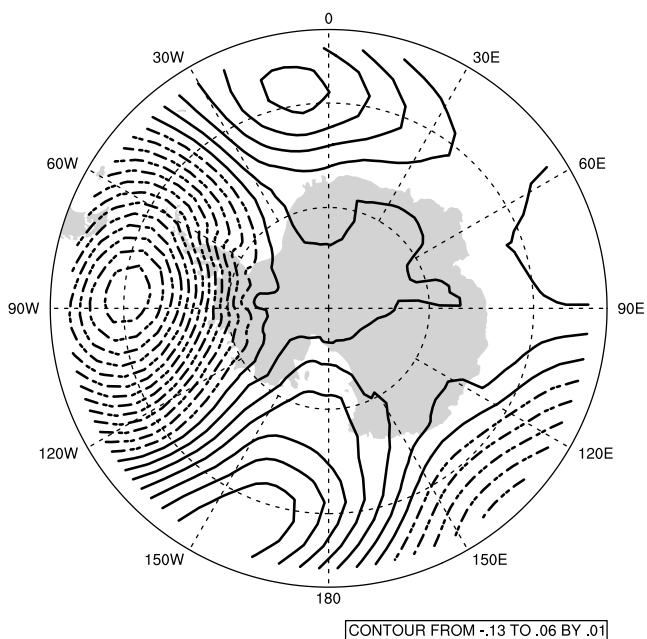

PSA - Retreat

20.74%

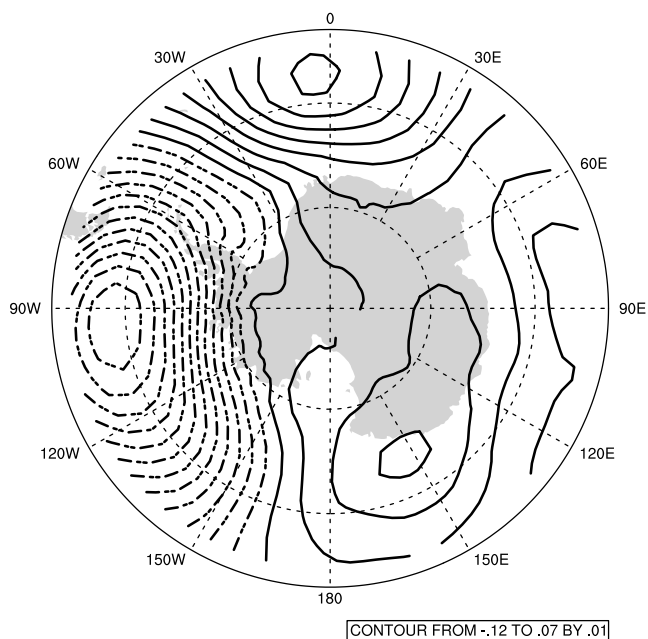

# EOFs of SLP - GFDL-CM3\_r4i1p1

SAM - Advance

39.96%

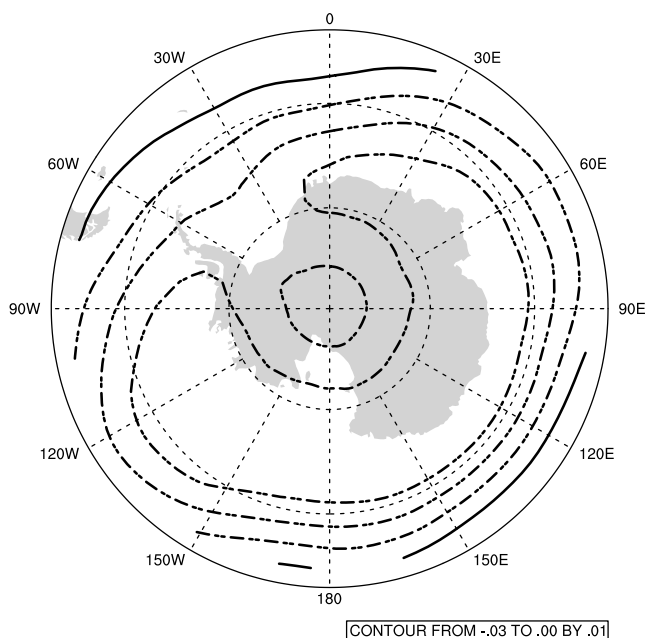

SAM - Retreat

50.98%

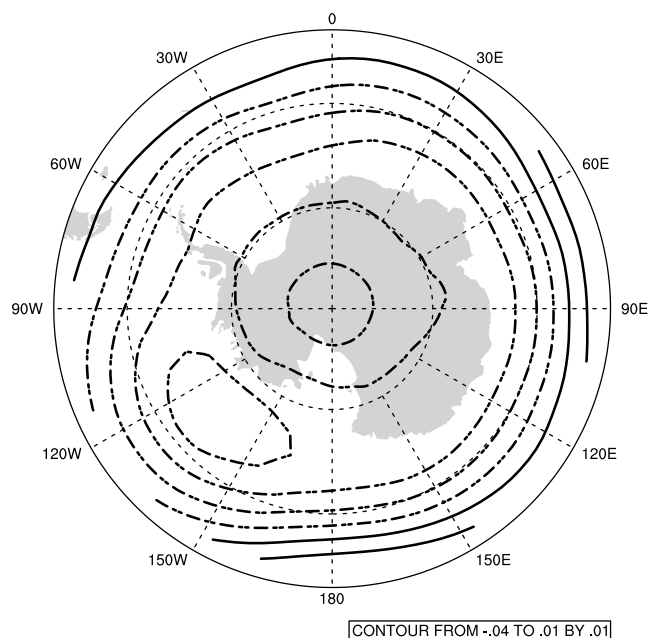

PSA - Advance

27.05%

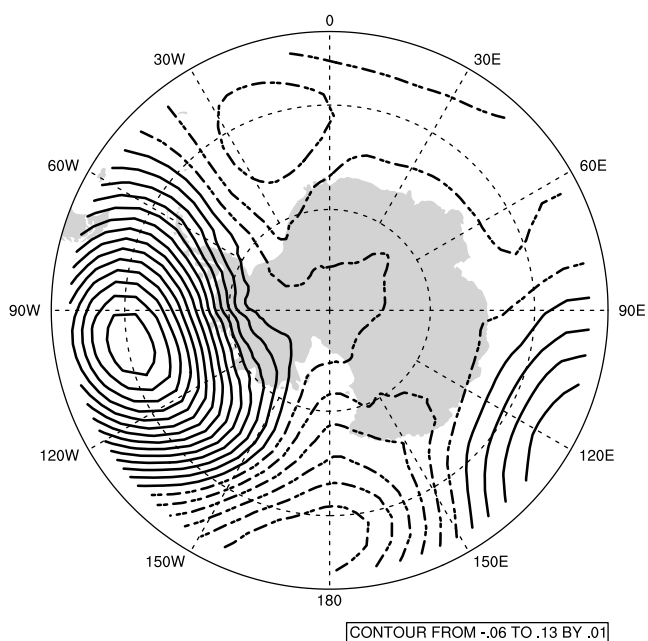

PSA - Retreat

21.65%

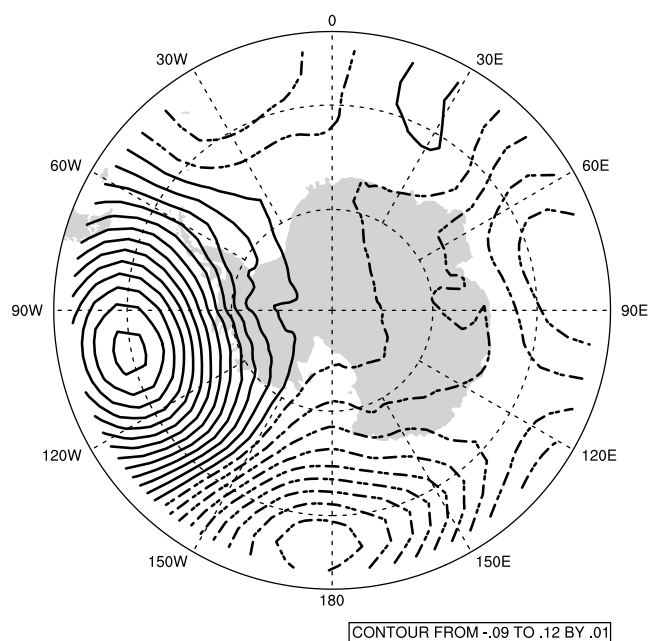



# EOFs of SLP - GFDL-CM3\_r5i1p1

SAM - Advance

35.51%

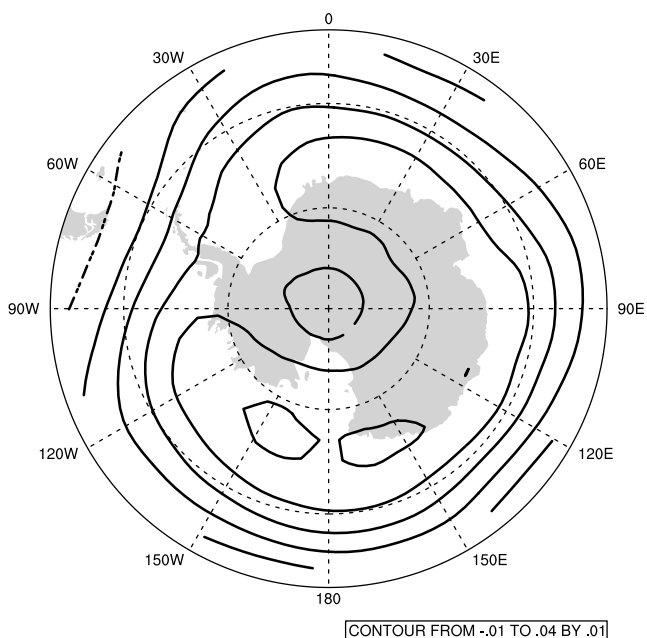

SAM - Retreat

53.79%

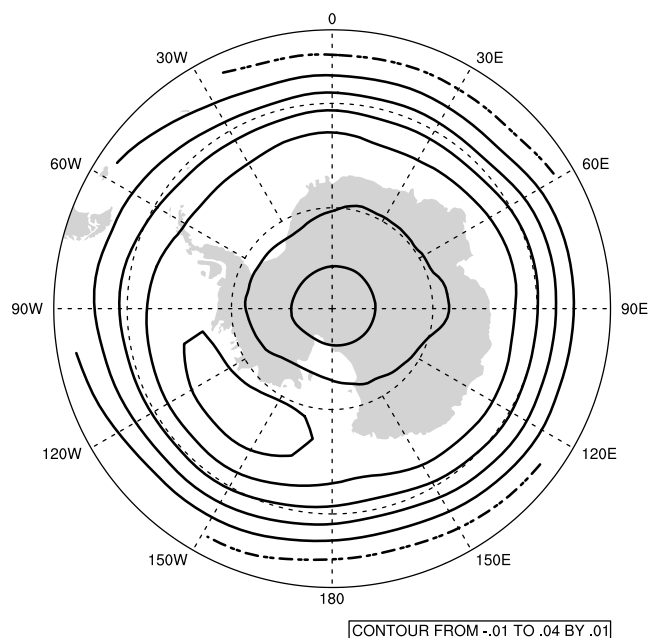

PSA - Advance

25.88%

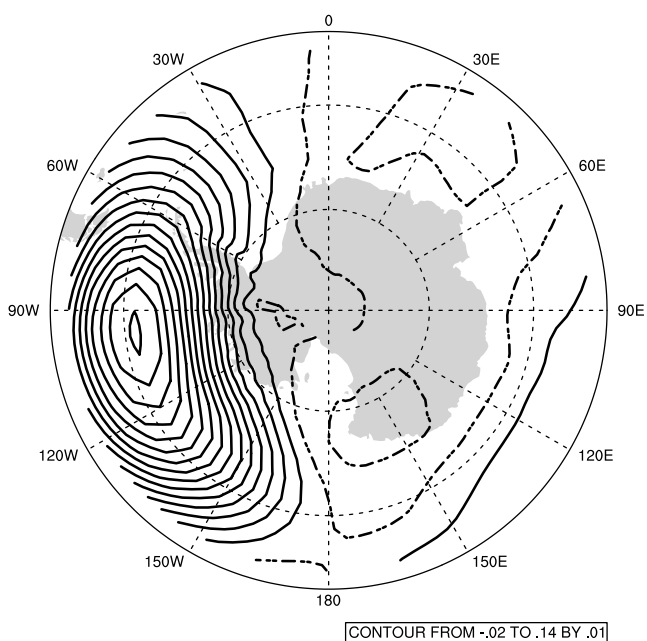

PSA - Retreat

19.9%

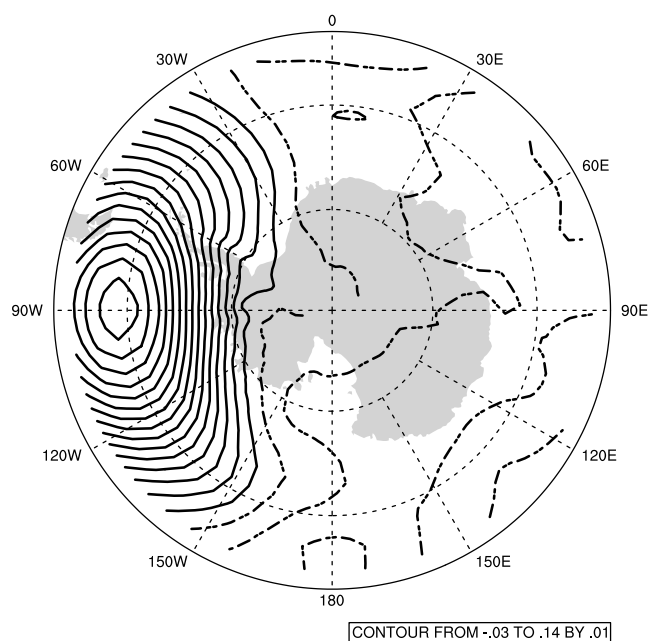

# EOFs of SLP - IPSL-CM5A-LR\_r1i1p1

SAM - Advance

54.74%

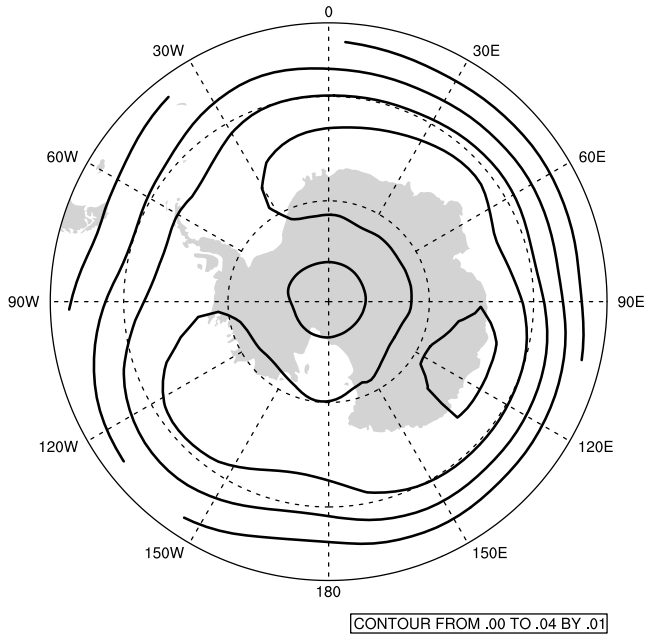

SAM - Retreat

66.05%

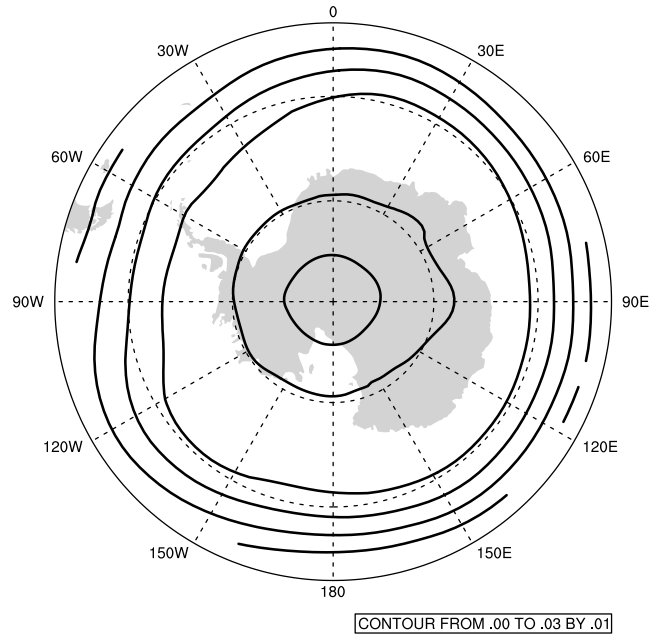

PSA - Advance

15.45%

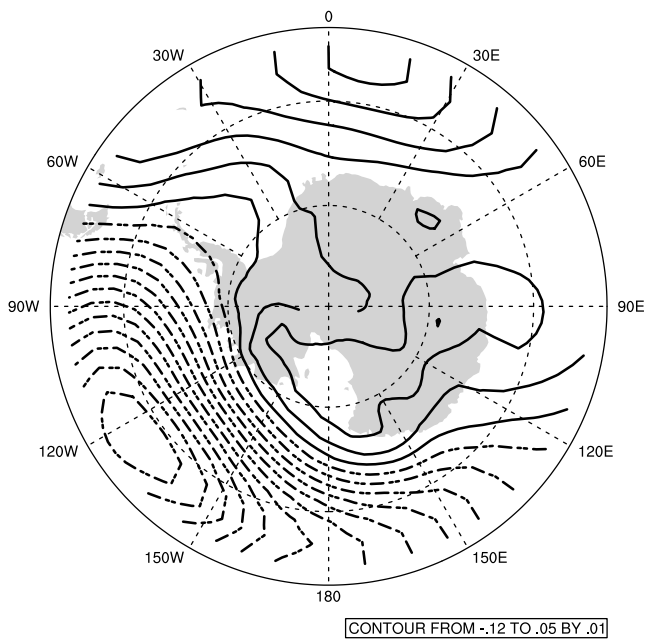

PSA - Retreat

12.26%

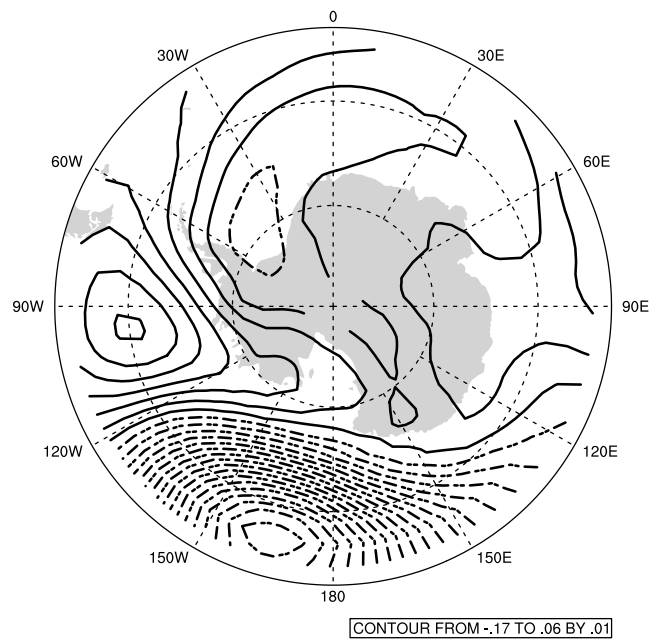

# EOFs of SLP - IPSL-CM5A-LR\_r2i1p1

SAM - Advance

49.29%

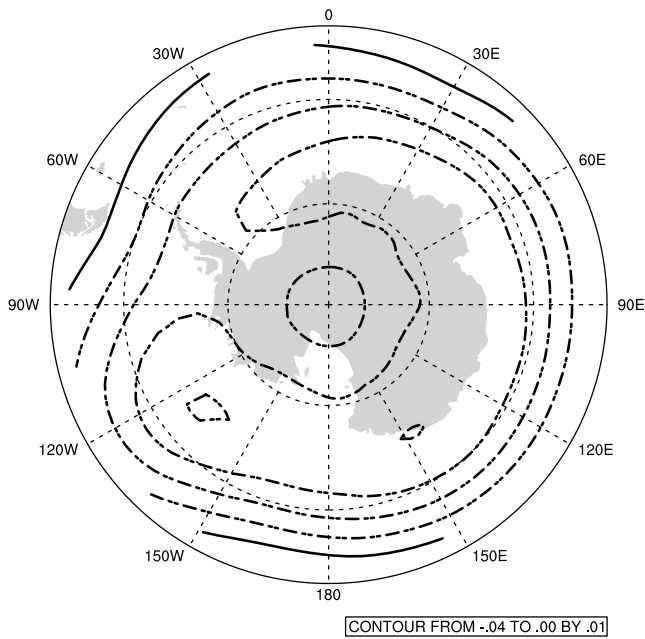

SAM - Retreat

68.39%

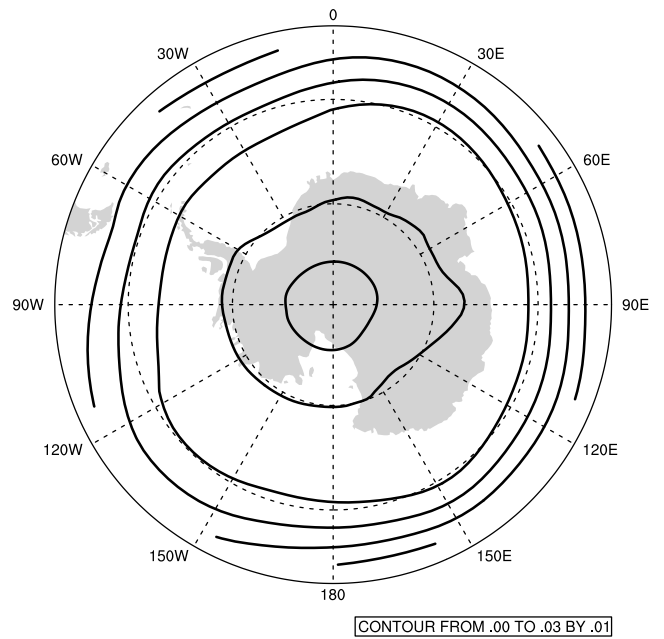

PSA - Advance

17.74%

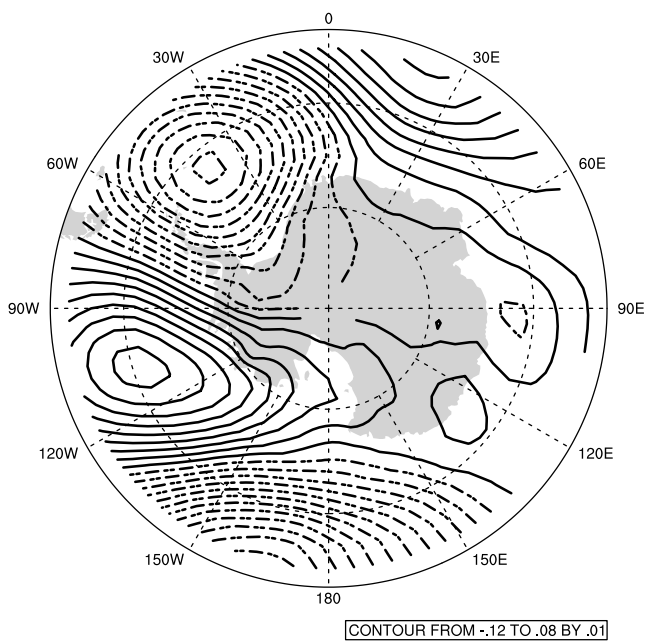

PSA - Retreat

11.55%

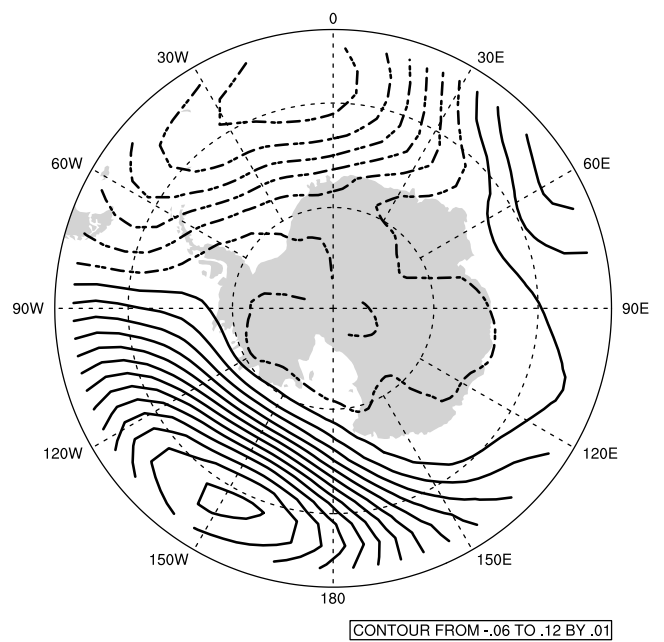

# EOFs of SLP - IPSL-CM5A-LR\_r3i1p1

SAM - Advance

54.54%

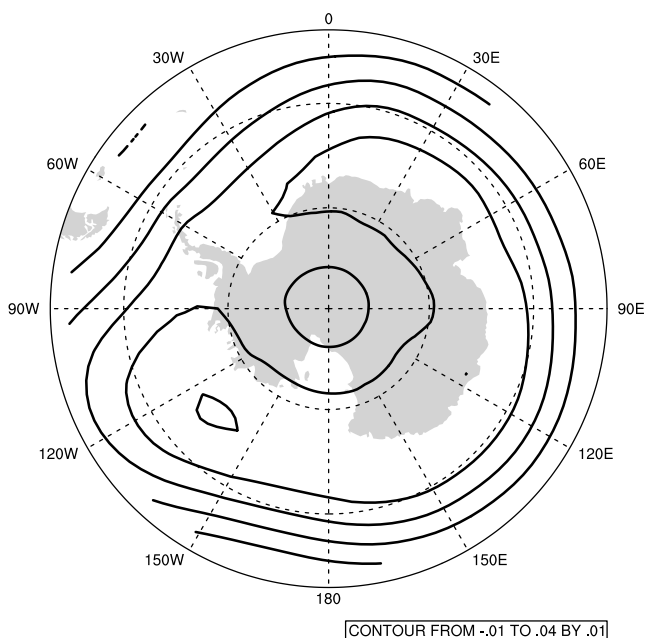

SAM - Retreat

68.71%

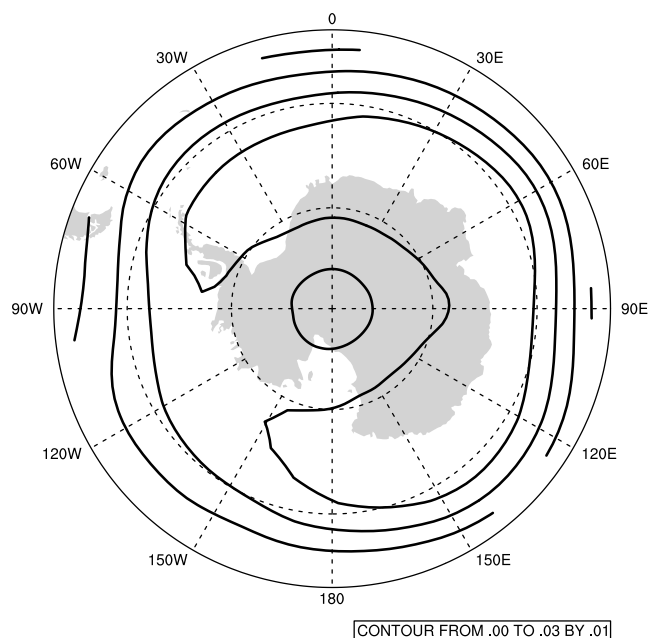

PSA - Advance

16.03%

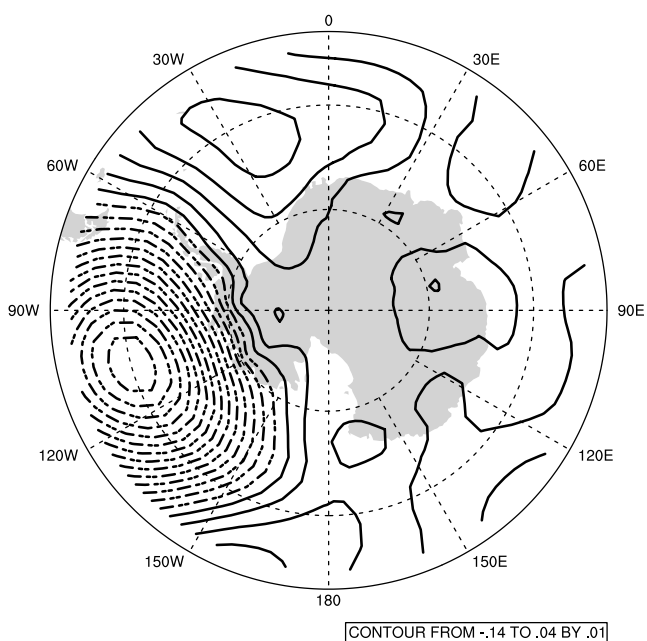

PSA - Retreat

11.69%

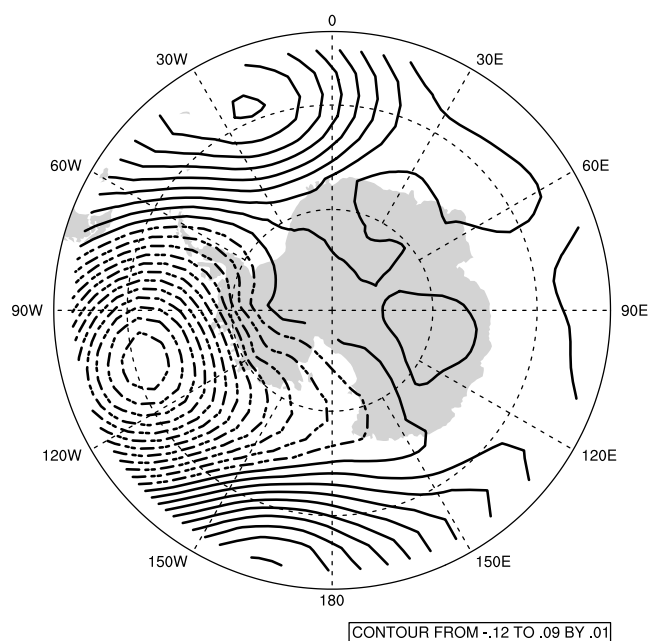

# EOFs of SLP - IPSL-CM5A-LR\_r4i1p1

SAM - Advance

52.29%

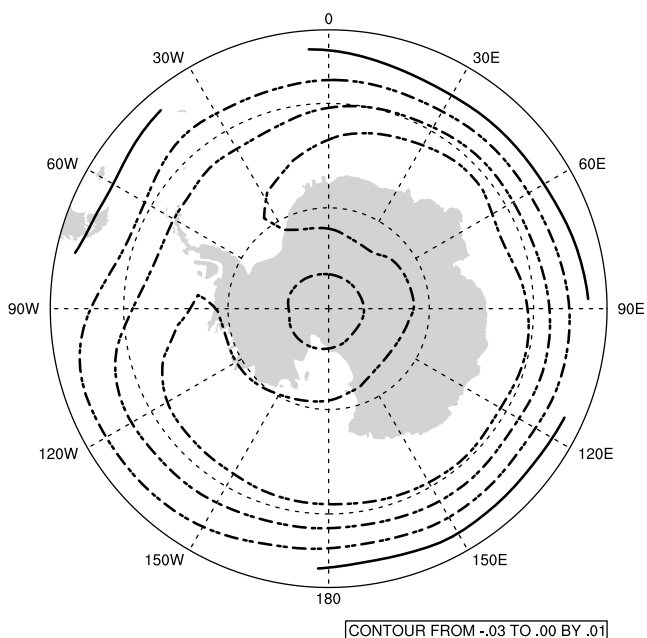

SAM - Retreat

69.61%

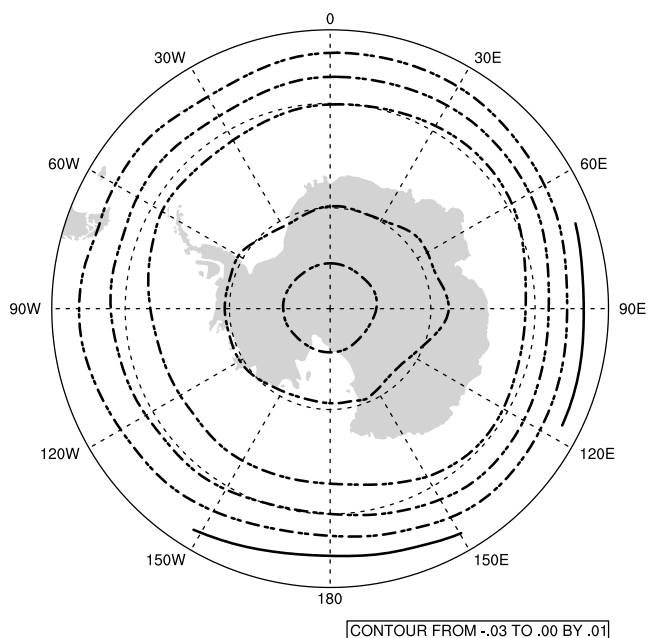

PSA - Advance

16.34%

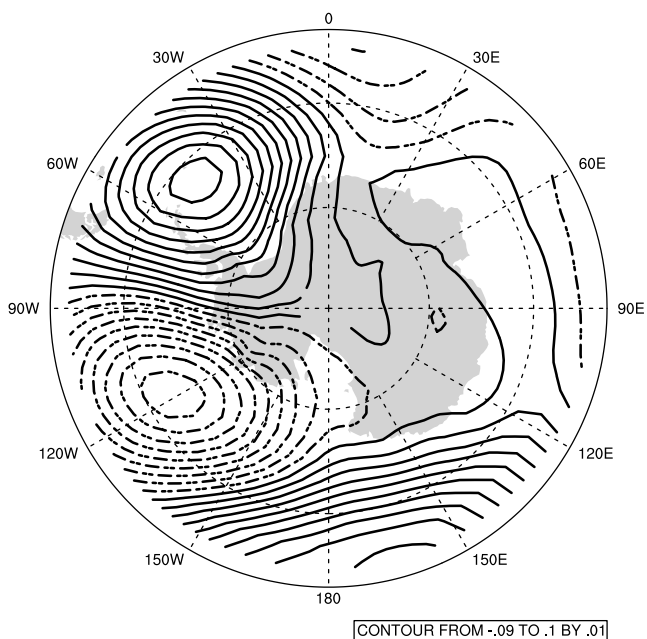

PSA - Retreat

10.03%

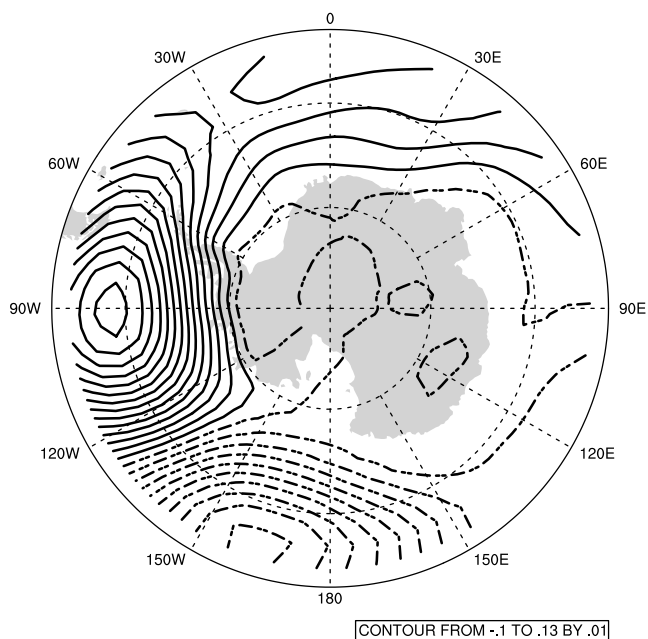

# EOFs of SLP - IPSL-CM5A-LR\_r5i1p1

SAM - Advance

58.76%

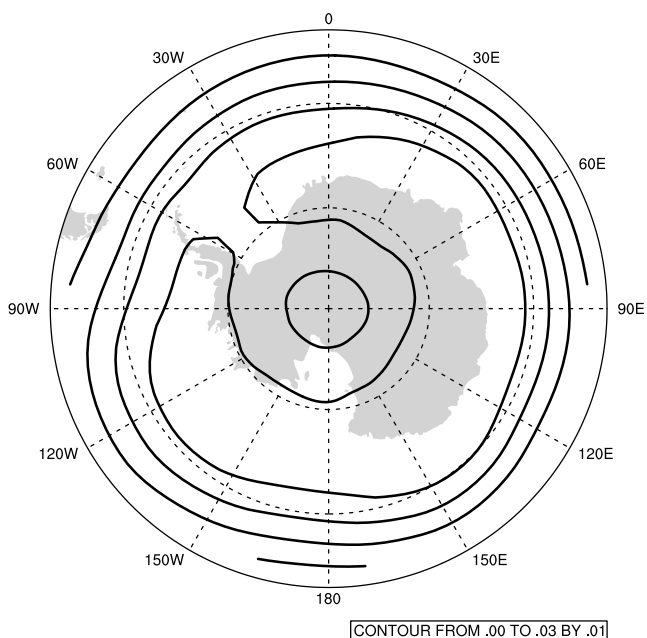

SAM - Retreat

63.92%

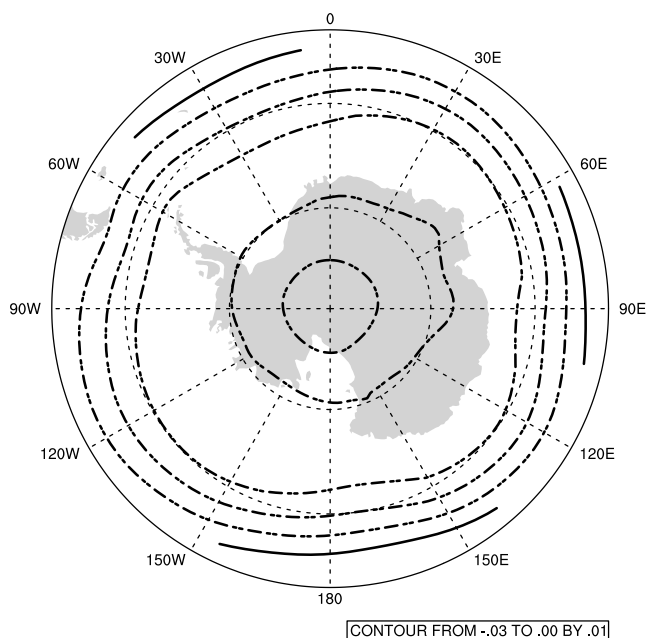

PSA - Advance

15%

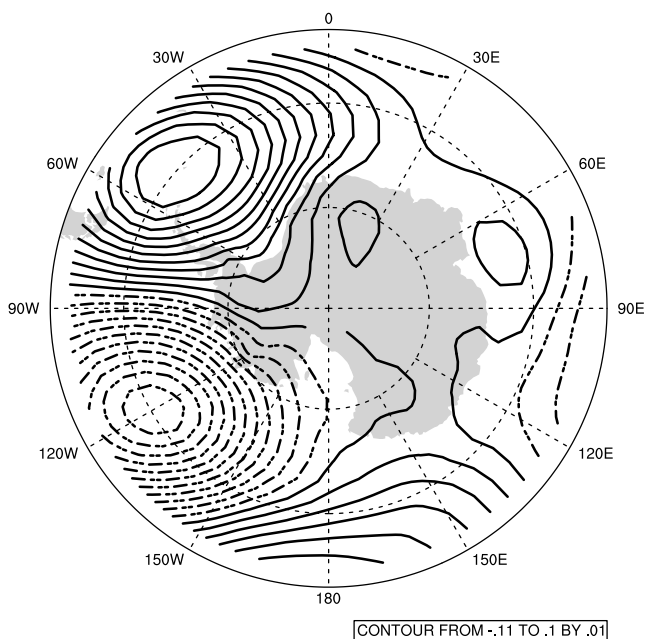

PSA - Retreat

13.22%

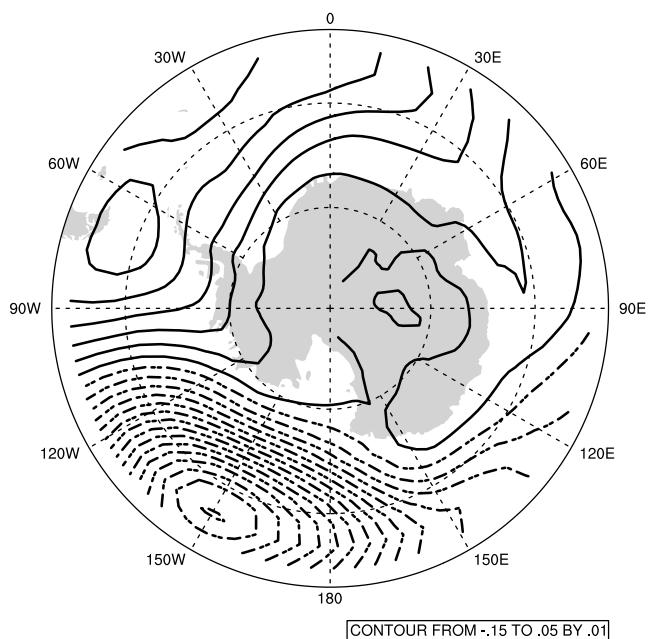

# EOFs of SLP - IPSL-CM5A-LR\_r6i1p1

SAM - Advance

50.65%

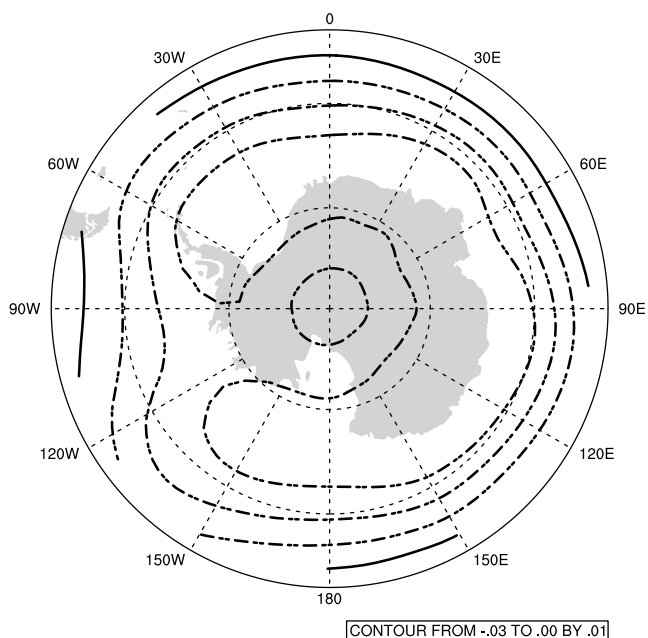

SAM - Retreat

68.61%

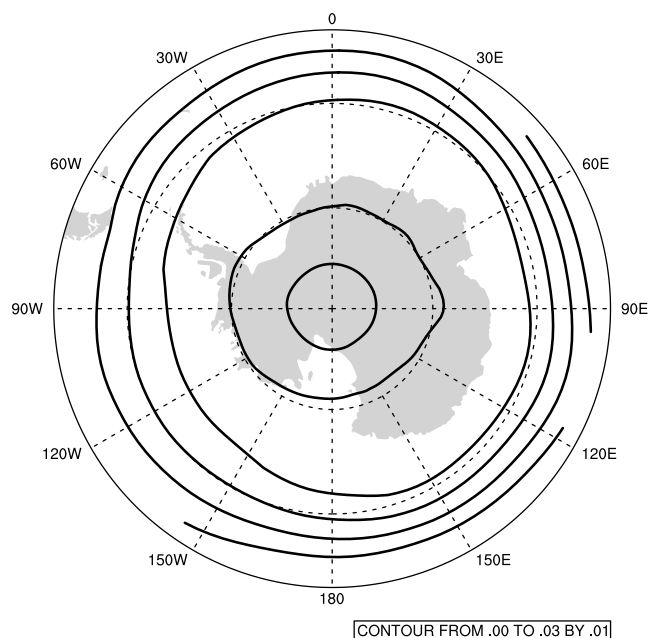

PSA - Advance

17.79%

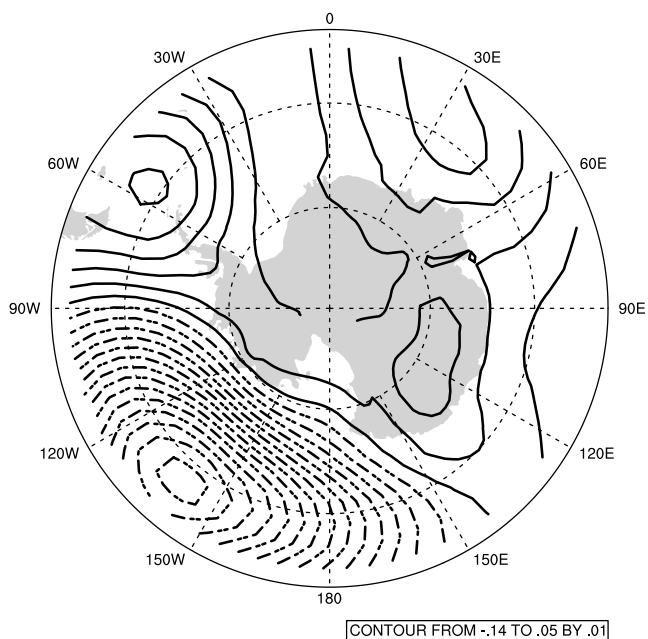

PSA - Retreat

12.01%

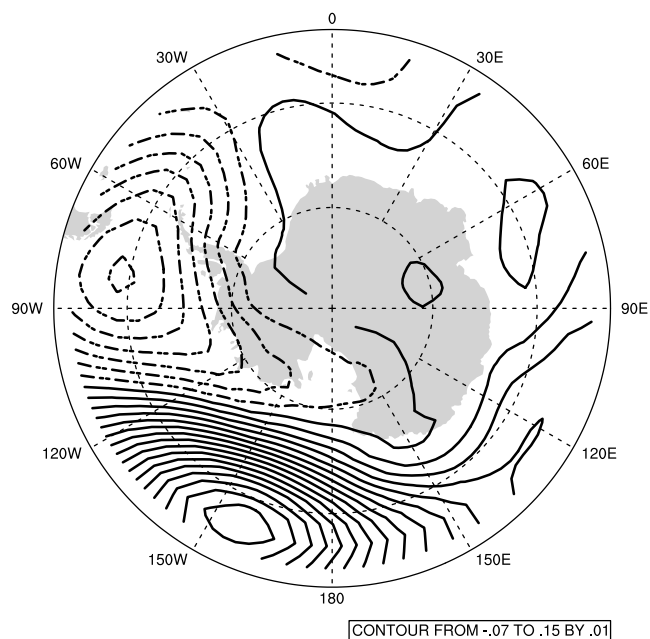

# EOFs of SLP - IPSL-CM5A-MR\_r1i1p1

SAM - Advance

46.51%

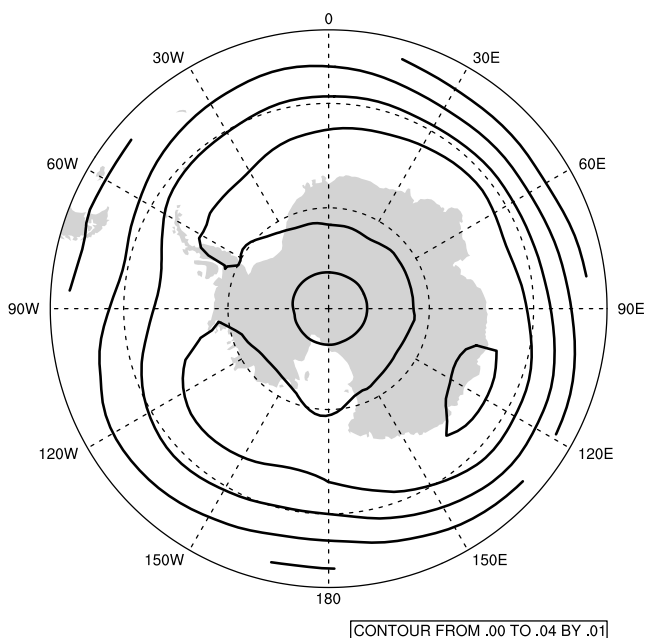

SAM - Retreat

67.08%

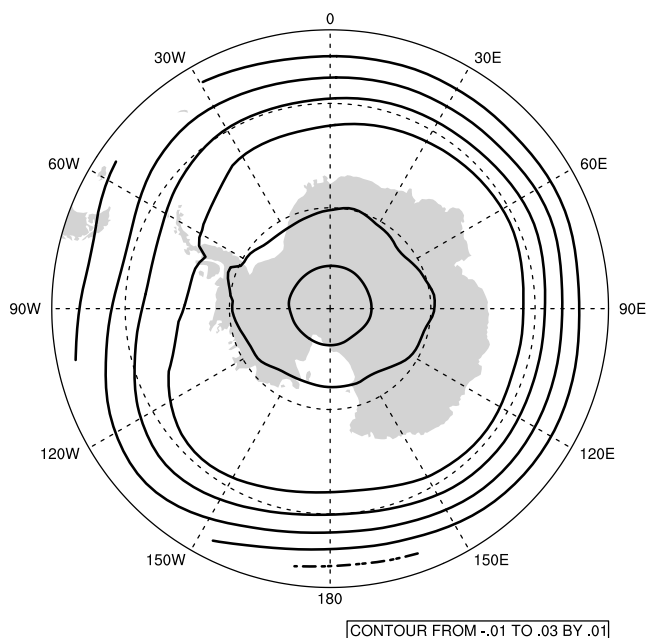

PSA - Advance

18.69%

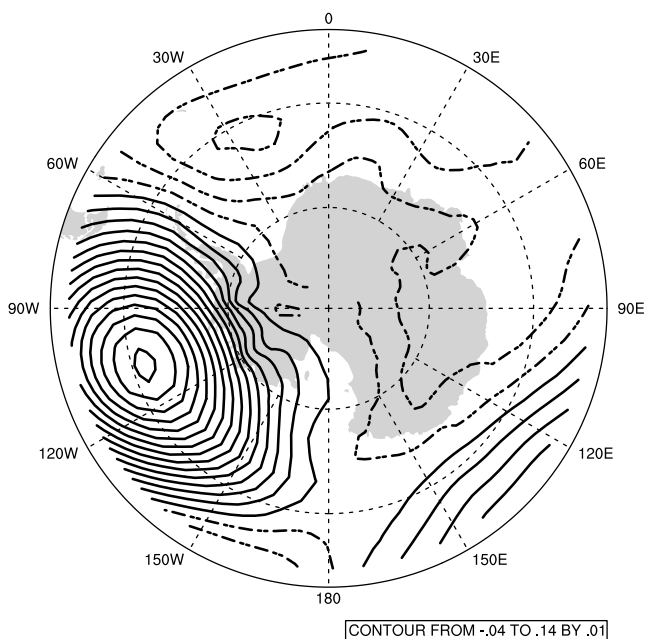

PSA - Retreat

12.5%

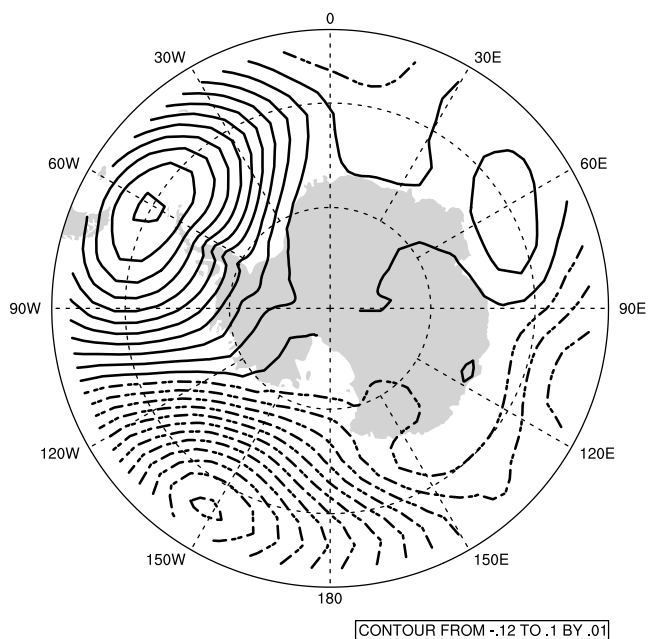



# EOFs of SLP - IPSL-CM5A-MR\_r2i1p1

SAM - Advance 49.83%

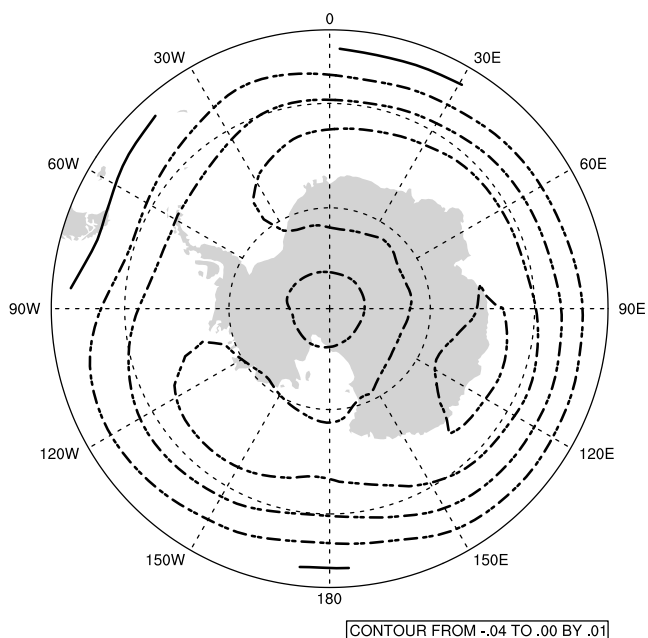

SAM - Retreat 58.23%

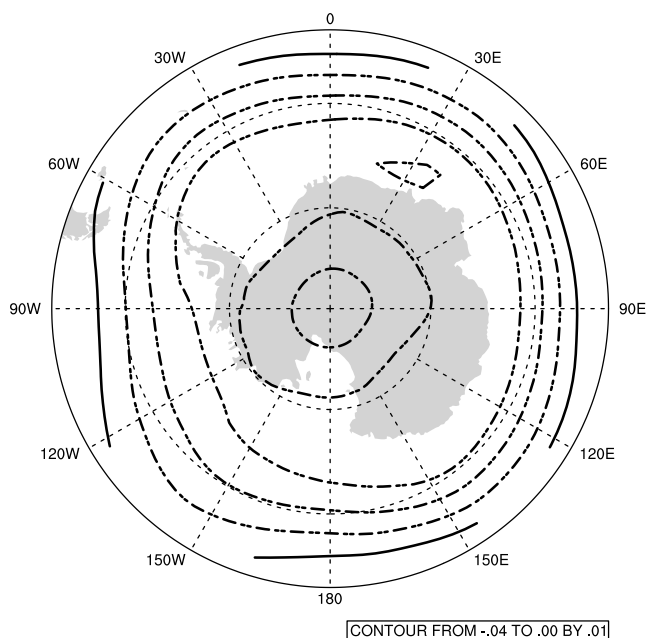

PSA - Advance 18.69%

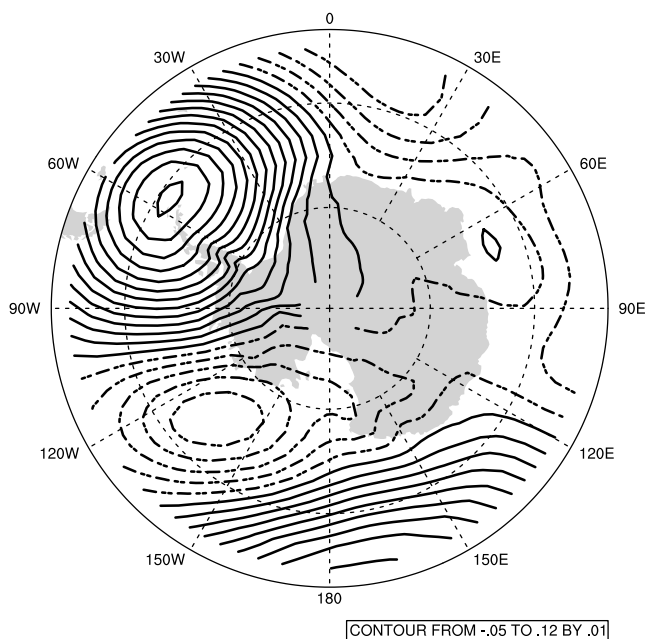

PSA - Retreat 15.11%

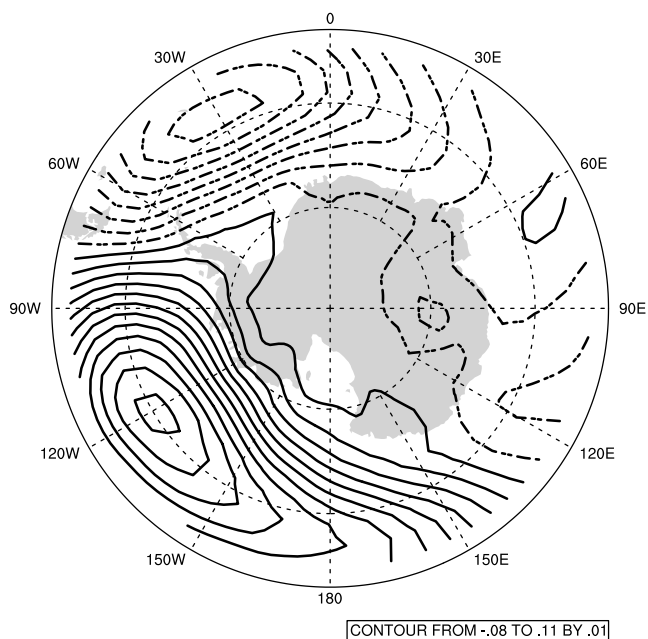

# EOFs of SLP - IPSL-CM5A-MR\_r3i1p1

SAM - Advance 40.98%

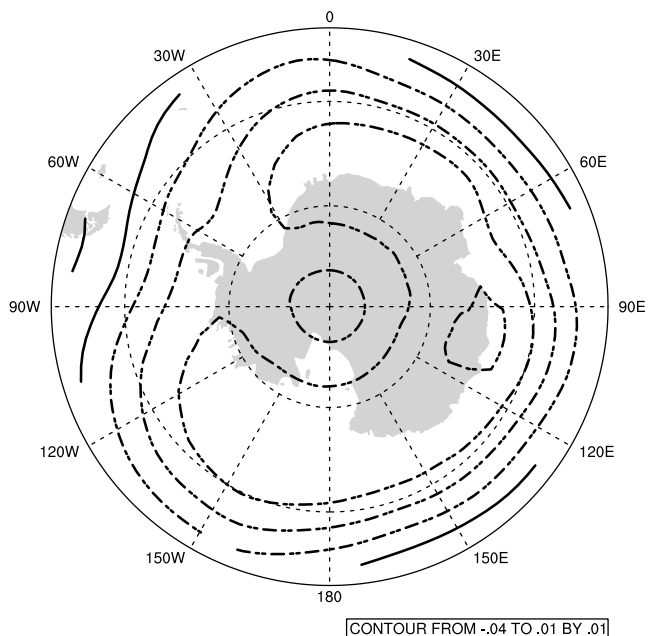

SAM - Retreat 60.2%

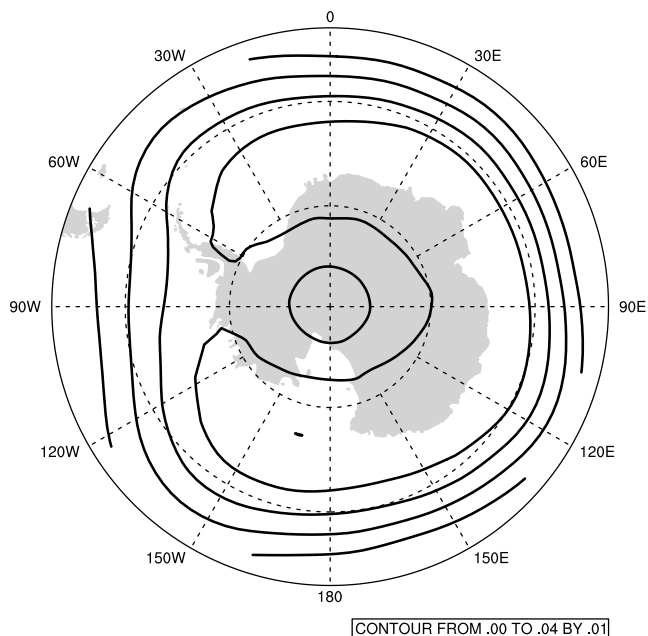

PSA - Advance 22.27%

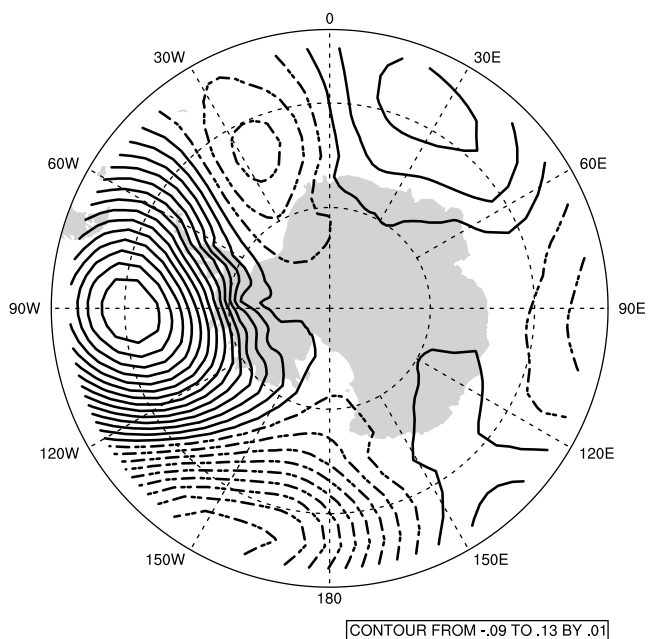

PSA - Retreat 15.15%

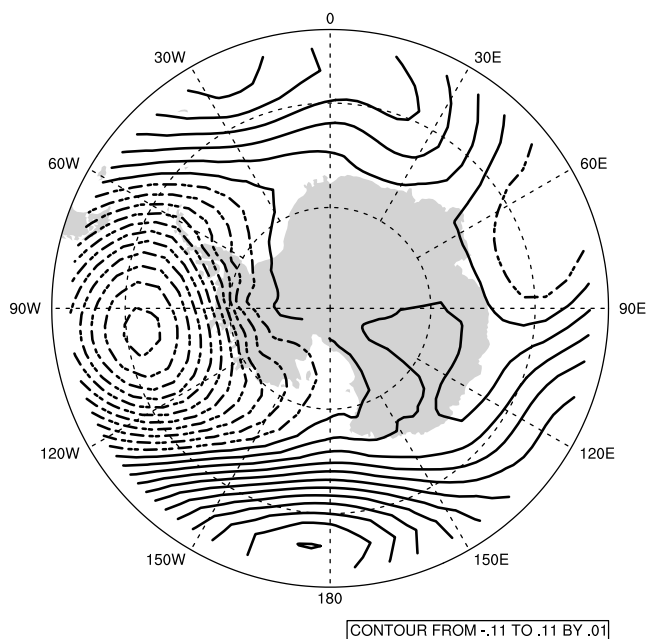

EOFs of SLP - MIROC5\_r1i1p1

SAM - Advance 38.88%

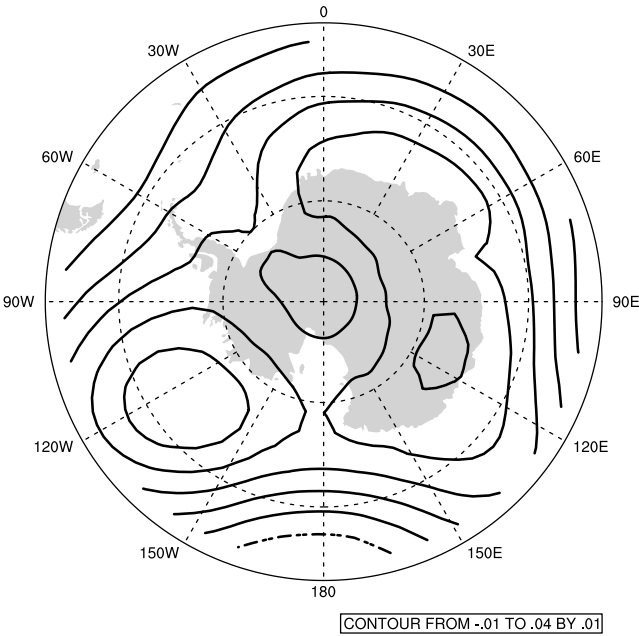

SAM - Retreat 55.79%

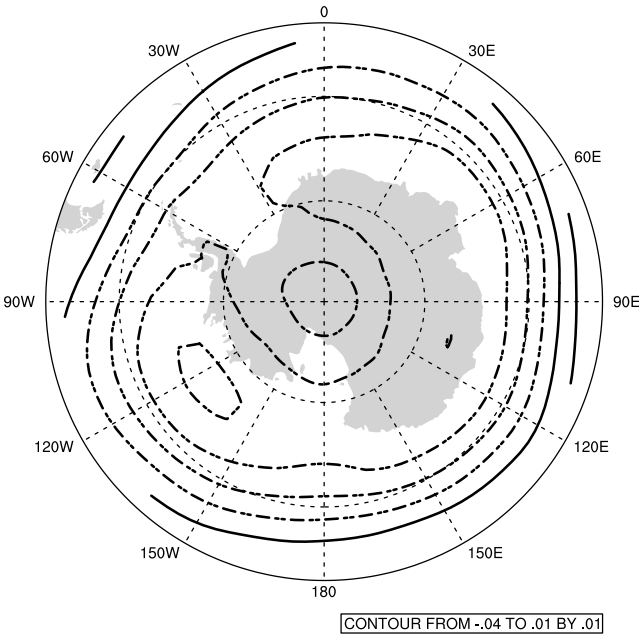

PSA - Advance 21.97%

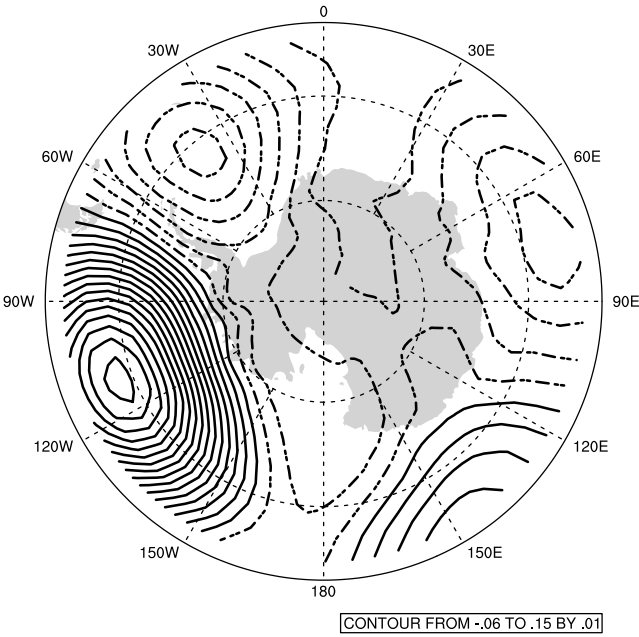

PSA - Retreat 15.6%

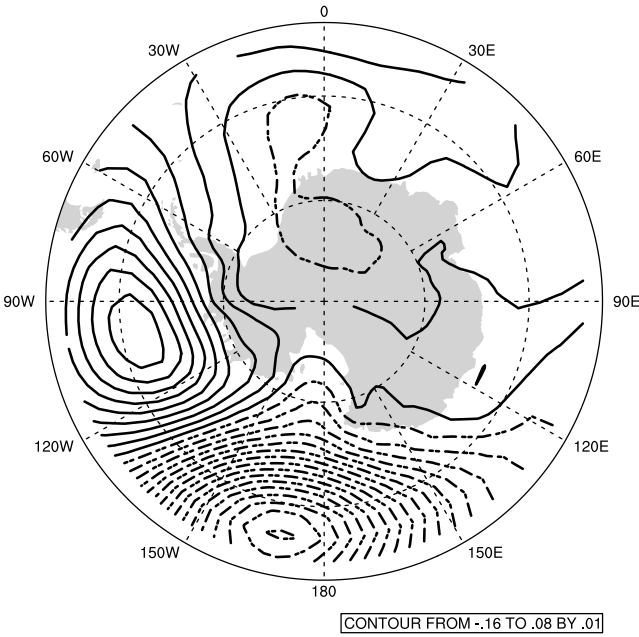

EOFs of SLP - MIROC5\_r2i1p1

SAM - Advance 43.72%

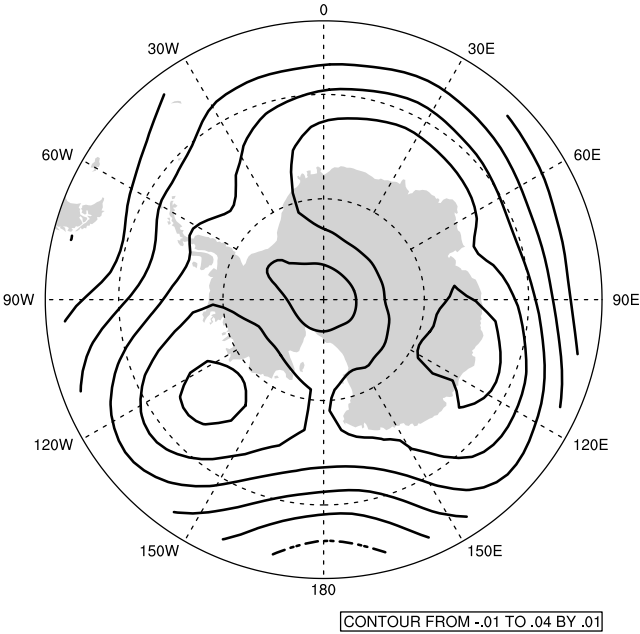

SAM - Retreat 60.09%

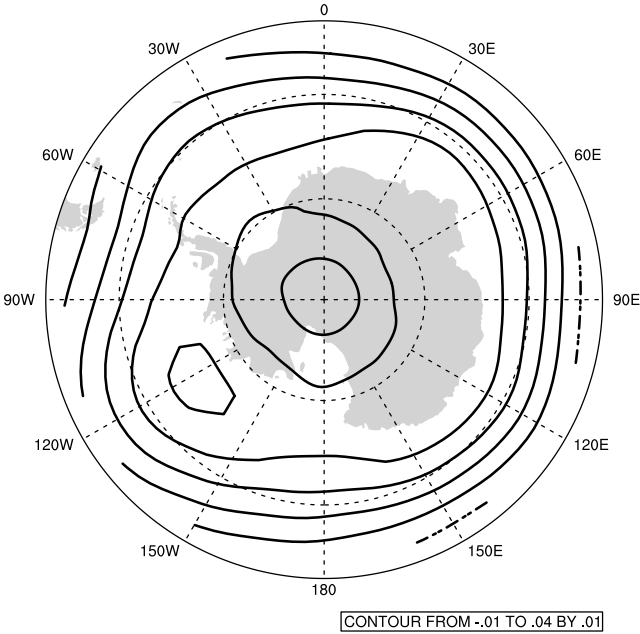

PSA - Advance 19.87%

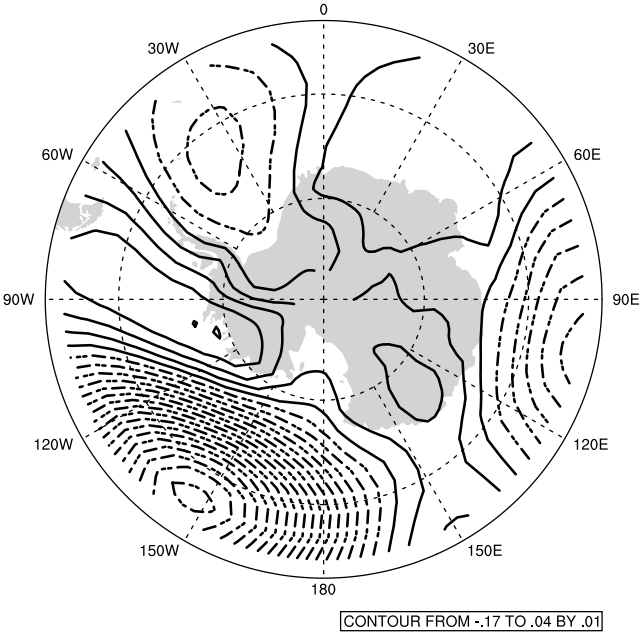

PSA - Retreat 14.07%

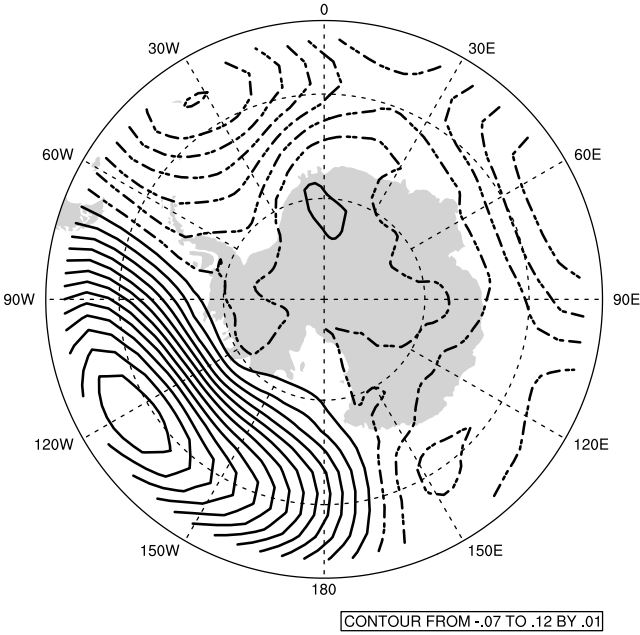

EOFs of SLP - MIROC5\_r3i1p1

SAM - Advance 38.05%

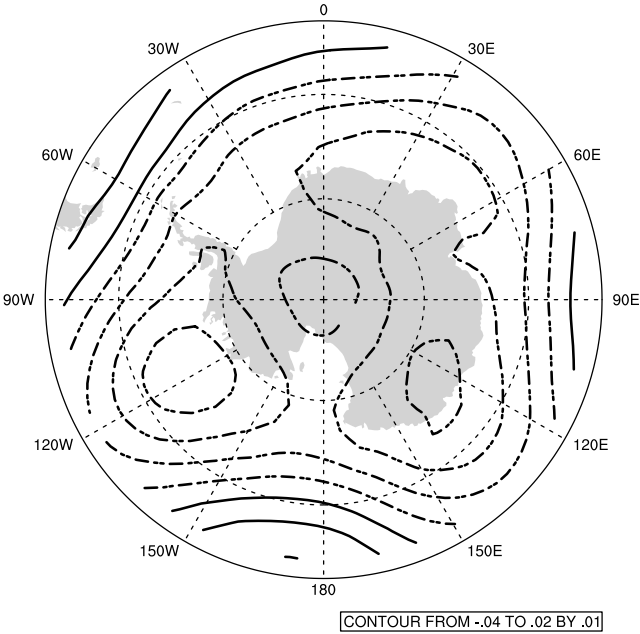

SAM - Retreat 48.29%

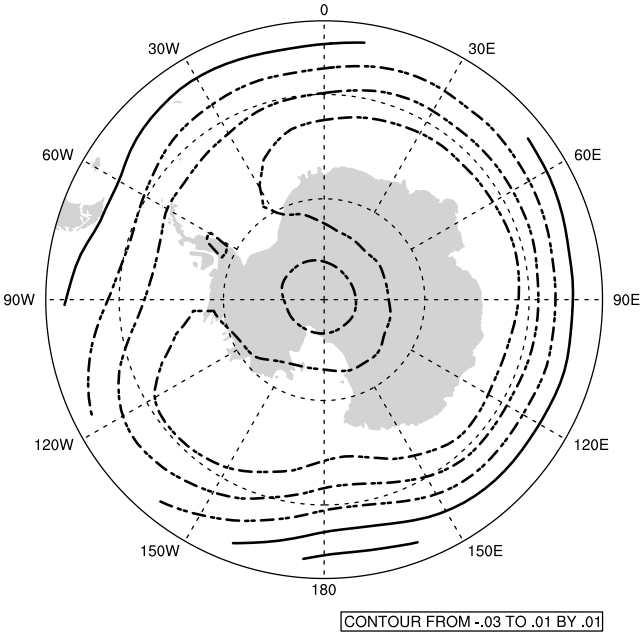

PSA - Advance 21.39%

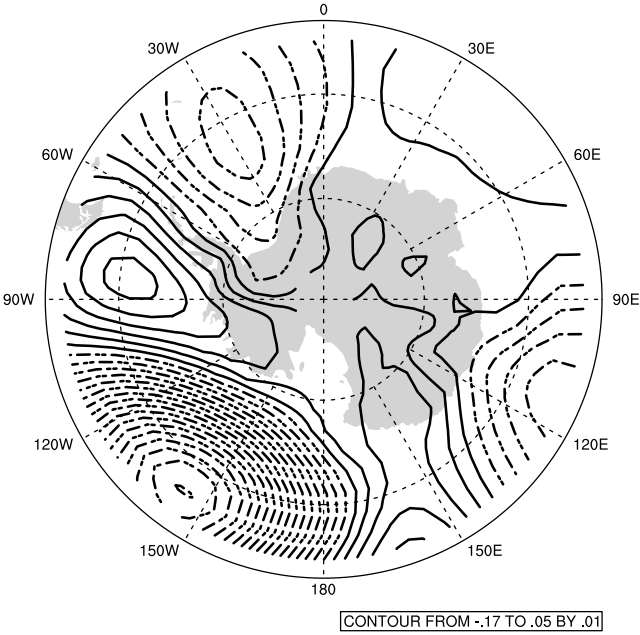

PSA - Retreat 18.97%

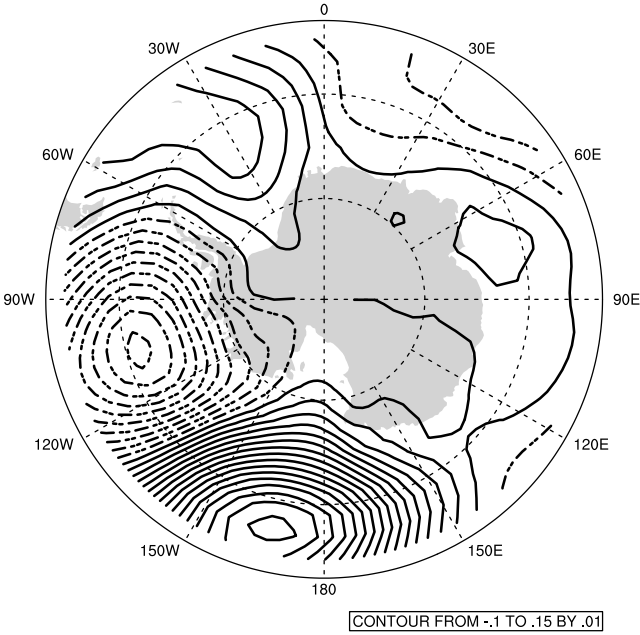

## EOFs of SLP - MIROC5\_r4i1p1

SAM - Advance

46.39%

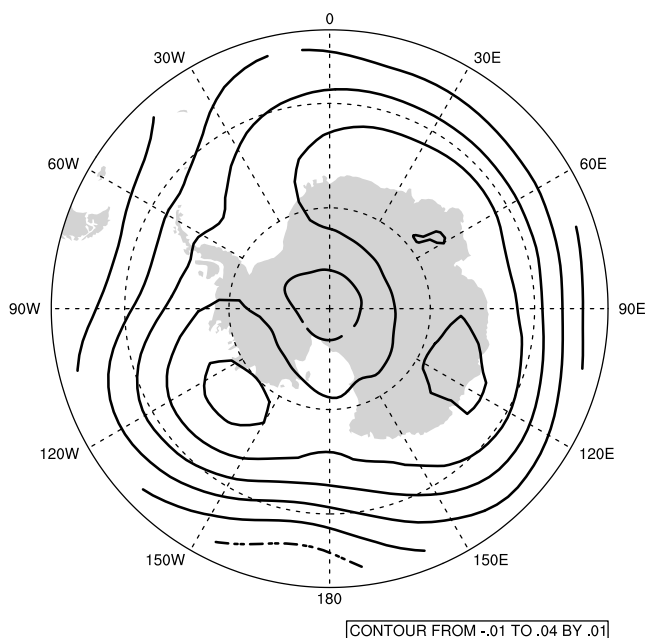

SAM - Retreat

53.22%

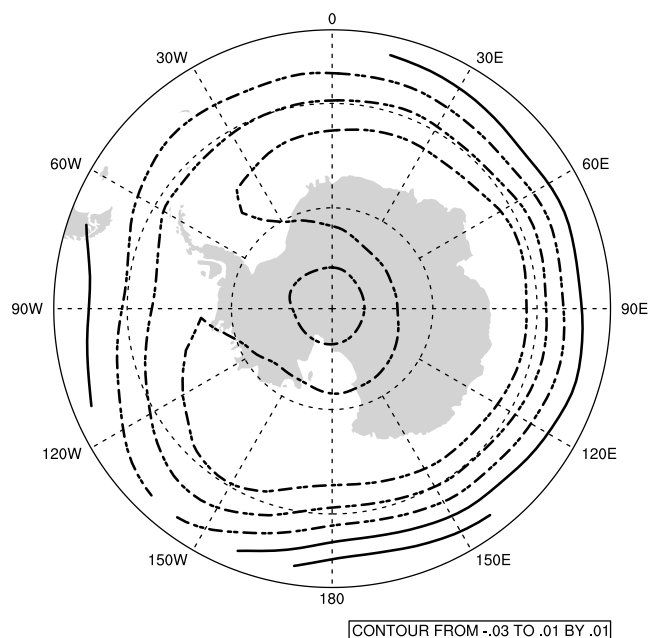

PSA - Advance

17.38%

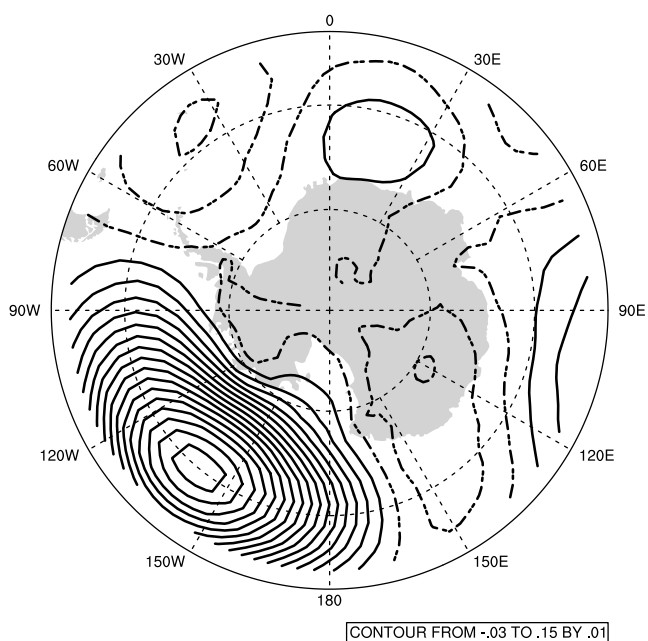

PSA - Retreat

15.44%

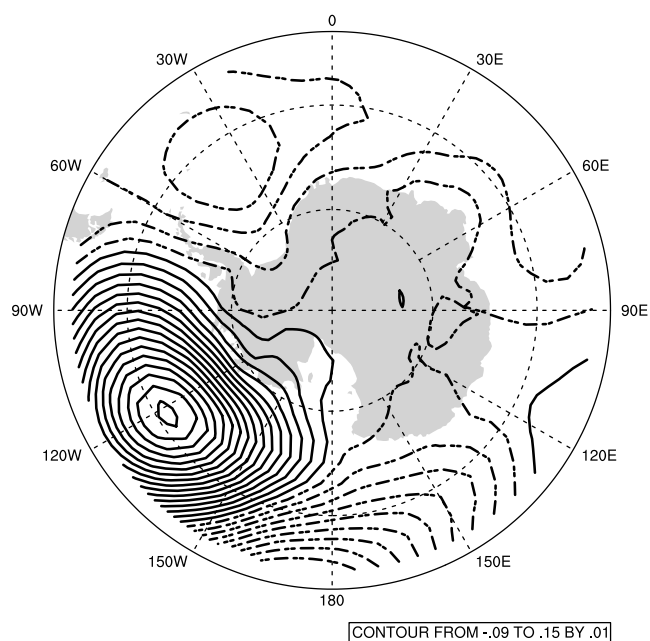

EOFs of SLP - MIROC5\_r5i1p1

SAM - Advance 37.75%

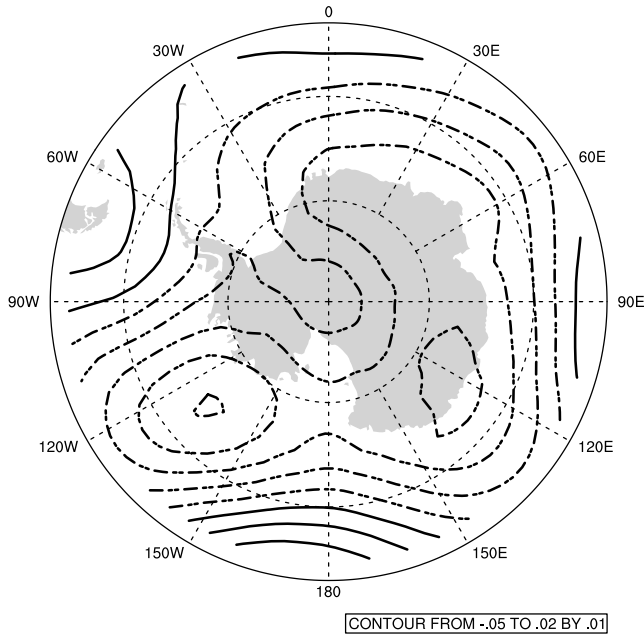

SAM - Retreat 45.52%

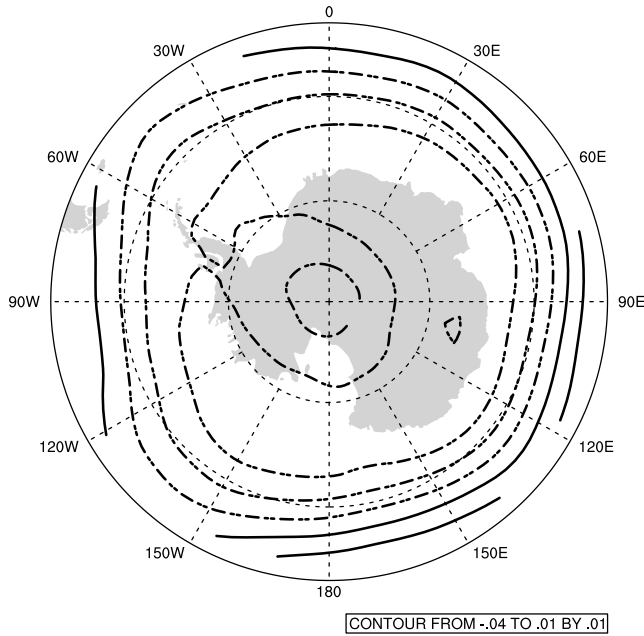

PSA - Advance 20.4%

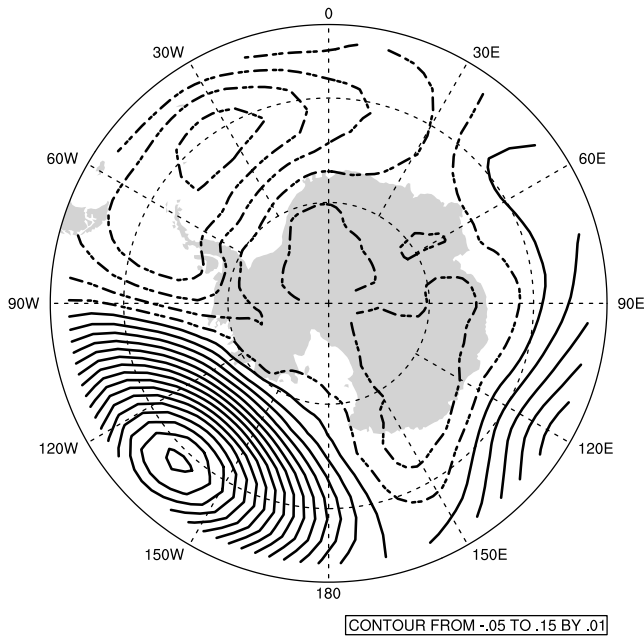

PSA - Retreat 20.14%

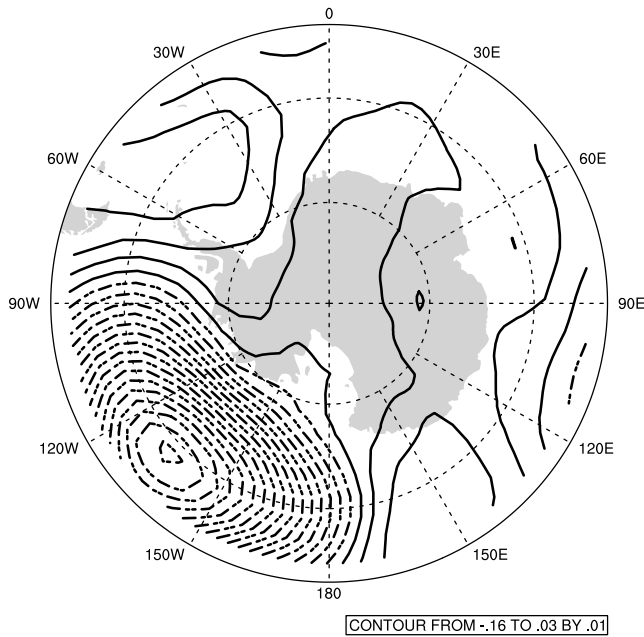

## EOFs of SLP - MPI-ESM-LR\_r1i1p1

SAM - Advance

41.64%

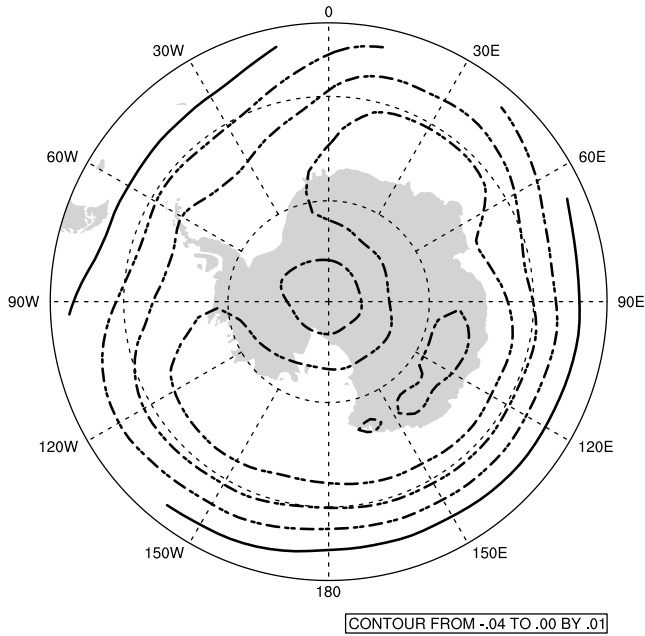

SAM - Retreat

52.96%

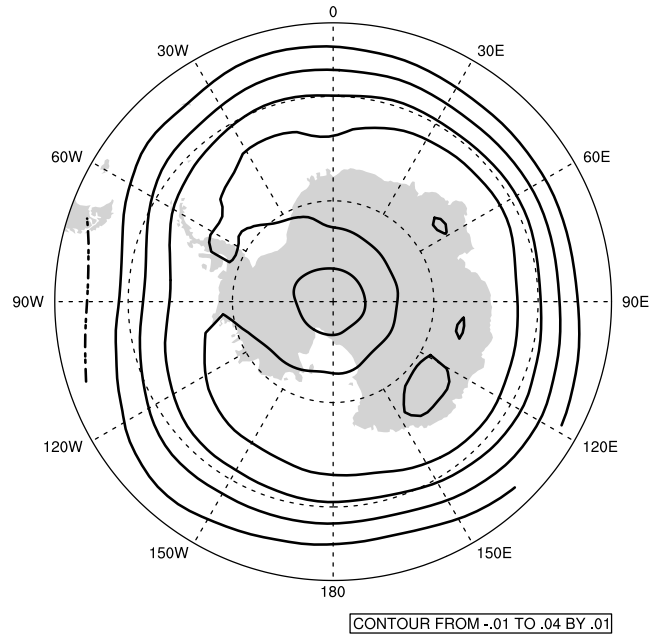

PSA - Advance

24.39%

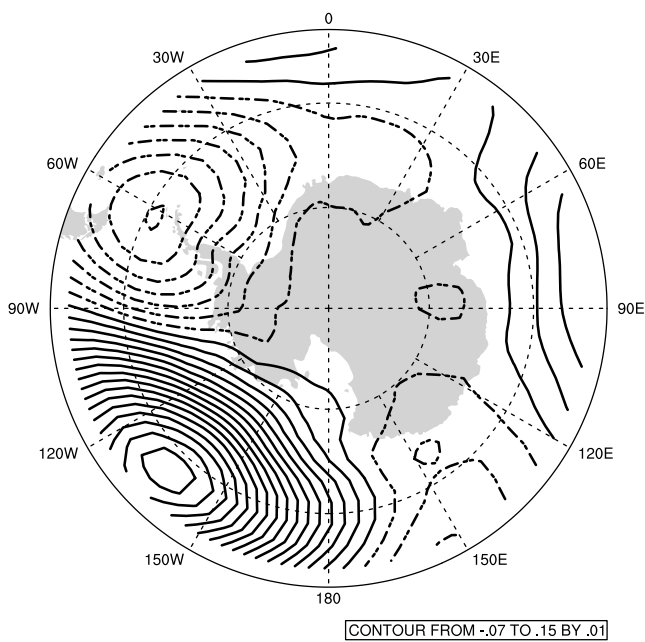

PSA - Retreat

16.16%

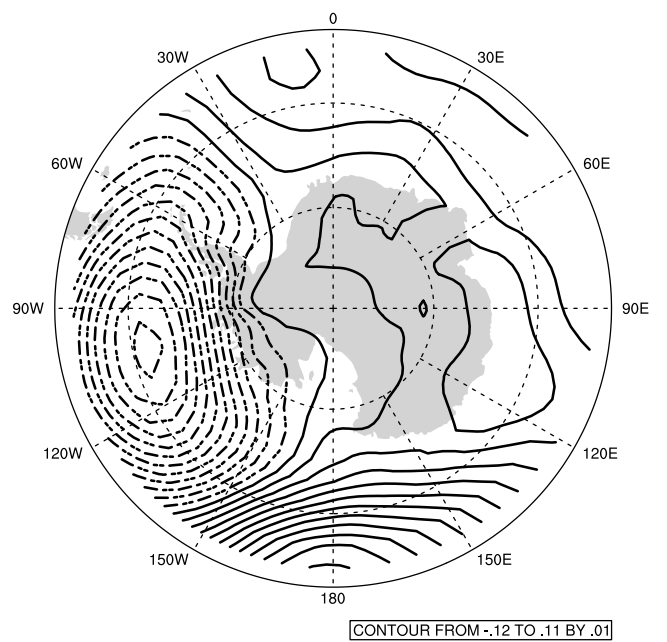



## EOFs of SLP - MPI-ESM-LR\_r2i1p1

SAM - Advance

46.28%

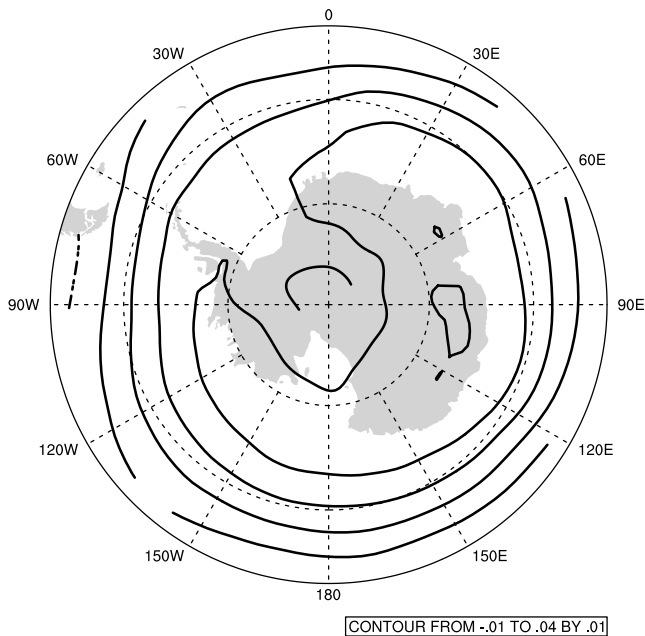

SAM - Retreat

53.17%

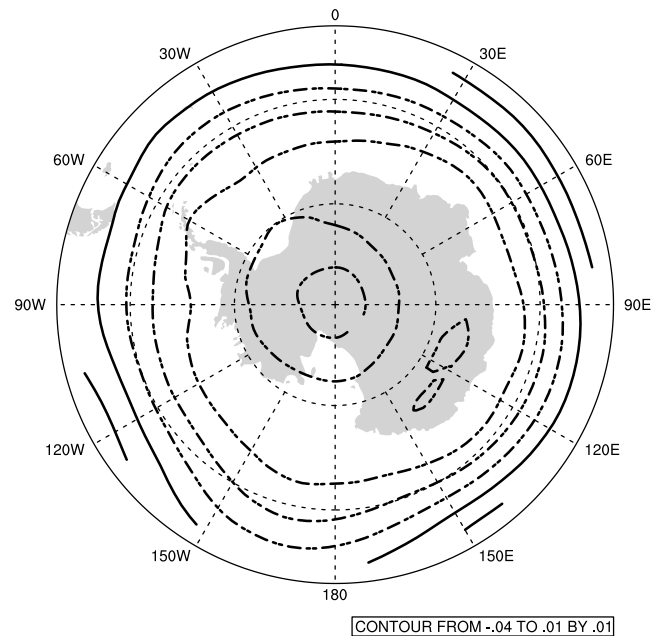

PSA - Advance

21.51%

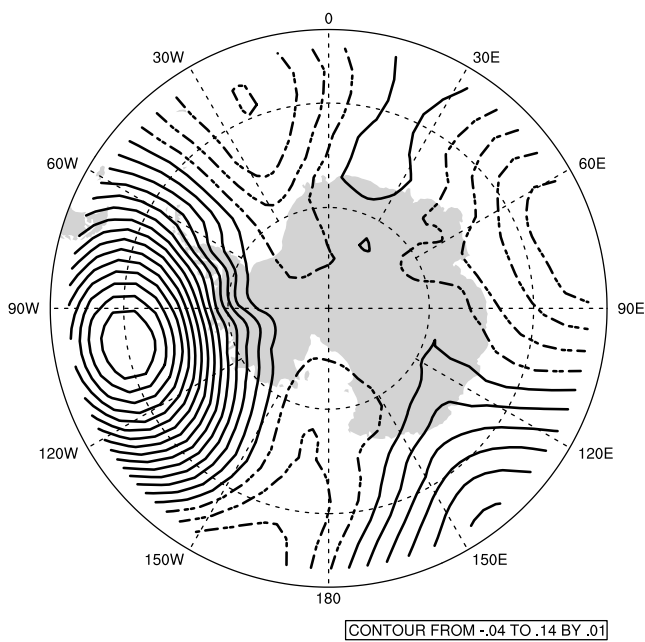

PSA - Retreat

16.5%

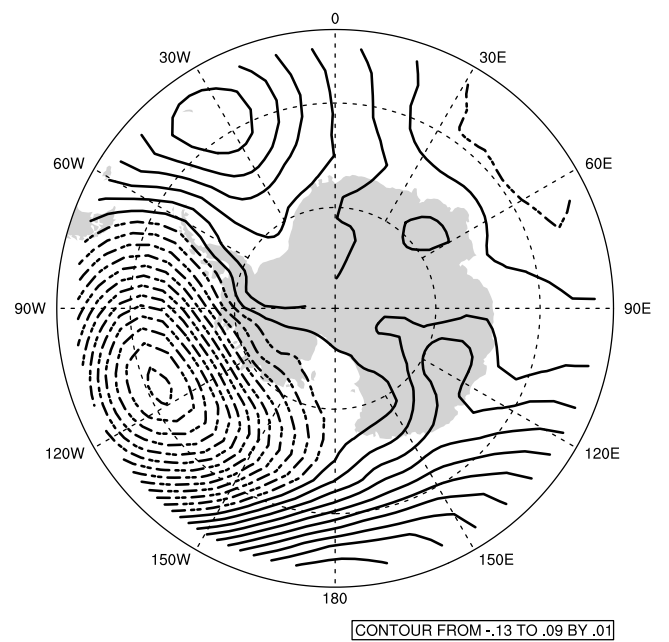

## EOFs of SLP - MPI-ESM-LR\_r3i1p1

SAM - Advance

43.96%

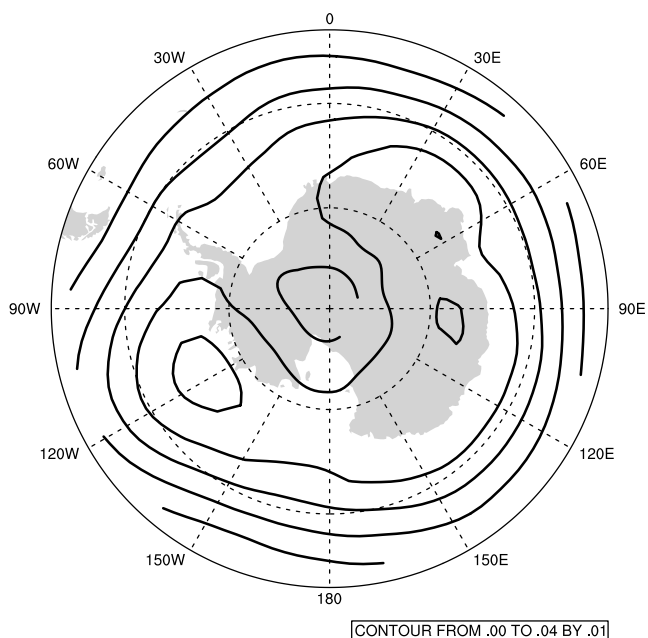

SAM - Retreat

47.09%

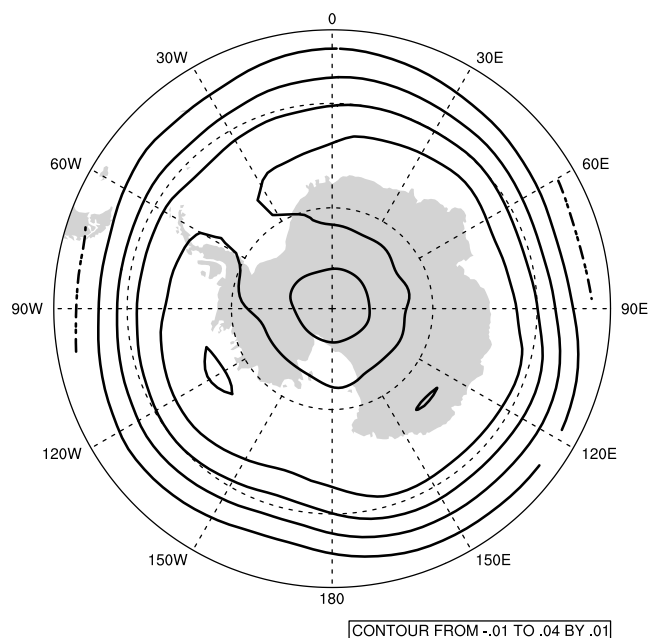

PSA - Advance

21.17%

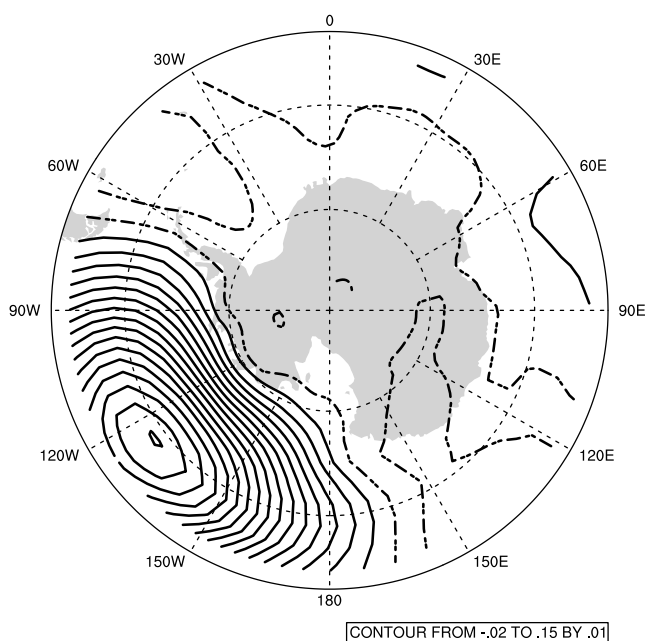

PSA - Retreat

18.07%

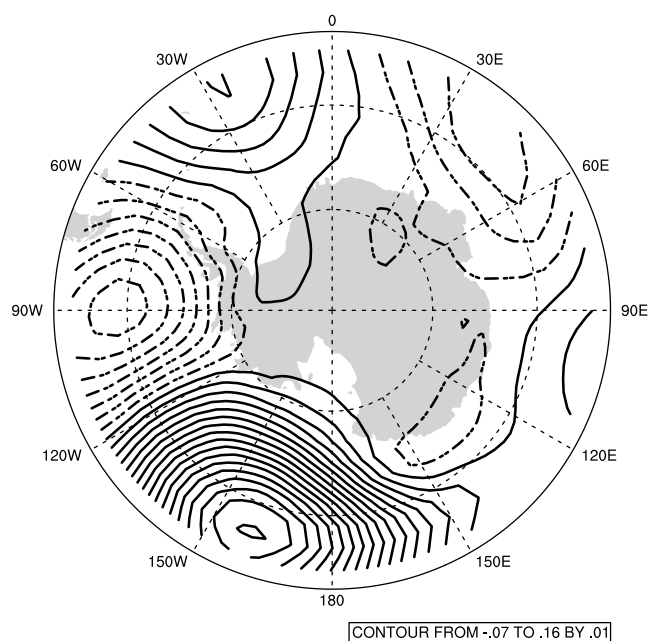

# EOFs of SLP - MPI-ESM-MR\_r1i1p1

SAM - Advance

39.42%

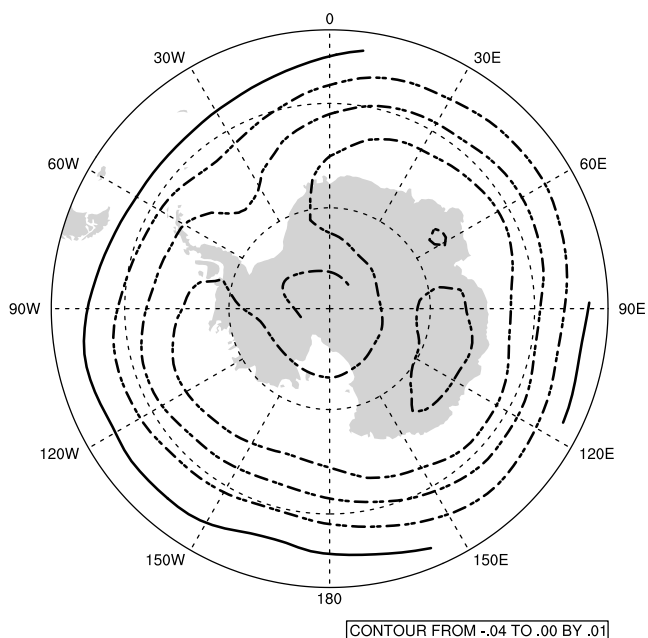

SAM - Retreat

52.93%

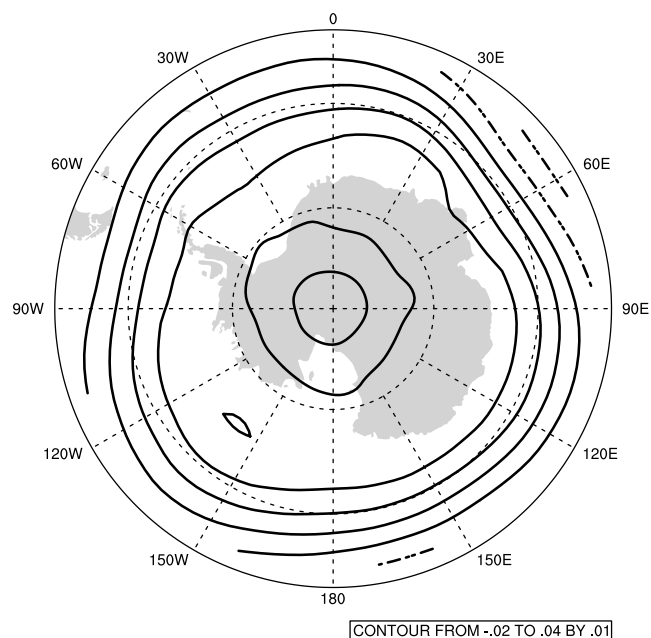

PSA - Advance

25.71%

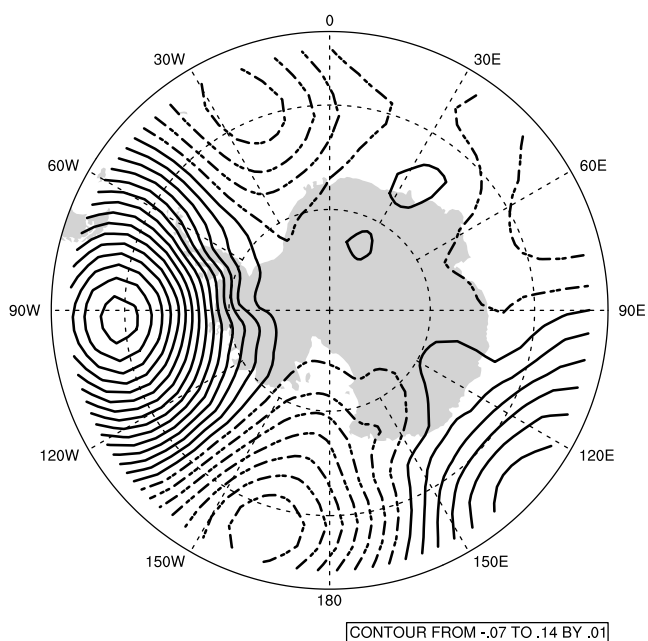

PSA - Retreat

16.38%

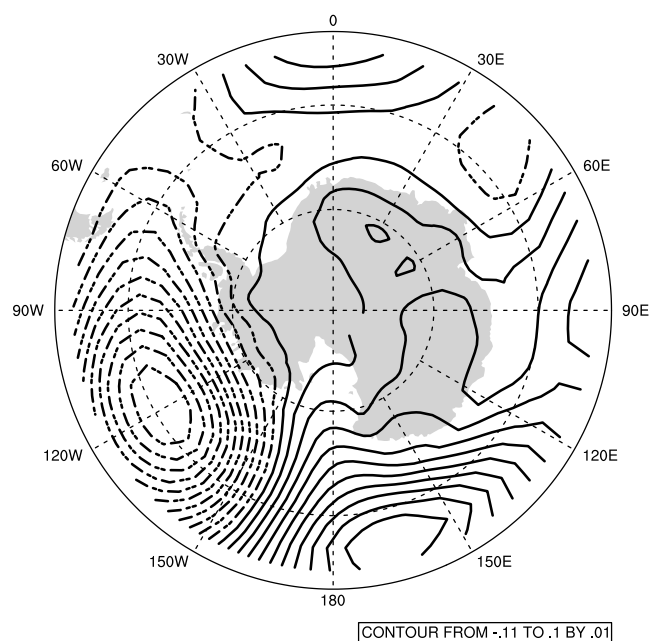

# EOFs of SLP - MPI-ESM-MR\_r2i1p1

SAM - Advance

42.57%

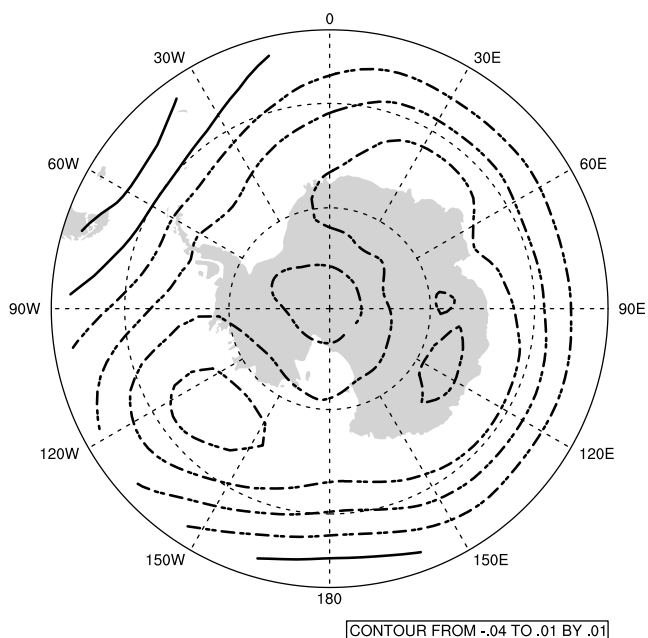

SAM - Retreat

57.18%

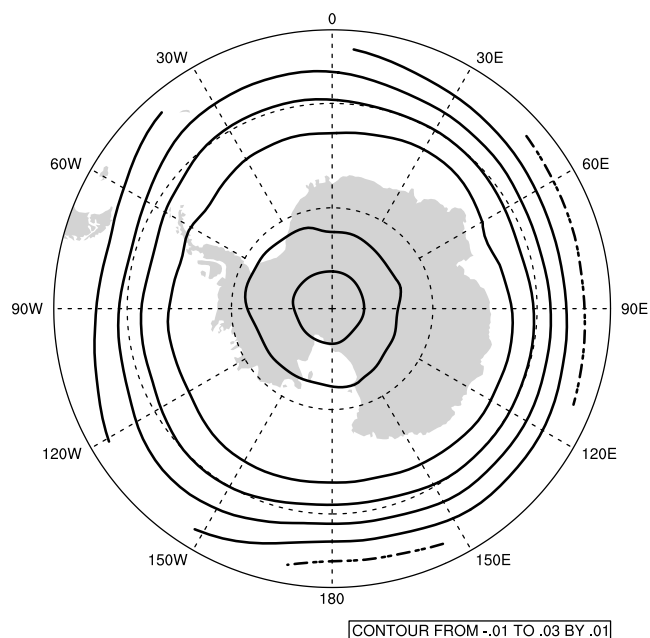

PSA - Advance

23.91%

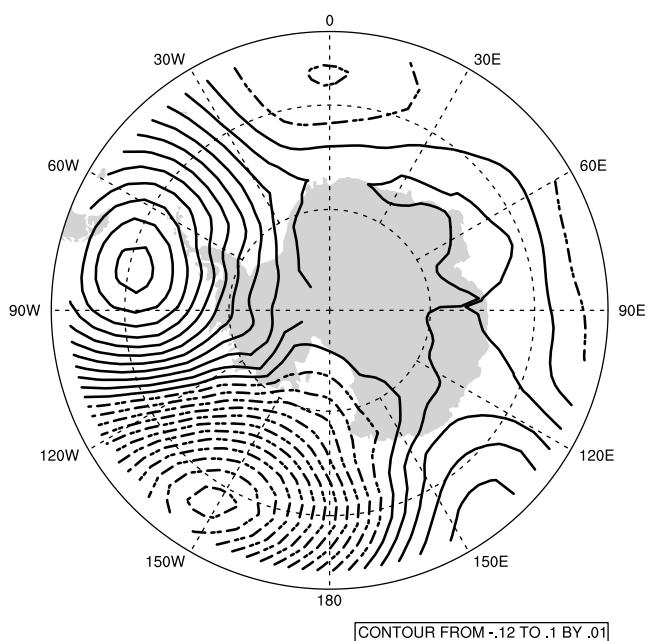

PSA - Retreat

15.09%

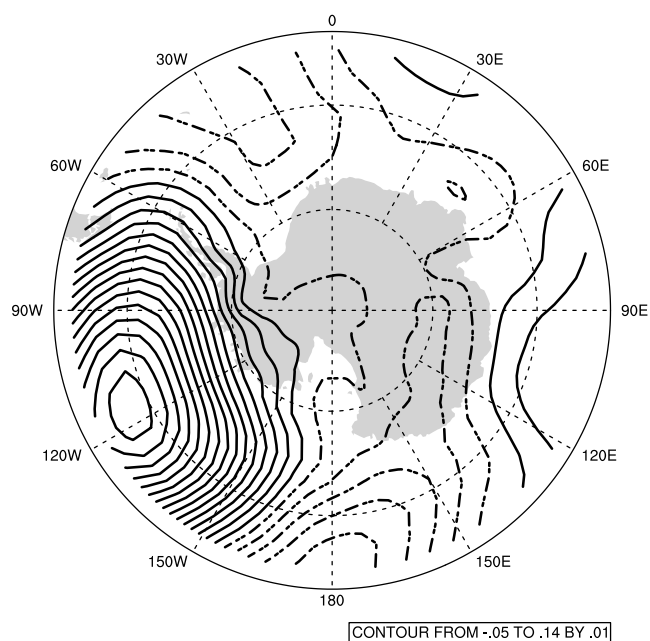

# EOFs of SLP - MPI-ESM-MR\_r3i1p1

SAM - Advance

39.47%

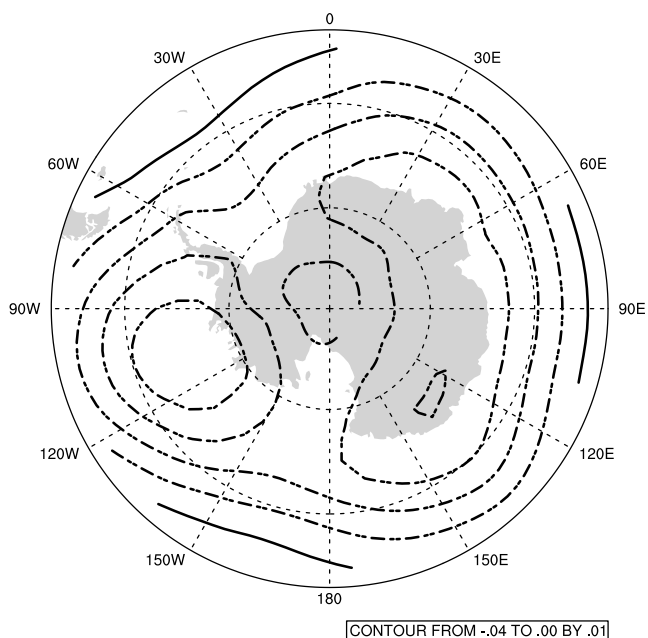

SAM - Retreat

54.04%

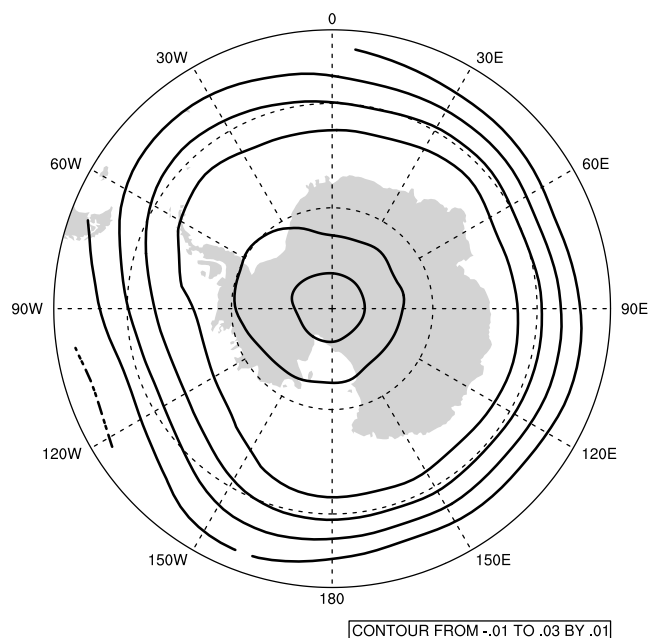

PSA - Advance

22.08%

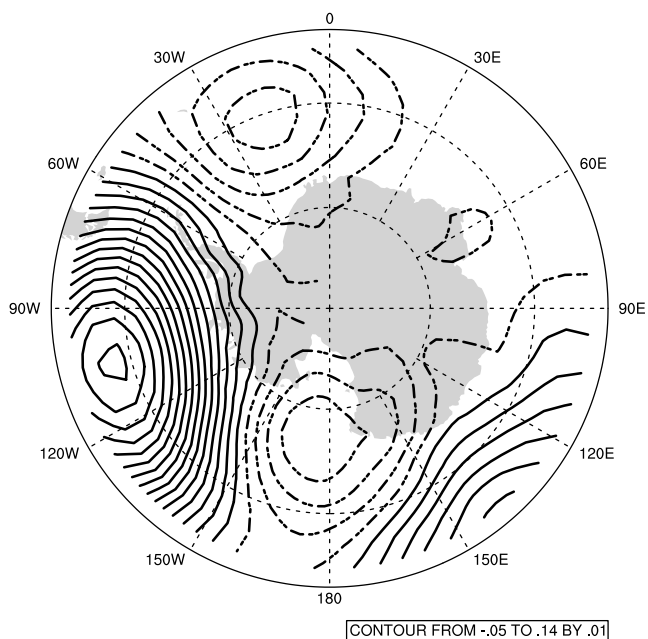

PSA - Retreat

14.79%

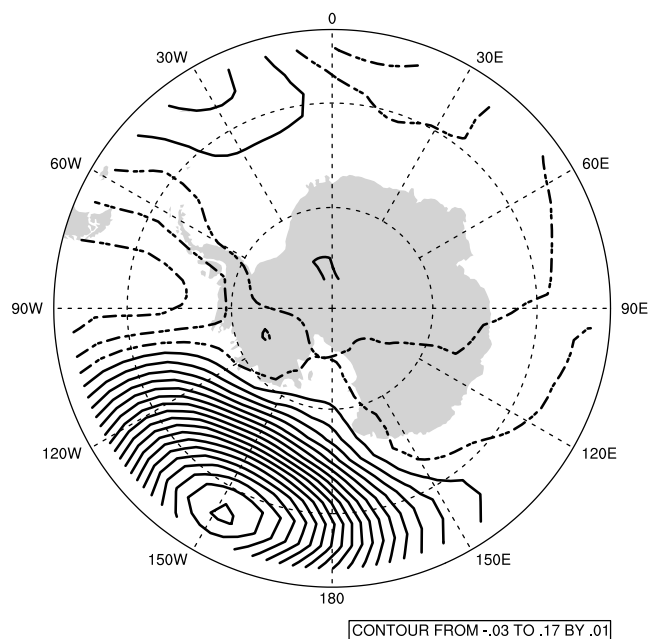

# EOFs of SLP - MRI-CGCM3\_r1i1p1

SAM - Advance

38.57%

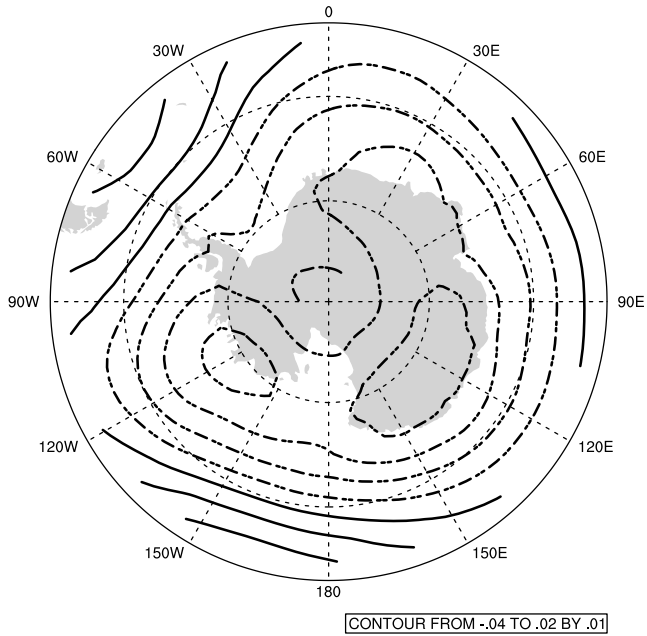

SAM - Retreat

53.85%

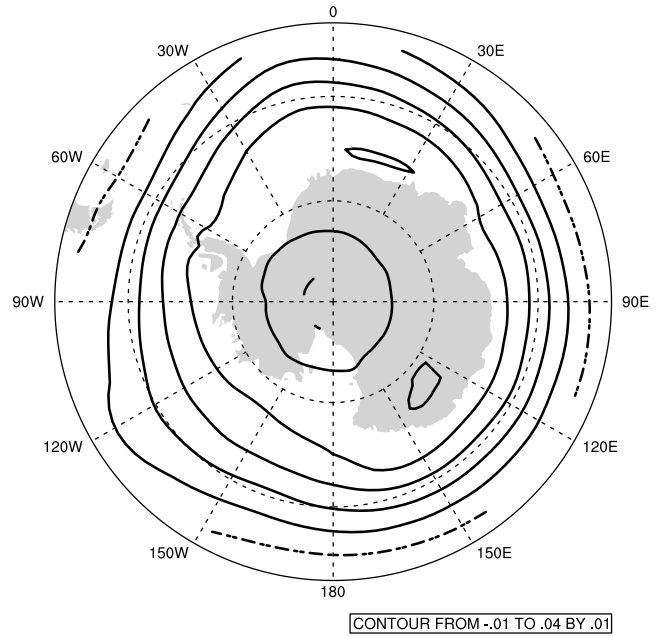

PSA - Advance

26.5%

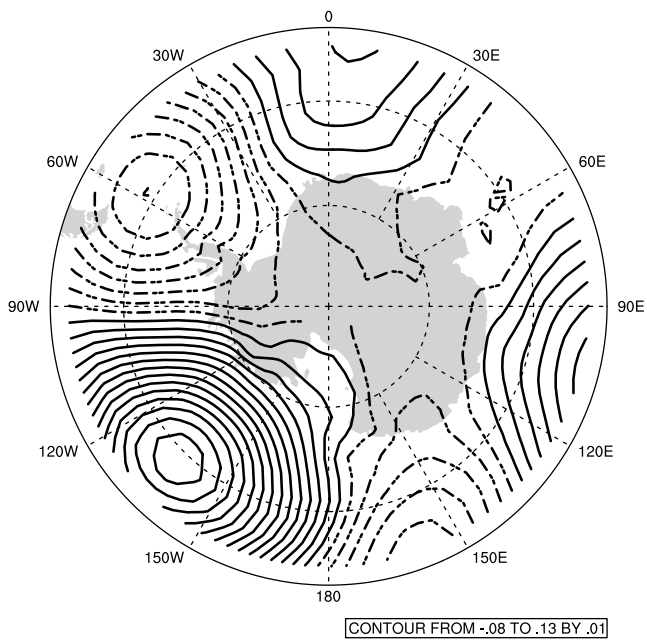

PSA - Retreat

17.14%

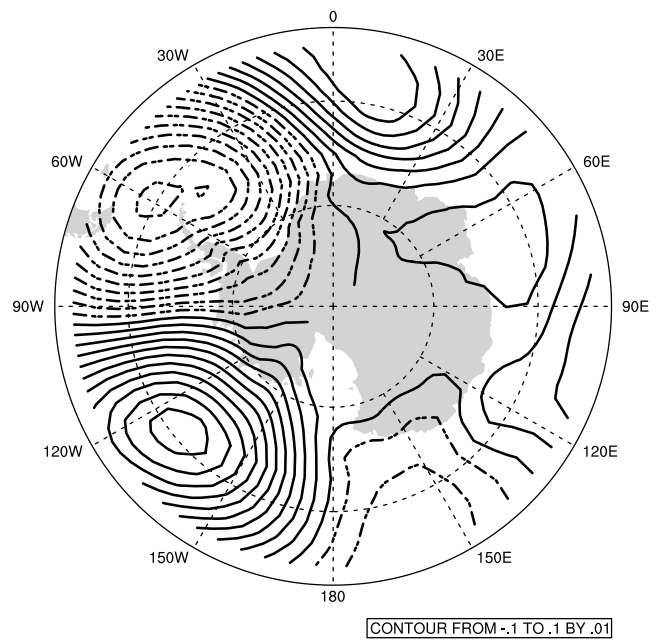

# EOFs of SLP - MRI-CGCM3\_r2i1p1

SAM - Advance

36.6%

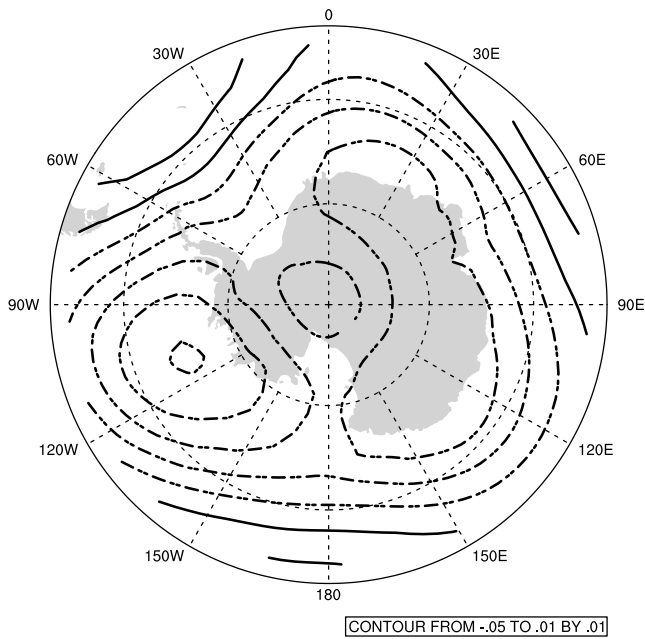

SAM - Retreat

54.07%

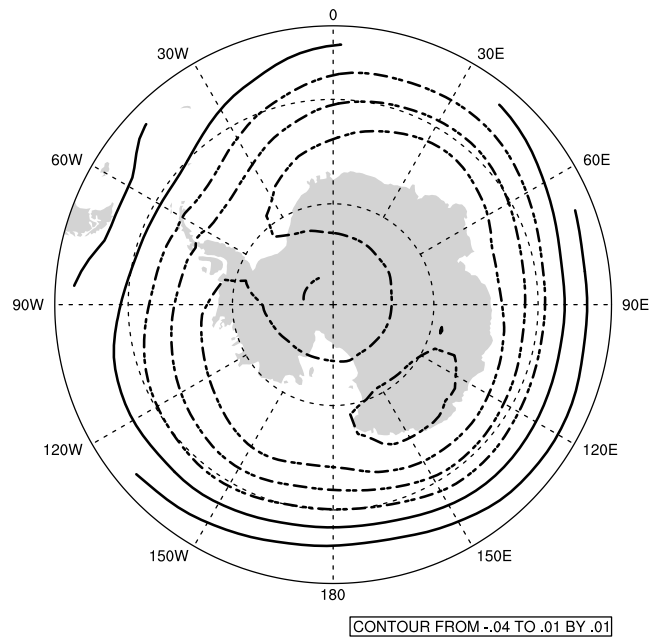

PSA - Advance

27.12%

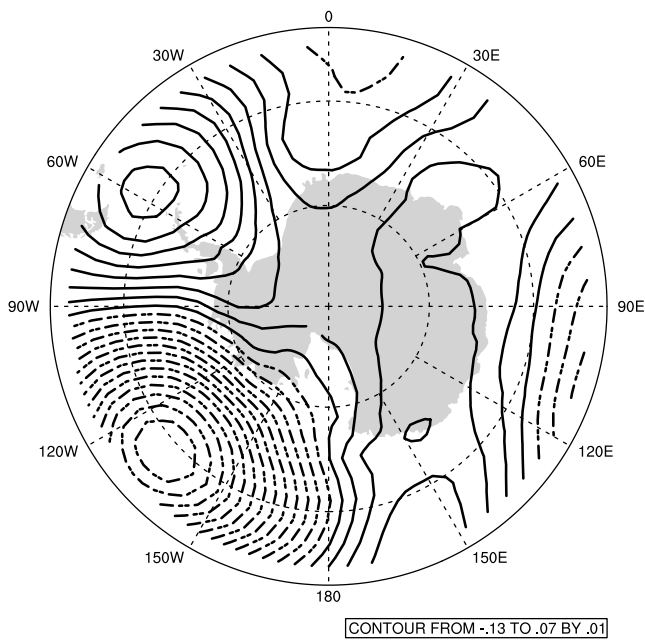

PSA - Retreat

17.36%

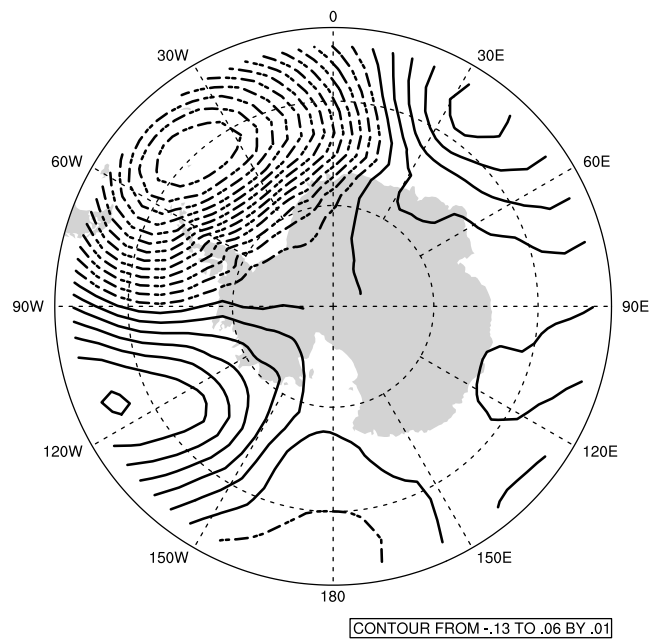

# EOFs of SLP - MRI-CGCM3\_r3i1p1

SAM - Advance

30.53%

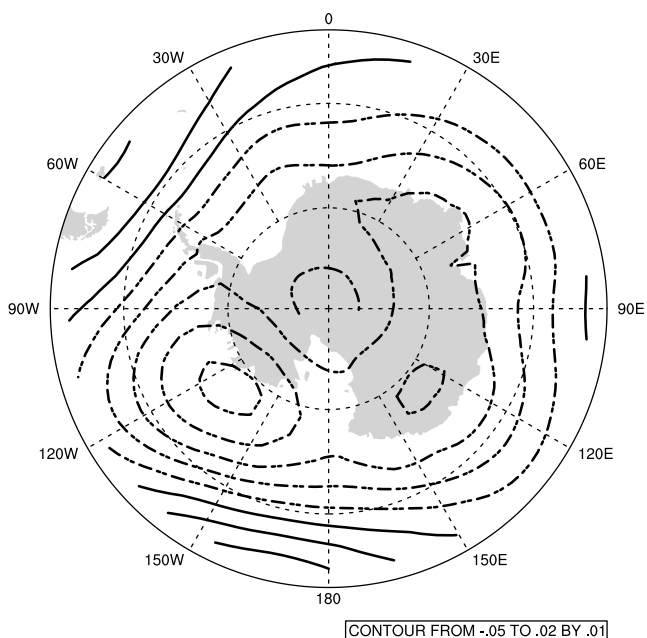

SAM - Retreat

49.37%

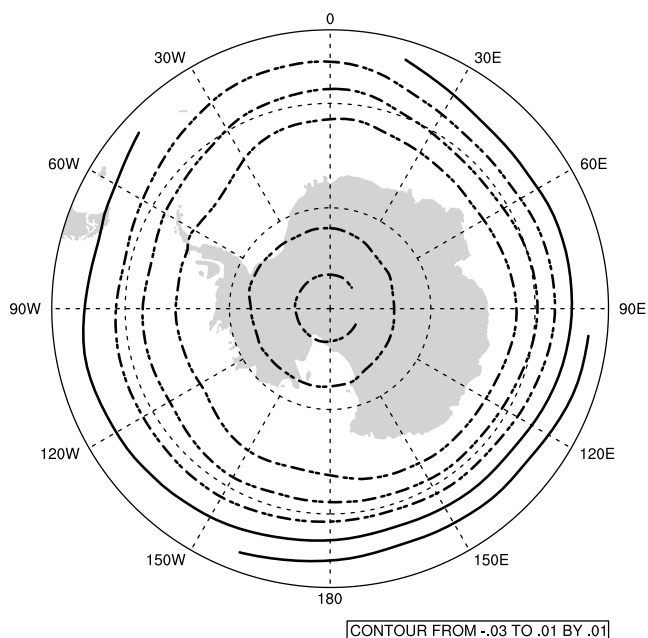

PSA - Advance

28.87%

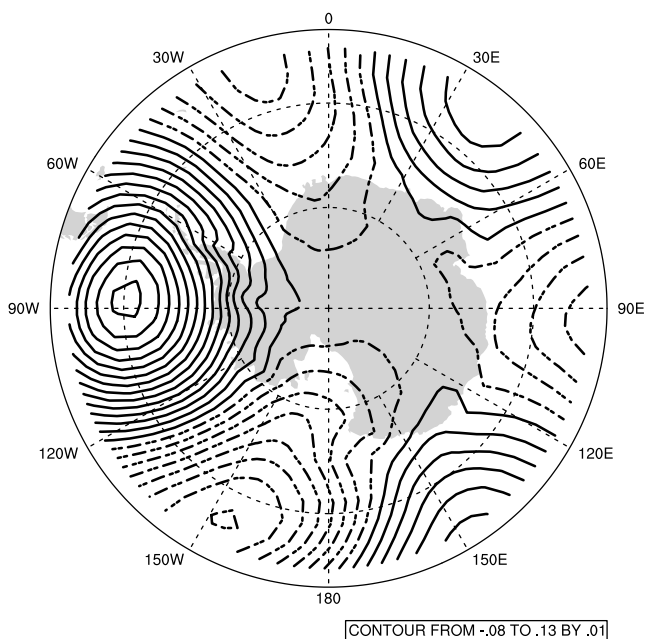

PSA - Retreat

18.24%

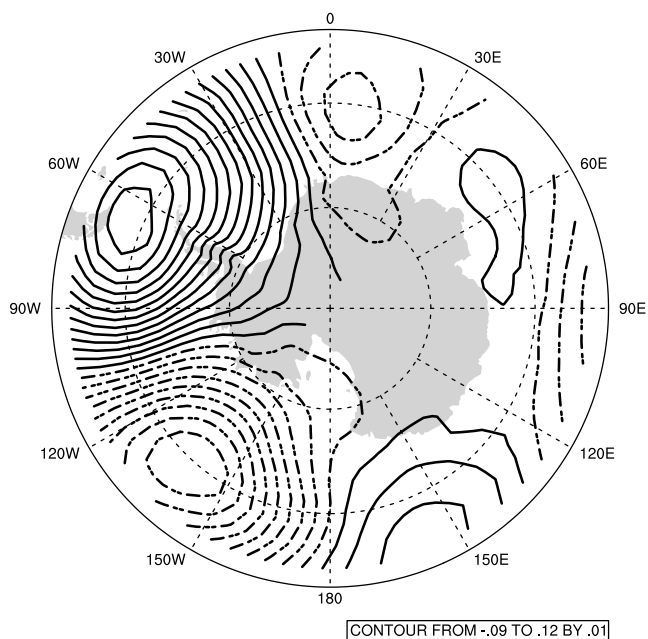



## EOFs of SLP - MRI-CGCM3\_r4i1p2

SAM - Advance

37.11%

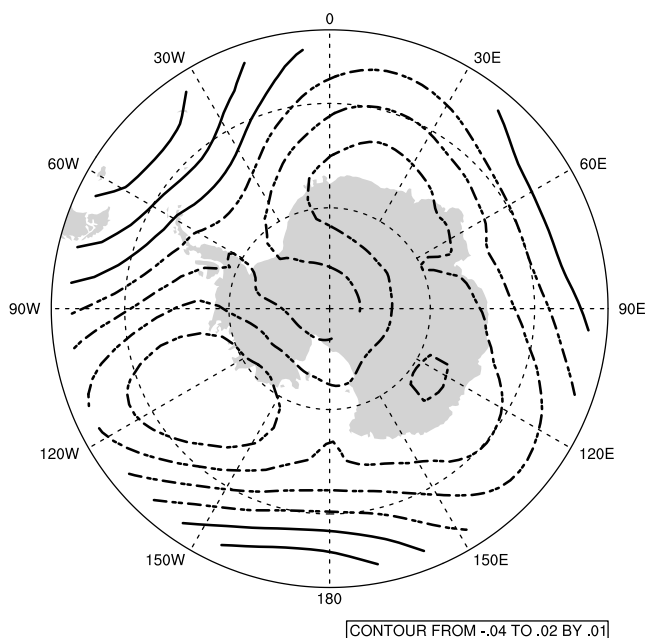

SAM - Retreat

51.27%

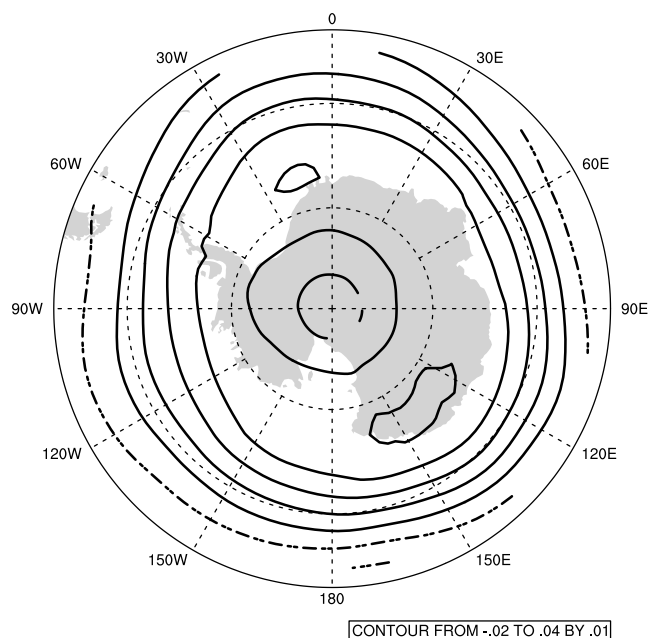

PSA - Advance

27.74%

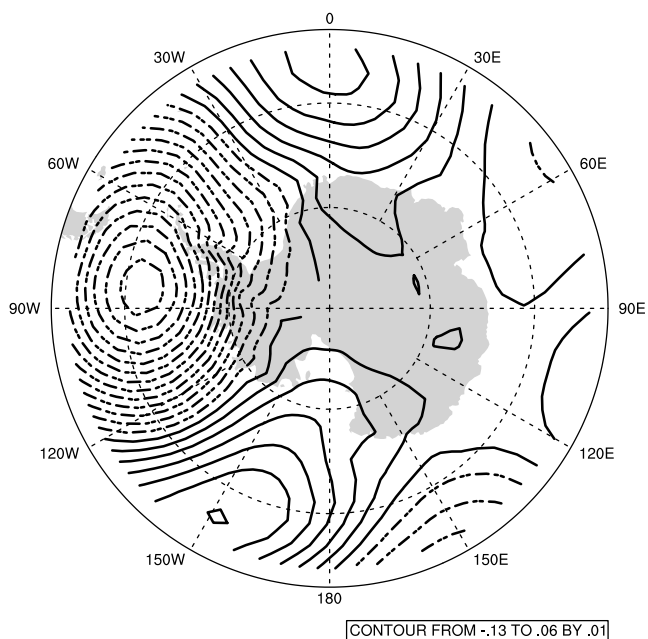

PSA - Retreat

18.76%

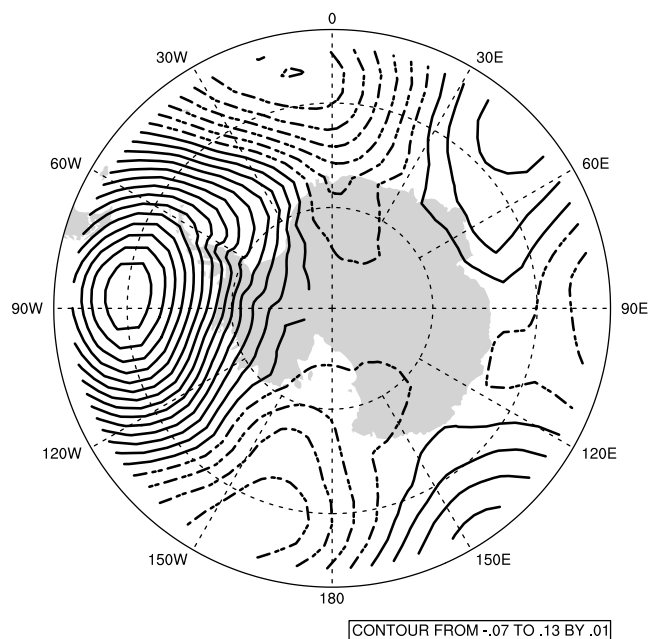

## EOFs of SLP - MRI-CGCM3\_r5i1p2

SAM - Advance

40.68%

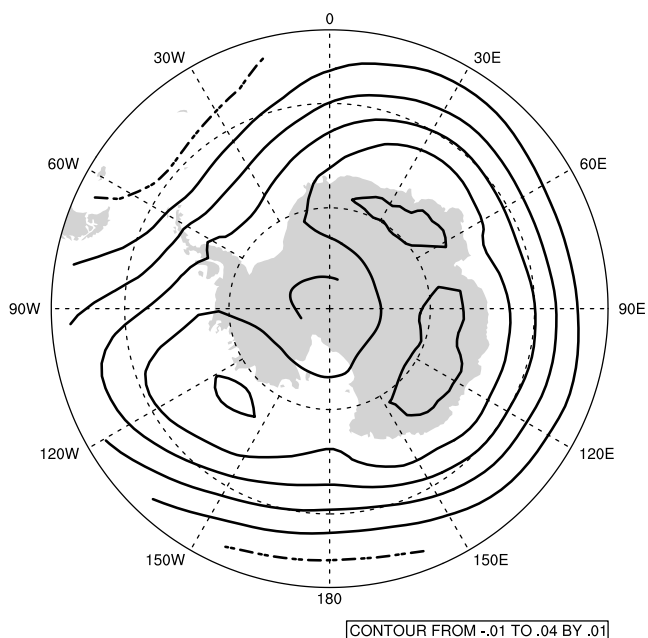

SAM - Retreat

55.53%

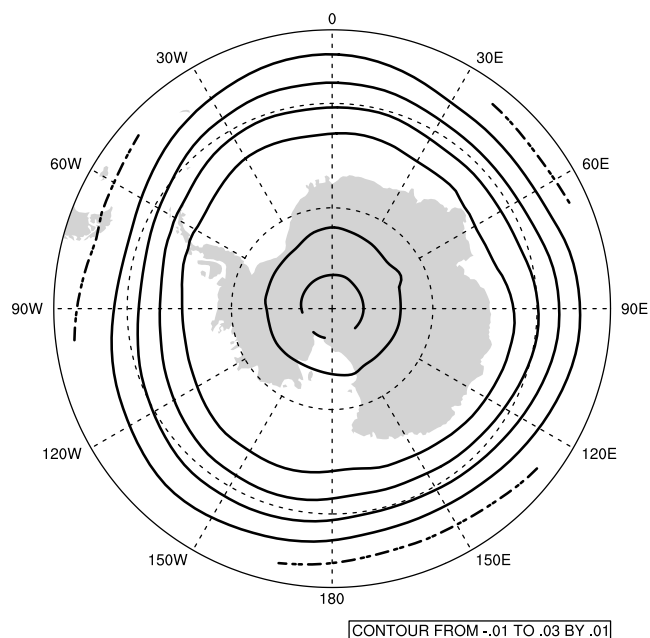

PSA - Advance

26.07%

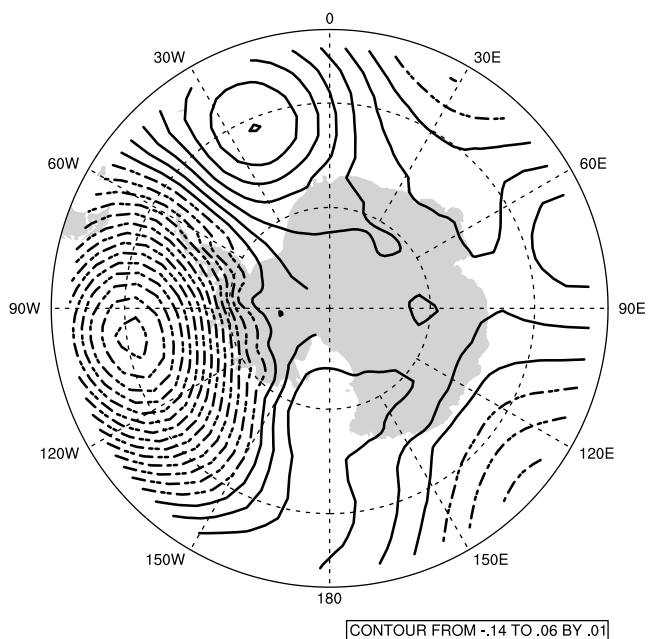

PSA - Retreat

17.73%

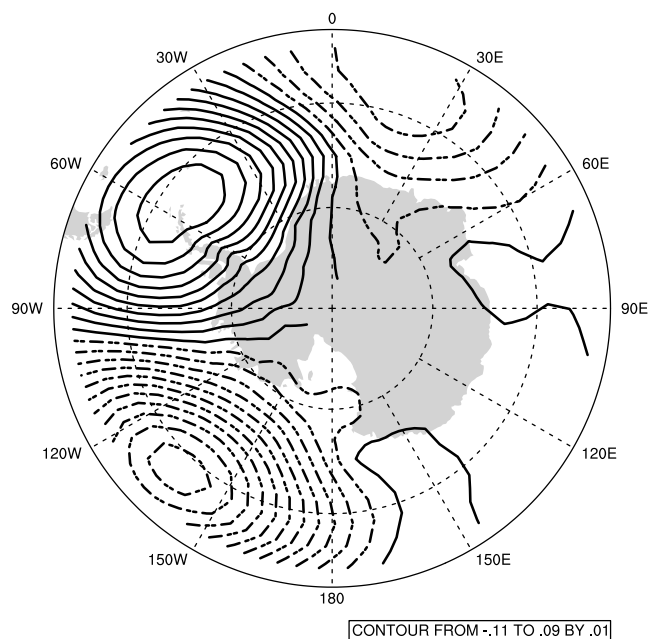

# EOFs of SLP - NorESM1-M\_r1i1p1

SAM - Advance

31.64%

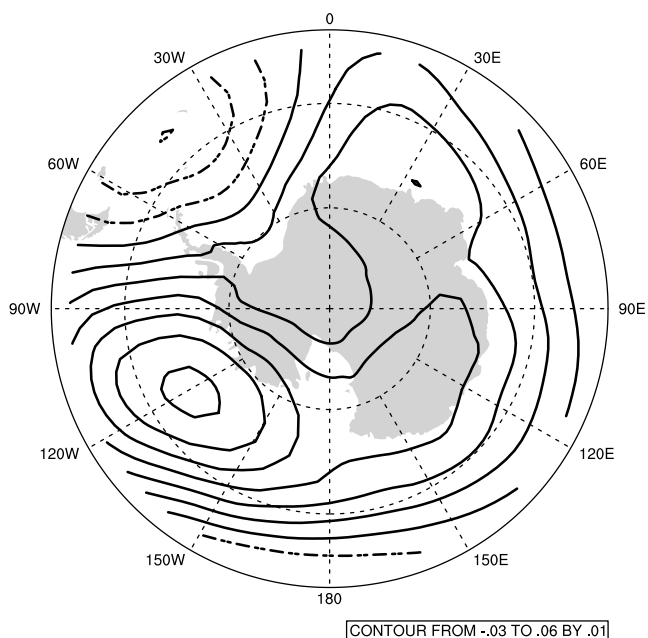

SAM - Retreat

40.85%

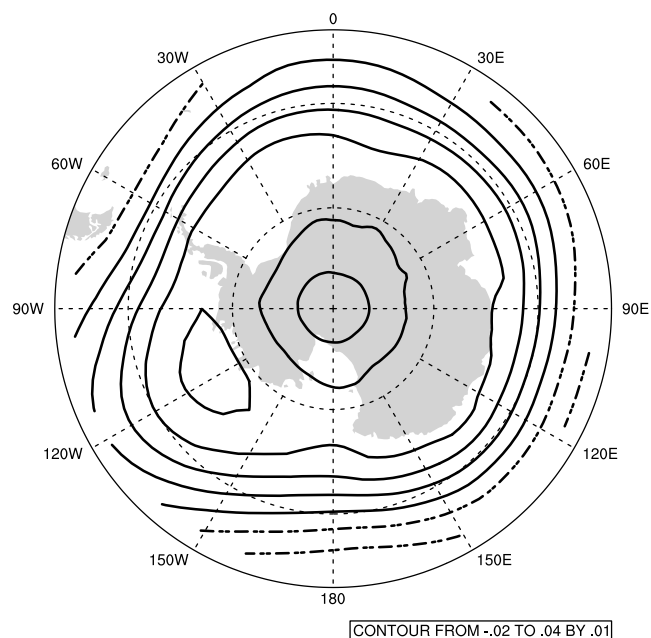

PSA - Advance

31.28%

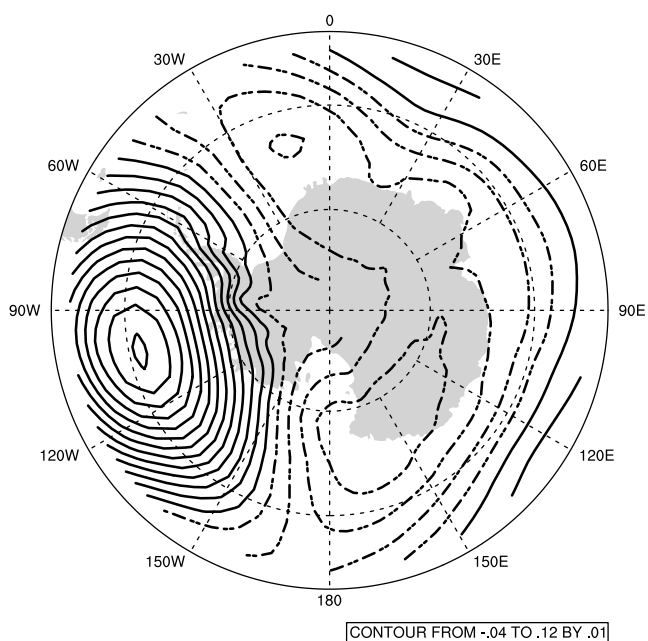

PSA - Retreat

25.21%

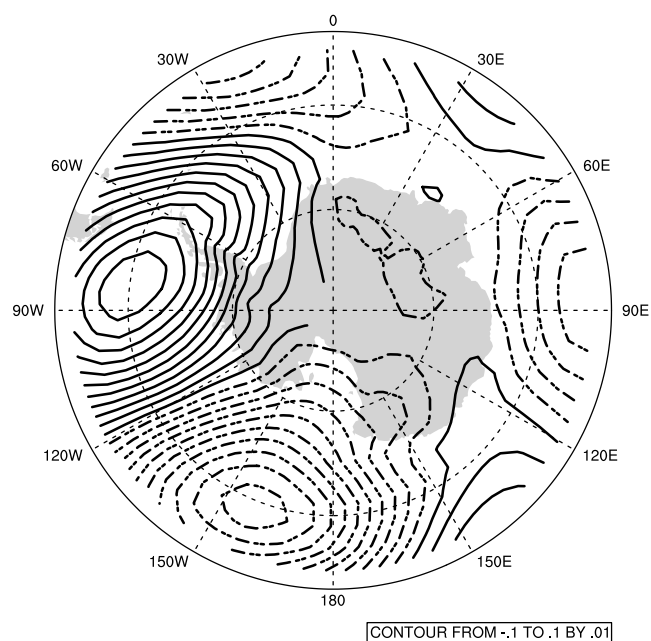

# EOFs of SLP - NorESM1-M\_r2i1p1

SAM - Advance

27.76%

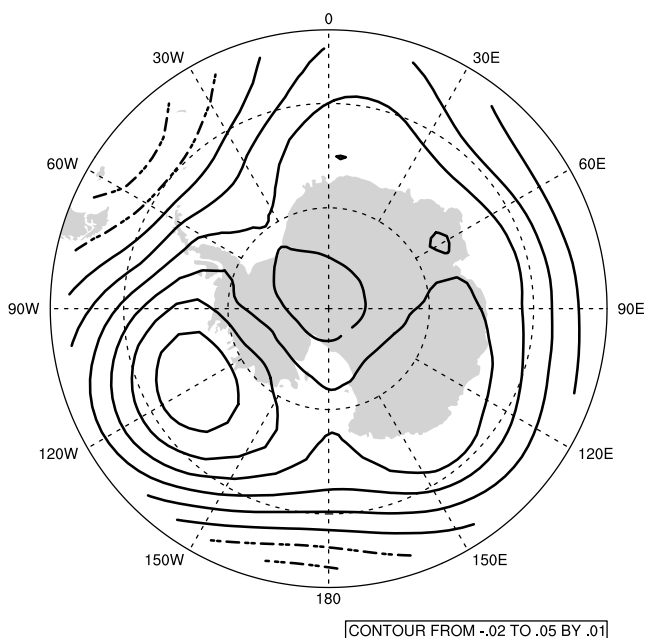

SAM - Retreat

43.71%

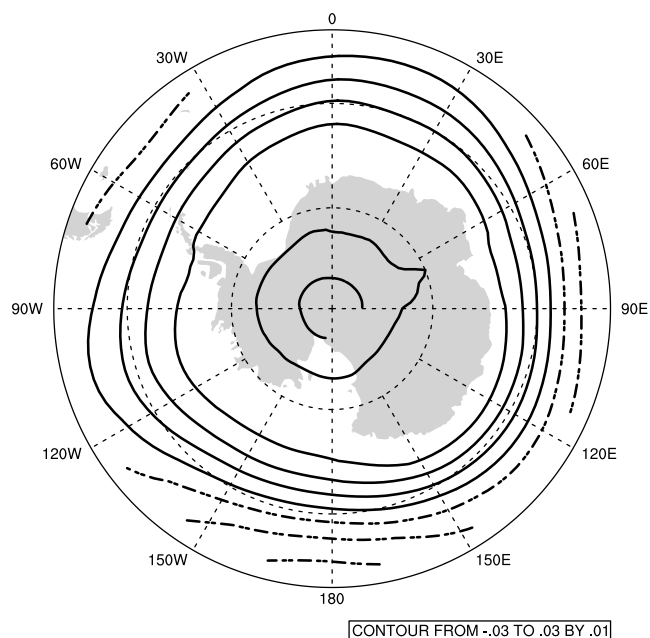

PSA - Advance

34.37%

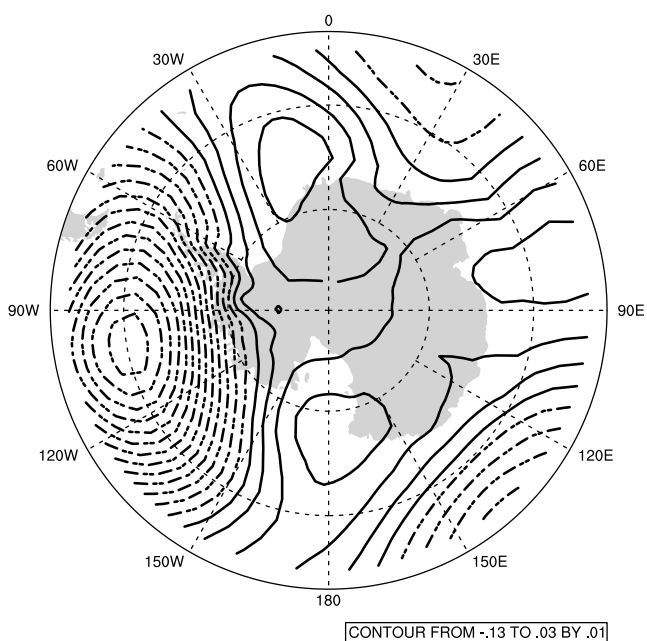

PSA - Retreat

25.48%

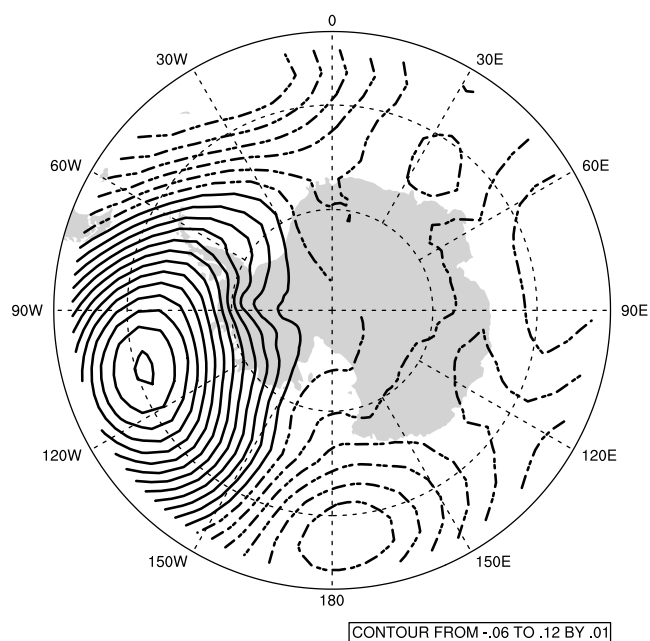

## EOFs of SLP - NorESM1-M\_r3i1p1

SAM - Advance

34.95%

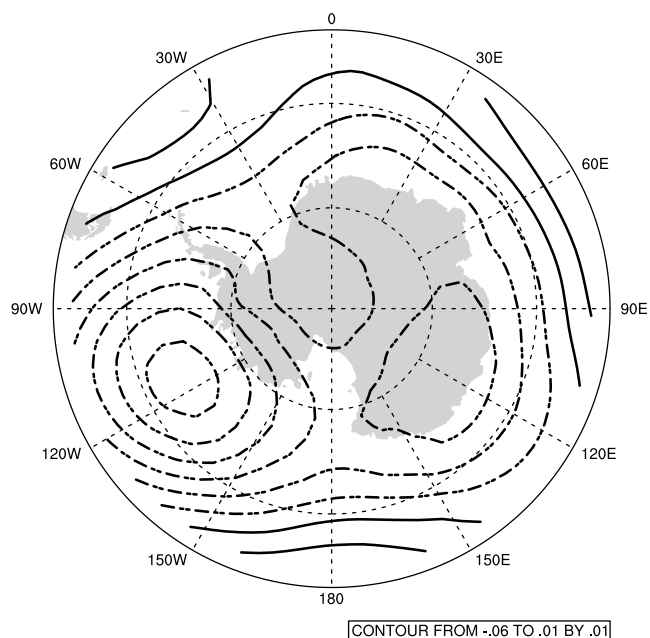

SAM - Retreat

54.37%

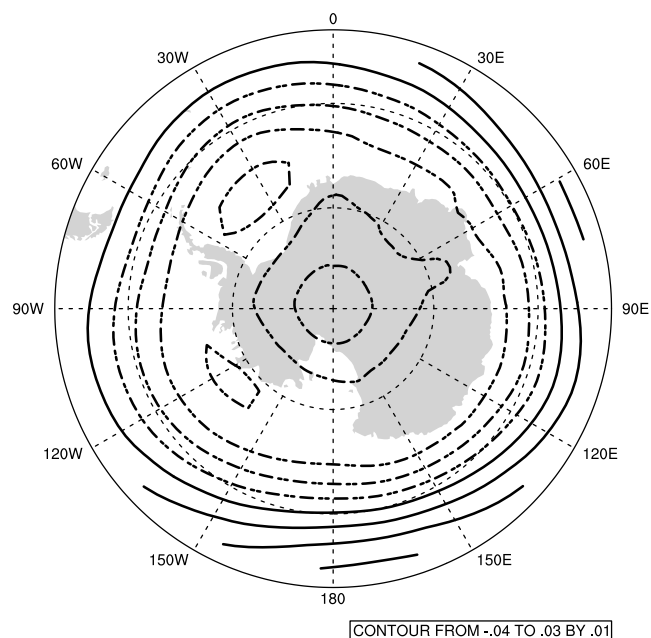

PSA - Advance

31.06%

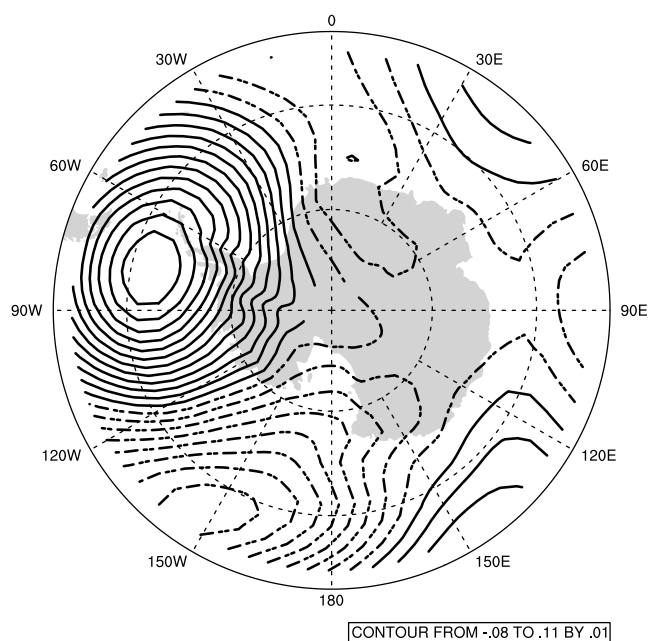

PSA - Retreat

18.87%

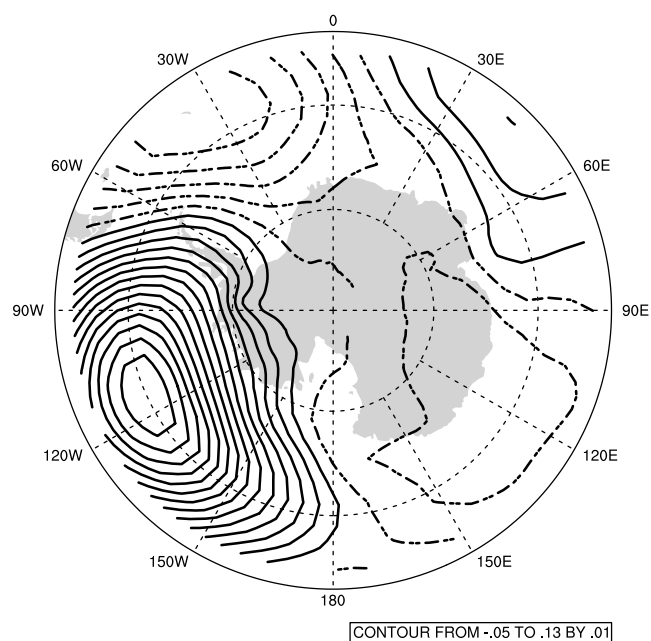

Supplement: Supplementary file 2 [file tc-11-789-2017-supplement.zip]
