# Supplementary material for: Interactions between Antarctic sea ice and large-scale atmospheric modes in CMIP5 models
Source: Copernicus journal article supplement (doi:10.5194/tc-11-789-2017), 2017-03-24

# ACCESS1-0

a) Ross/Amundsen Seas: Advance

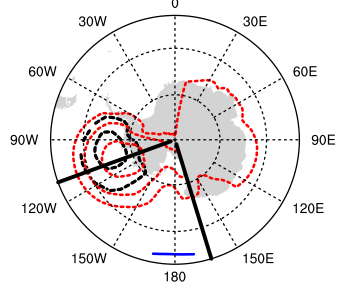

b) Ross/Amundsen Seas: Retreat

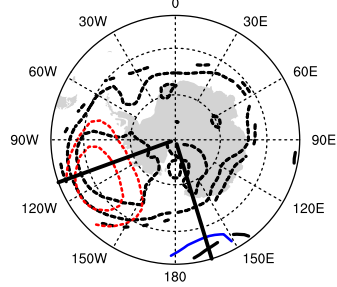

c) Amundsen/Bellingshausen Seas: Advance

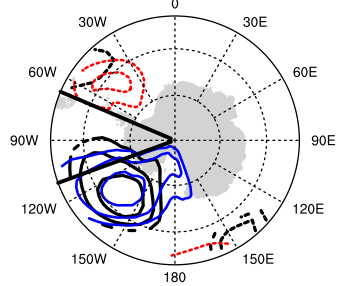

d) Amundsen/Bellingshausen Seas: Retreat

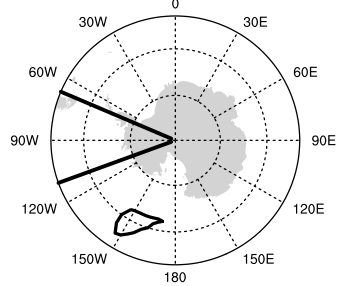

e) Weddell Sea: Advance

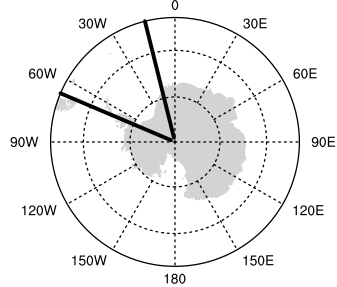

f) Weddell Sea: Retreat

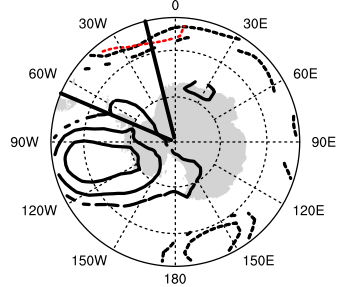

g) King Hakon VII: Advance

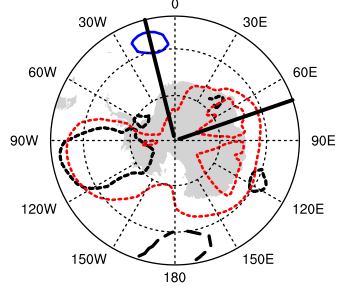

h) King Hakon VII: Retreat

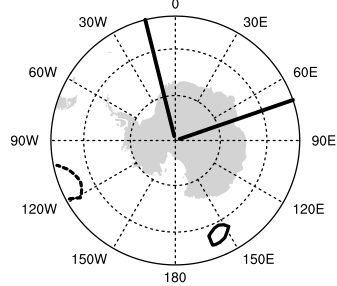

i) East Antarctica: Advance

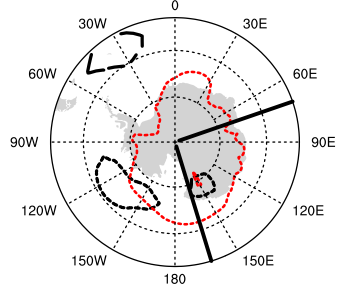

j) East Antarctica: Retreat

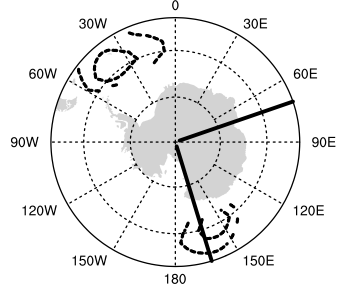

# ACCESS1-3

a) Ross/Amundsen Seas: Advance

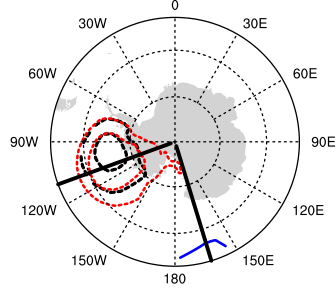

b) Ross/Amundsen Seas: Retreat

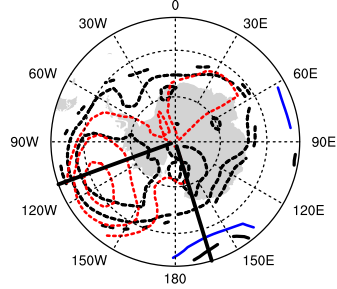

c) Amundsen/Bellingshausen Seas: Advance

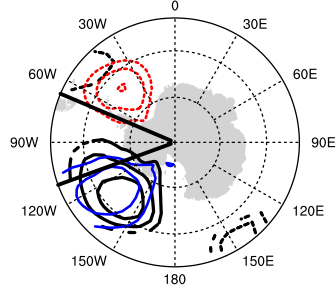

d) Amundsen/Bellingshausen Seas: Retreat

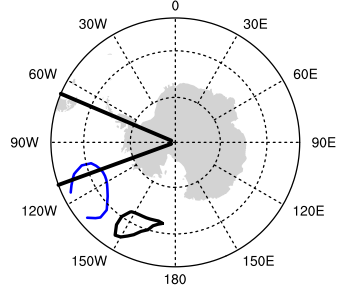

e) Weddell Sea: Advance

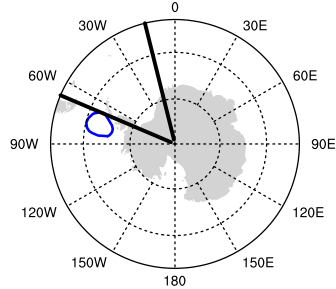

f) Weddell Sea: Retreat

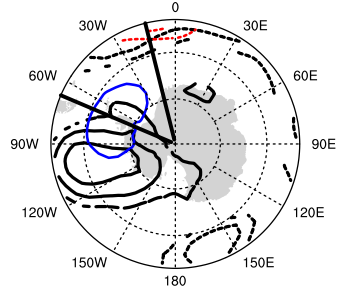

g) King Hakon VII: Advance

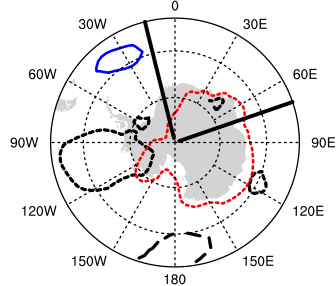

h) King Hakon VII: Retreat

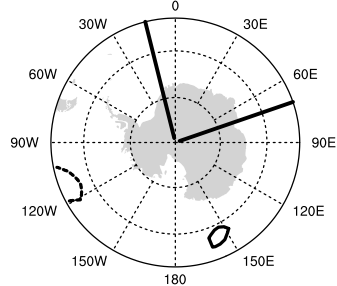

i) East Antarctica: Advance

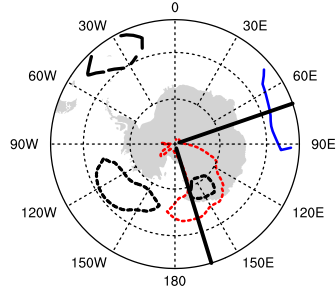

j) East Antarctica: Retreat

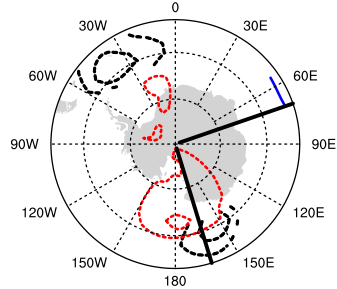

# BCC-CSM1-1

a) Ross/Amundsen Seas: Advance

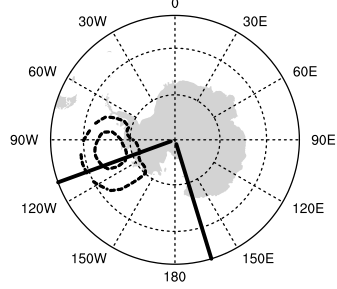

b) Ross/Amundsen Seas: Retreat

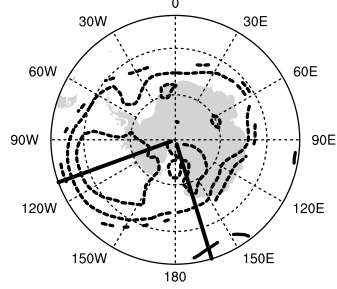

c) Amundsen/Bellingshausen Seas: Advance

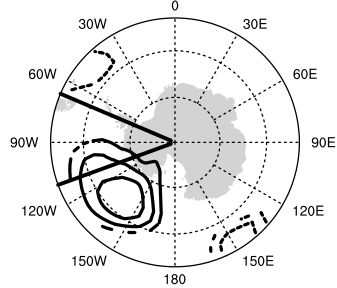

d) Amundsen/Bellingshausen Seas: Retreat

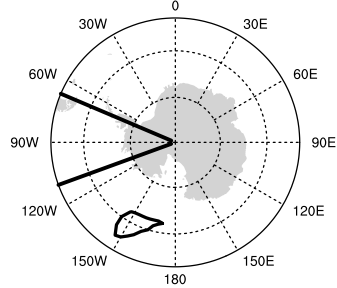

e) Weddell Sea: Advance

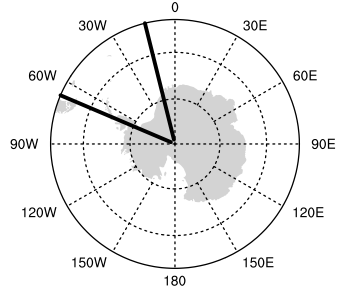

f) Weddell Sea: Retreat

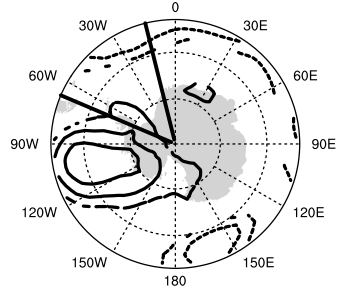

g) King Hakon VII: Advance

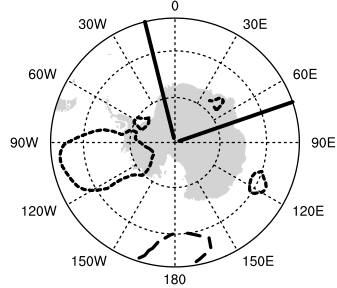

h) King Hakon VII: Retreat

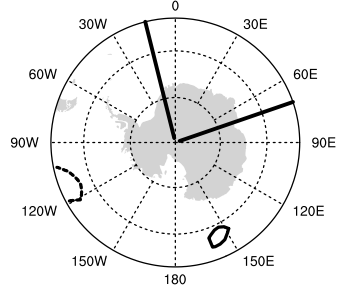

i) East Antarctica: Advance

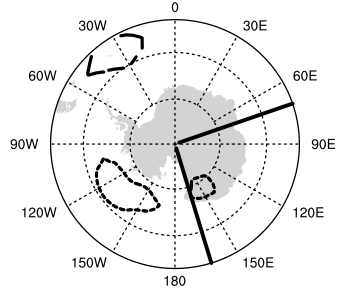

j) East Antarctica: Retreat

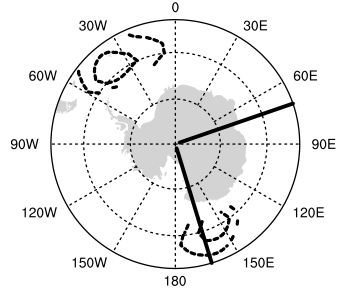

# CCSM4

a) Ross/Amundsen Seas: Advance

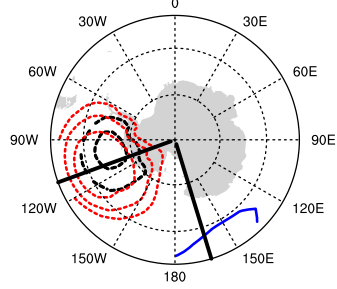

b) Ross/Amundsen Seas: Retreat

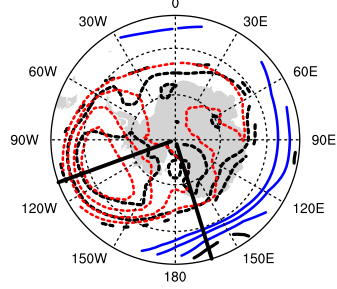

c) Amundsen/Bellingshausen Seas: Advance

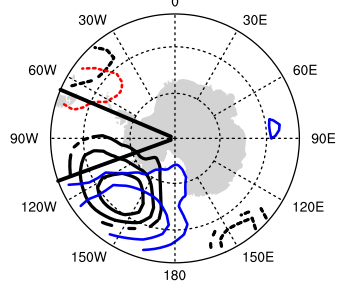

d) Amundsen/Bellingshausen Seas: Retreat

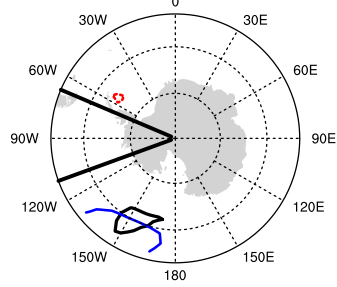

e) Weddell Sea: Advance

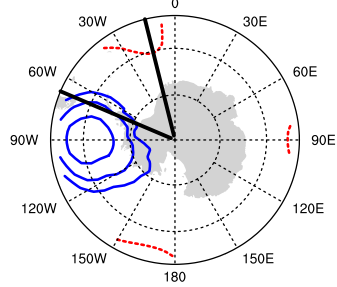

f) Weddell Sea: Retreat

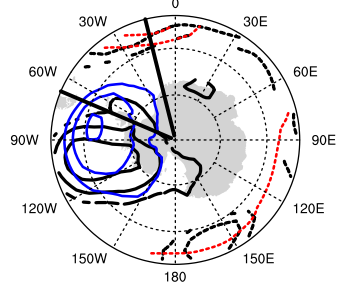

g) King Hakon VII: Advance

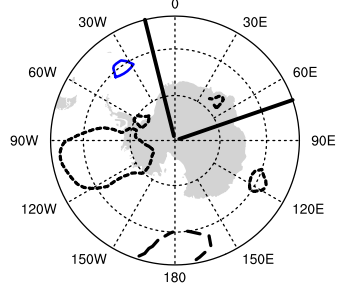

h) King Hakon VII: Retreat



i) East Antarctica: Advance

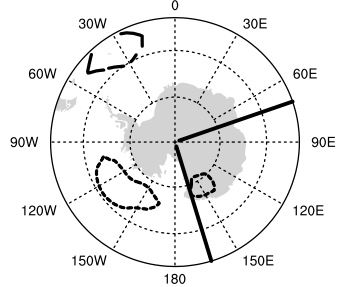

j) East Antarctica: Retreat

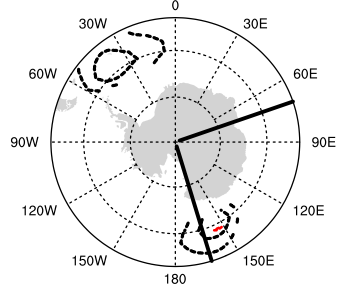

# CESM1-CAM5

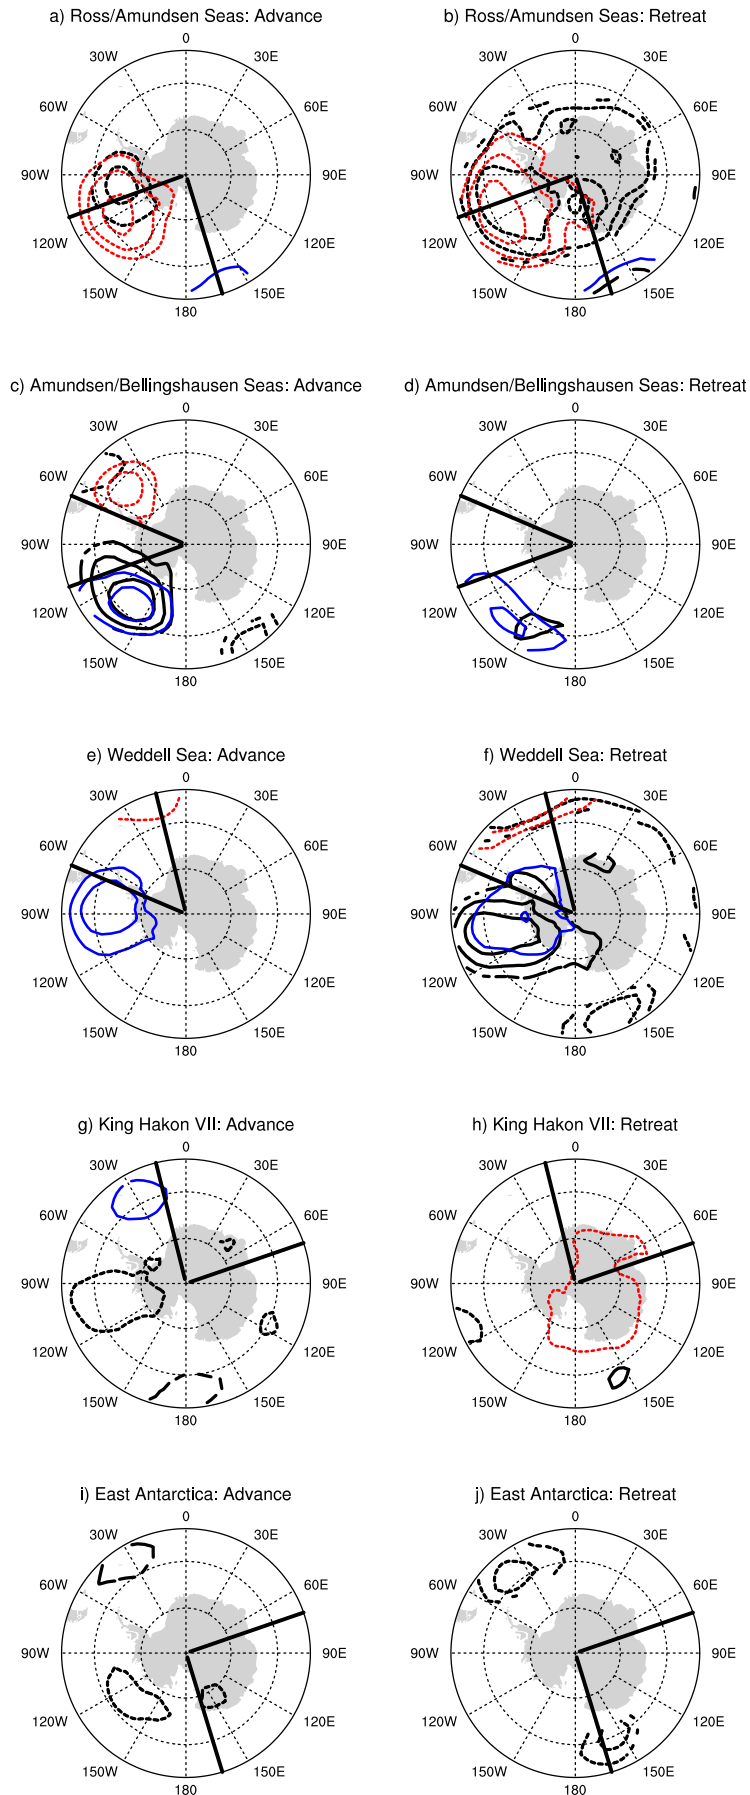

# CNRM-CM5

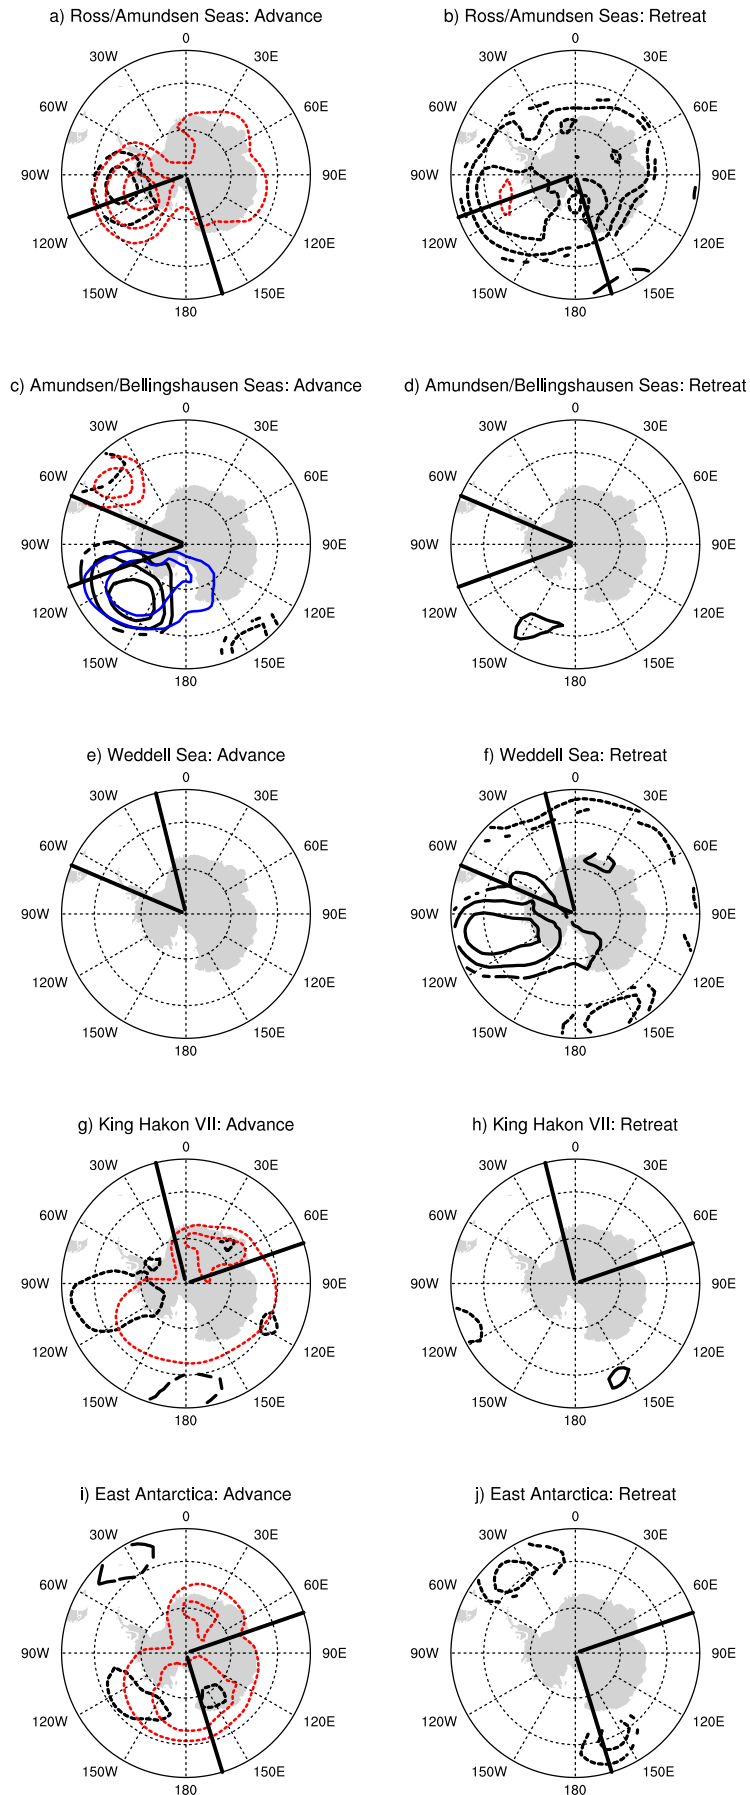

# CanESM2

a) Ross/Amundsen Seas: Advance

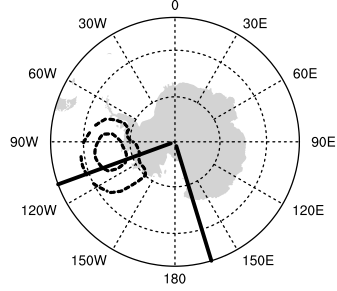

b) Ross/Amundsen Seas: Retreat

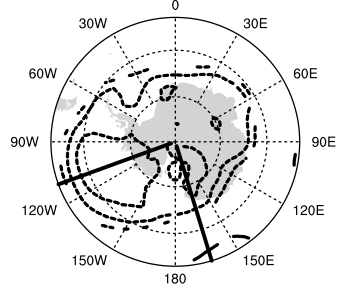

c) Amundsen/Bellingshausen Seas: Advance

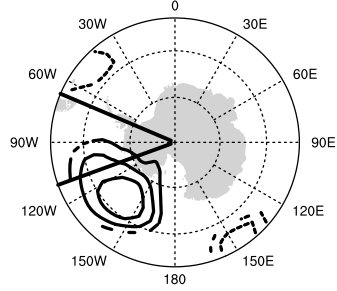

d) Amundsen/Bellingshausen Seas: Retreat

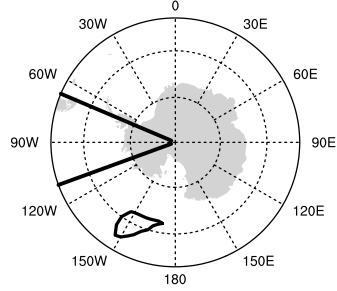

e) Weddell Sea: Advance



f) Weddell Sea: Retreat



g) King Hakon VII: Advance

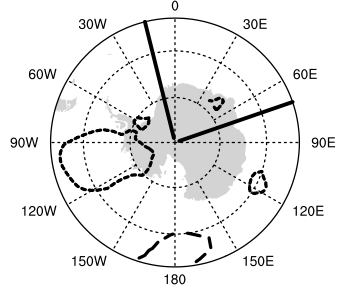

h) King Hakon VII: Retreat

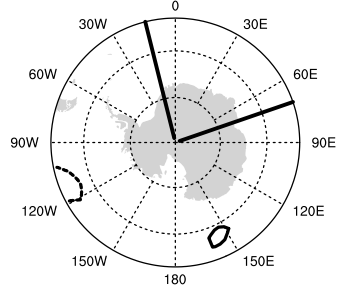

i) East Antarctica: Advance

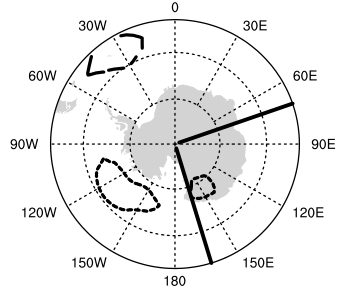

j) East Antarctica: Retreat

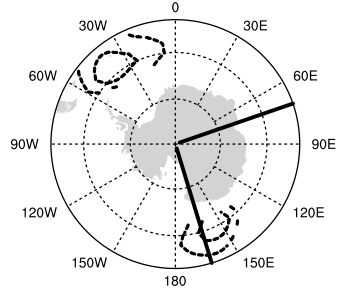

# FGOALS-g2

a) Ross/Amundsen Seas: Advance

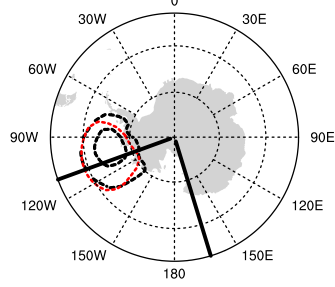

b) Ross/Amundsen Seas: Retreat

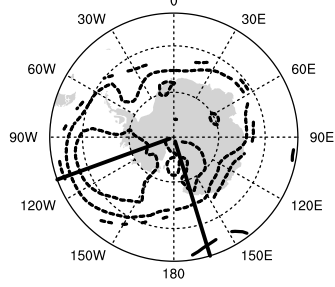

c) Amundsen/Bellingshausen Seas: Advance

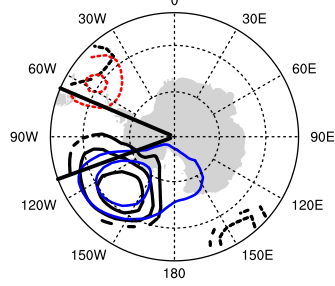

d) Amundsen/Bellingshausen Seas: Retreat

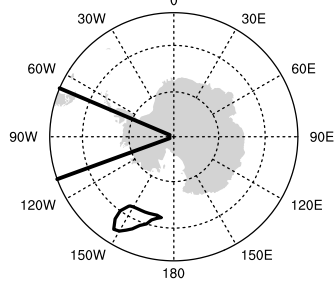

e) Weddell Sea: Advance

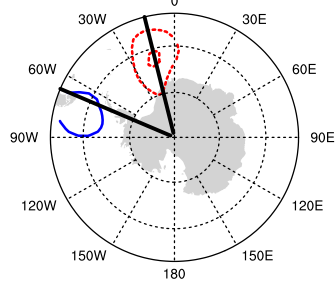

f) Weddell Sea: Retreat

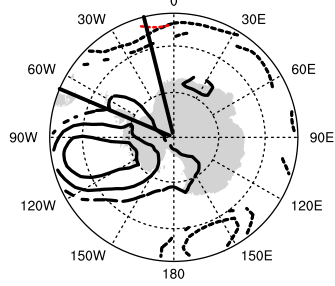

g) King Hakon VII: Advance

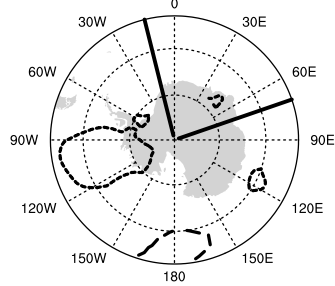

h) King Hakon VII: Retreat

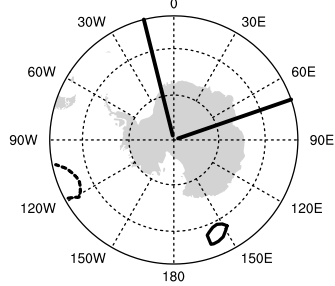

i) East Antarctica: Advance

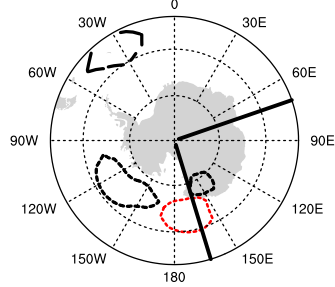

j) East Antarctica: Retreat

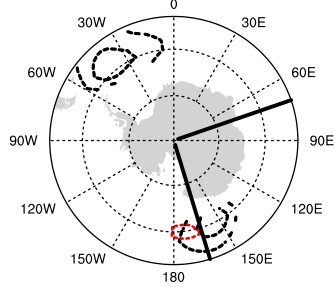



# GFDL-CM3

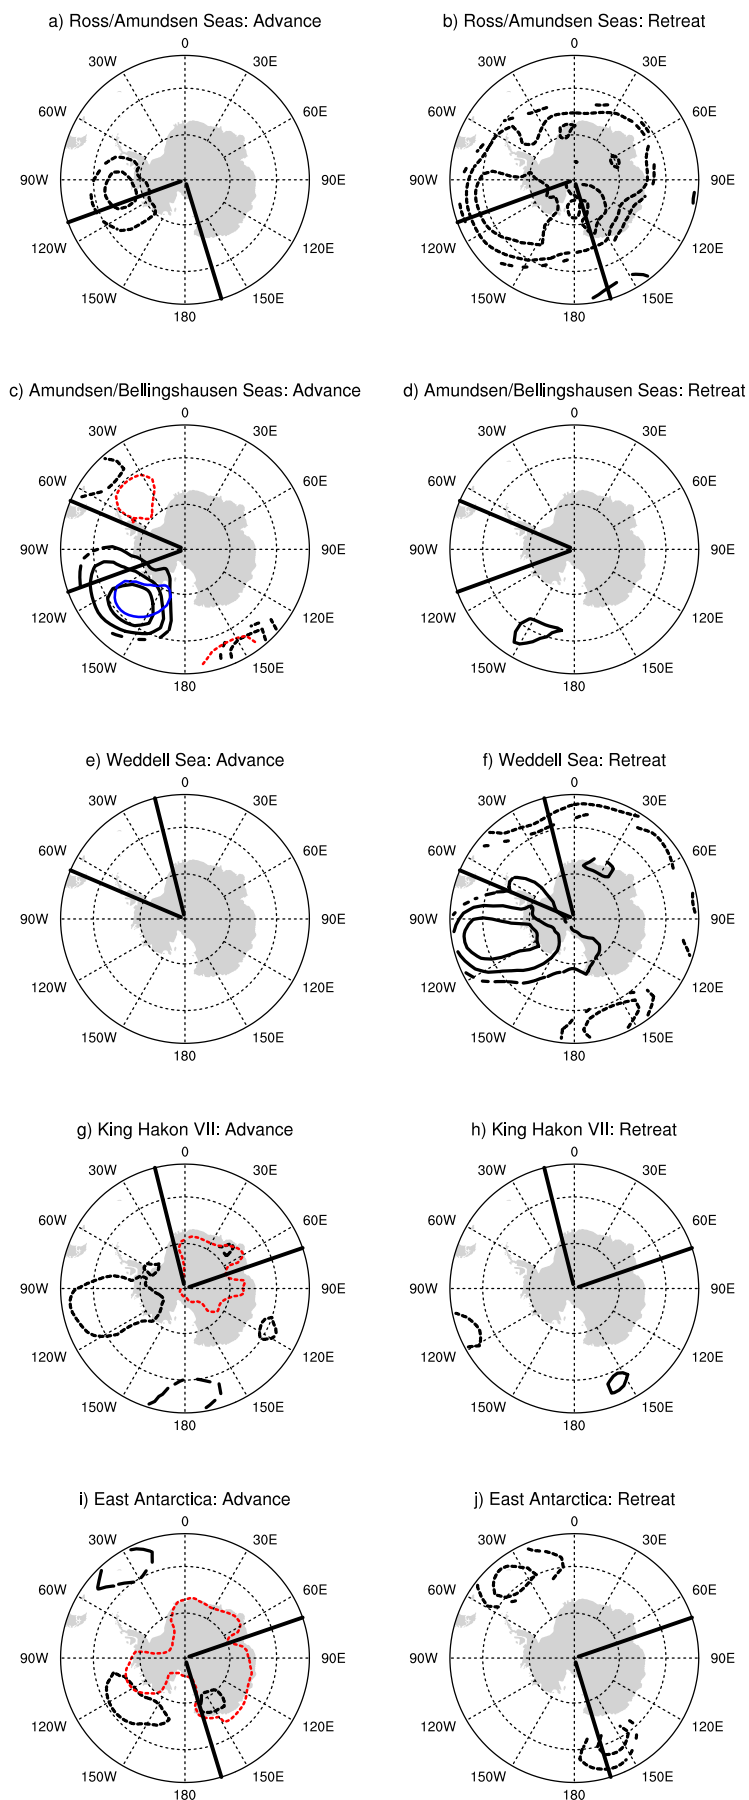

# IPSL-CM5A-LR

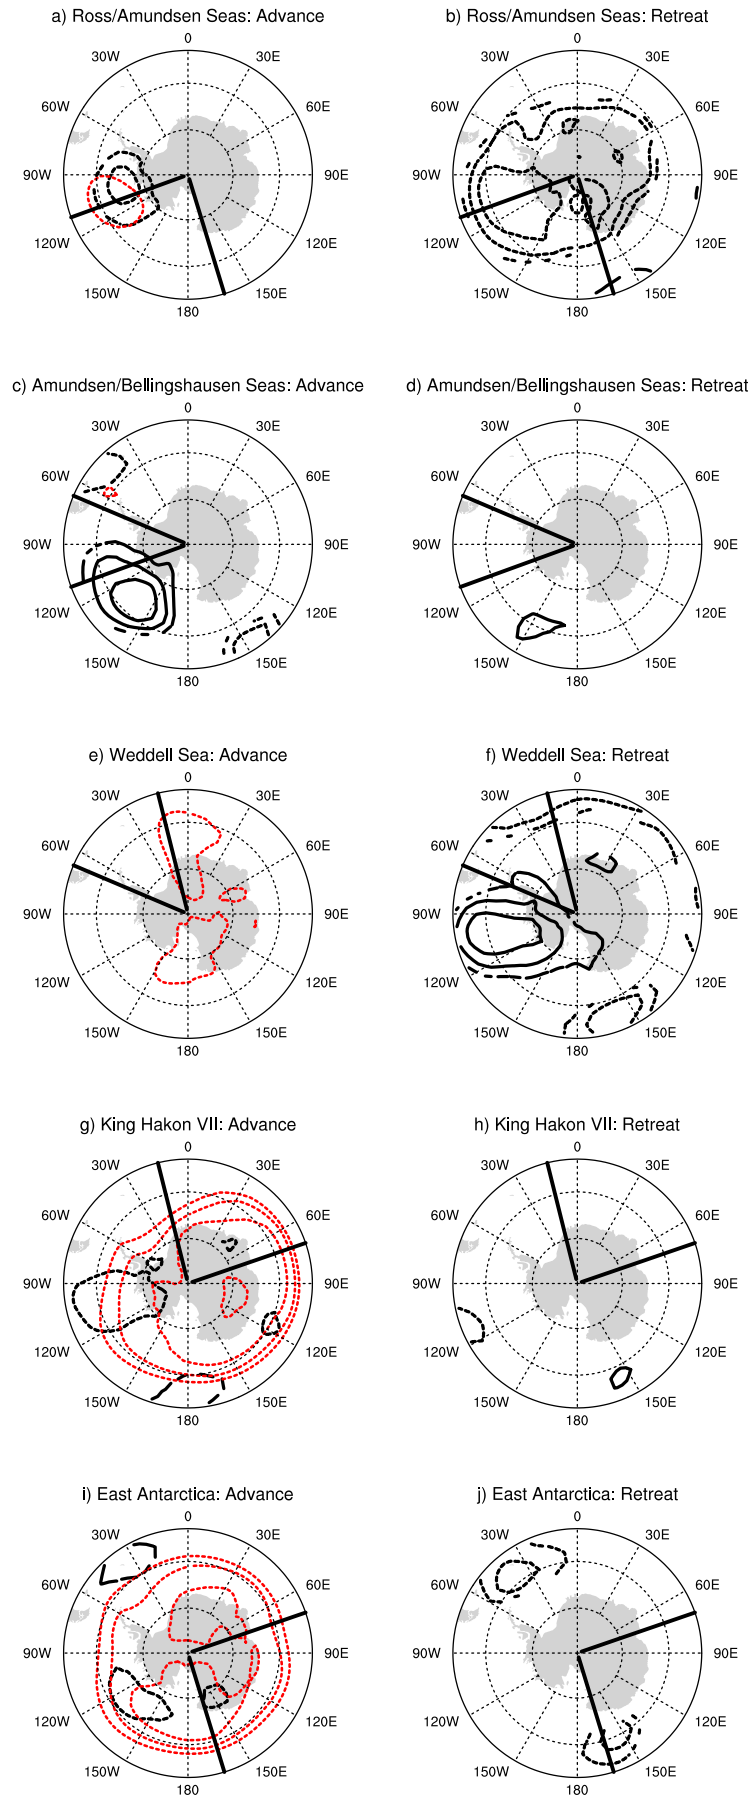

# IPSL-CM5A-MR

a) Ross/Amundsen Seas: Advance

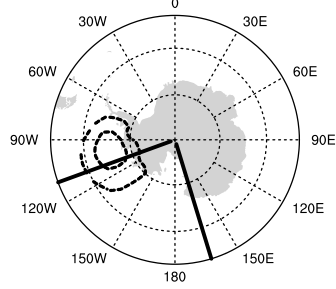

b) Ross/Amundsen Seas: Retreat



c) Amundsen/Bellingshausen Seas: Advance

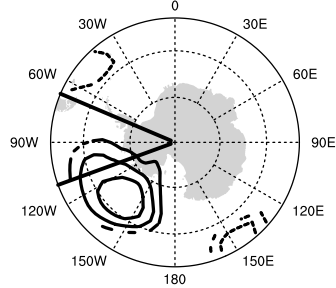

d) Amundsen/Bellingshausen Seas: Retreat



e) Weddell Sea: Advance

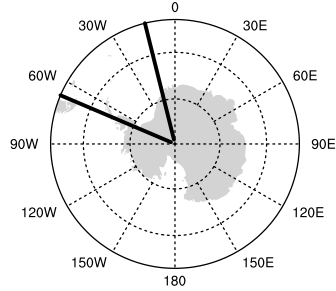

f) Weddell Sea: Retreat



g) King Hakon VII: Advance

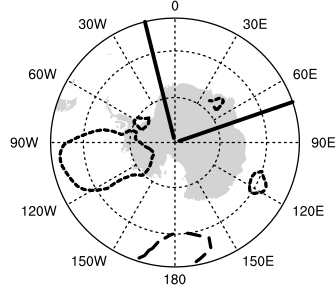

h) King Hakon VII: Retreat



i) East Antarctica: Advance

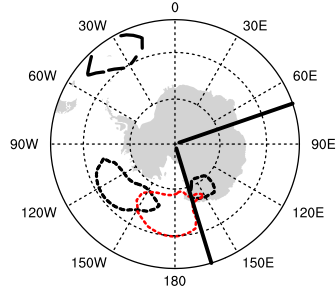

j) East Antarctica: Retreat



# MIROC5

a) Ross/Amundsen Seas: Advance



b) Ross/Amundsen Seas: Retreat



c) Amundsen/Bellingshausen Seas: Advance

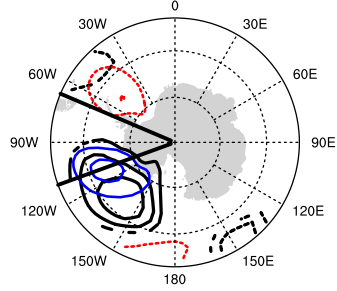

d) Amundsen/Bellingshausen Seas: Retreat



e) Weddell Sea: Advance



f) Weddell Sea: Retreat



g) King Hakon VII: Advance

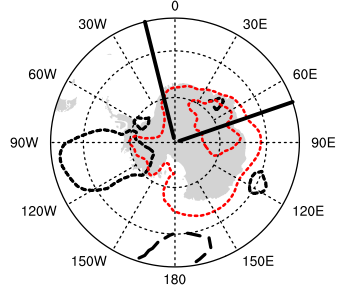

h) King Hakon VII: Retreat



i) East Antarctica: Advance

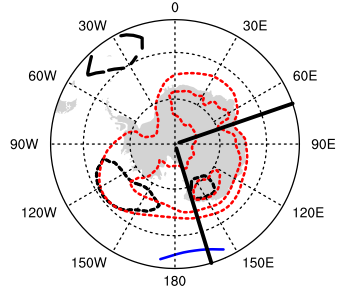

j) East Antarctica: Retreat



# MPI-ESM-LR

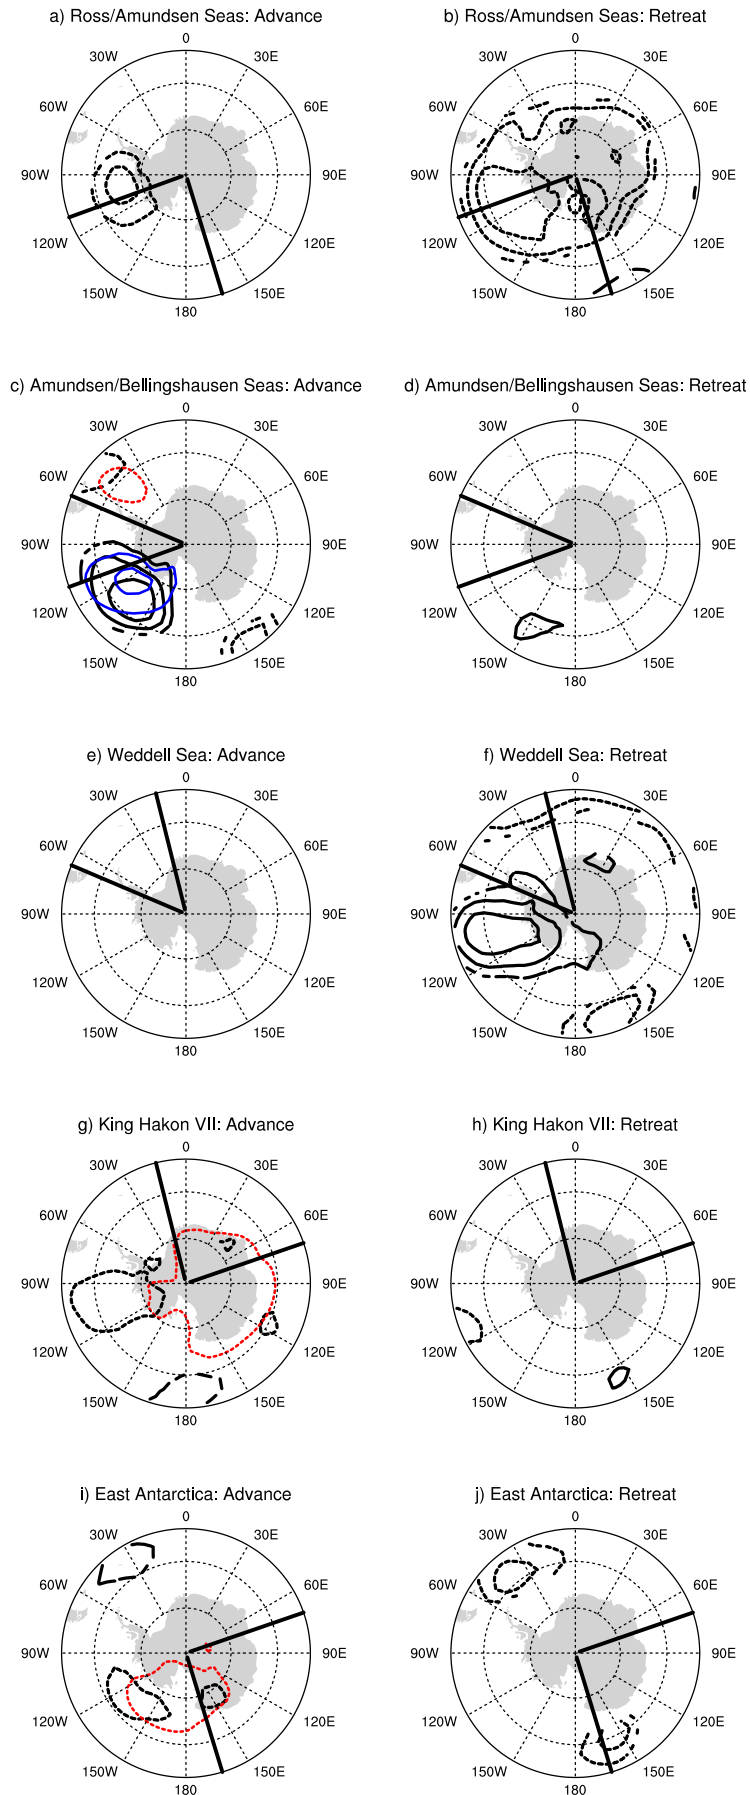

# MPI-ESM-MR

a) Ross/Amundsen Seas: Advance

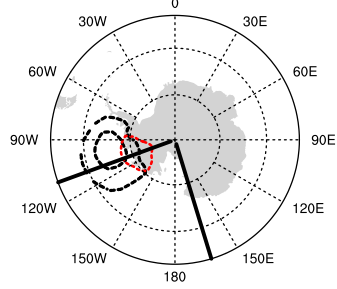

b) Ross/Amundsen Seas: Retreat



c) Amundsen/Bellingshausen Seas: Advance

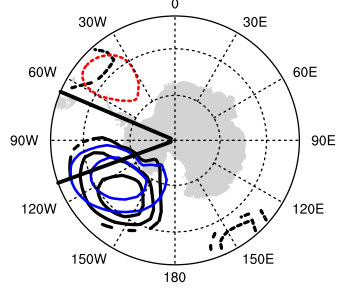

d) Amundsen/Bellingshausen Seas: Retreat

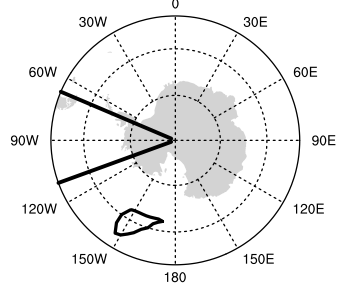

e) Weddell Sea: Advance

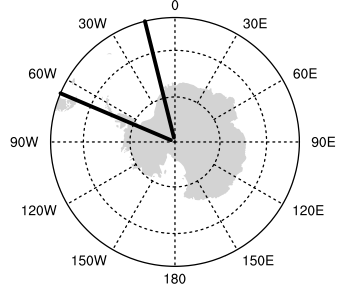

f) Weddell Sea: Retreat

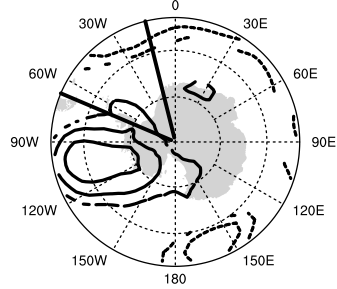

g) King Hakon VII: Advance

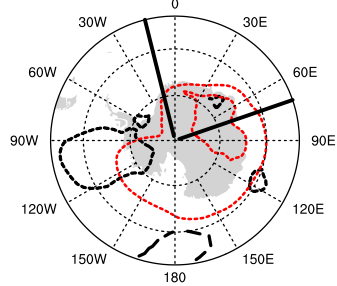

h) King Hakon VII: Retreat



i) East Antarctica: Advance

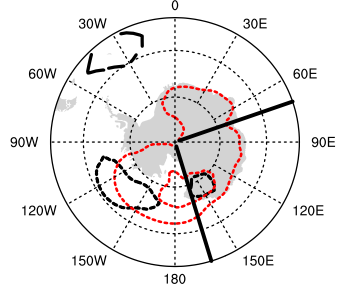

j) East Antarctica: Retreat



# MRI-CGCM3

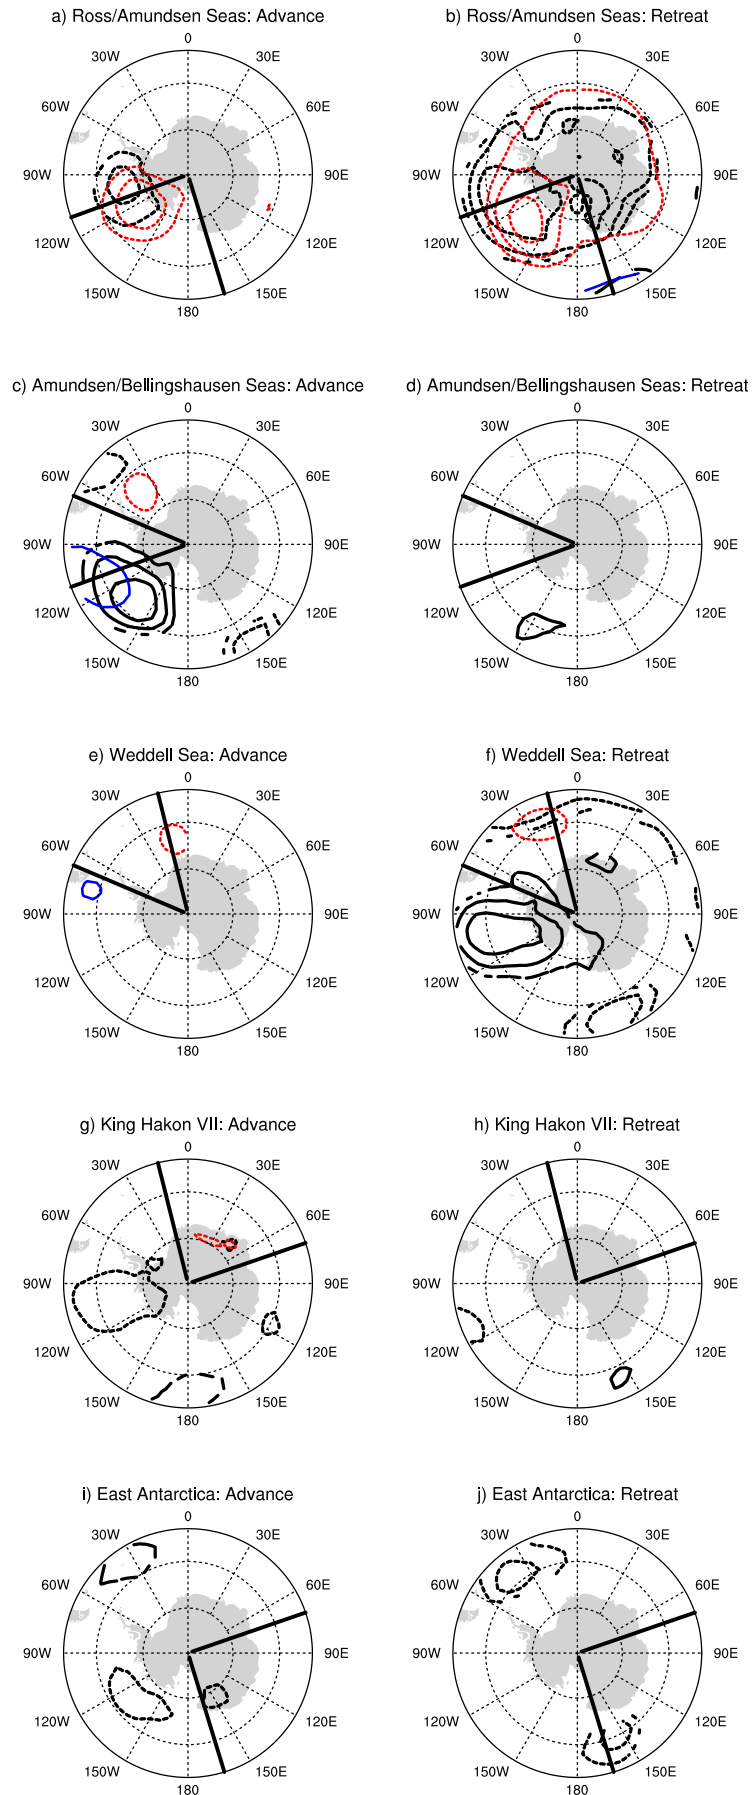

# NorESM1-M

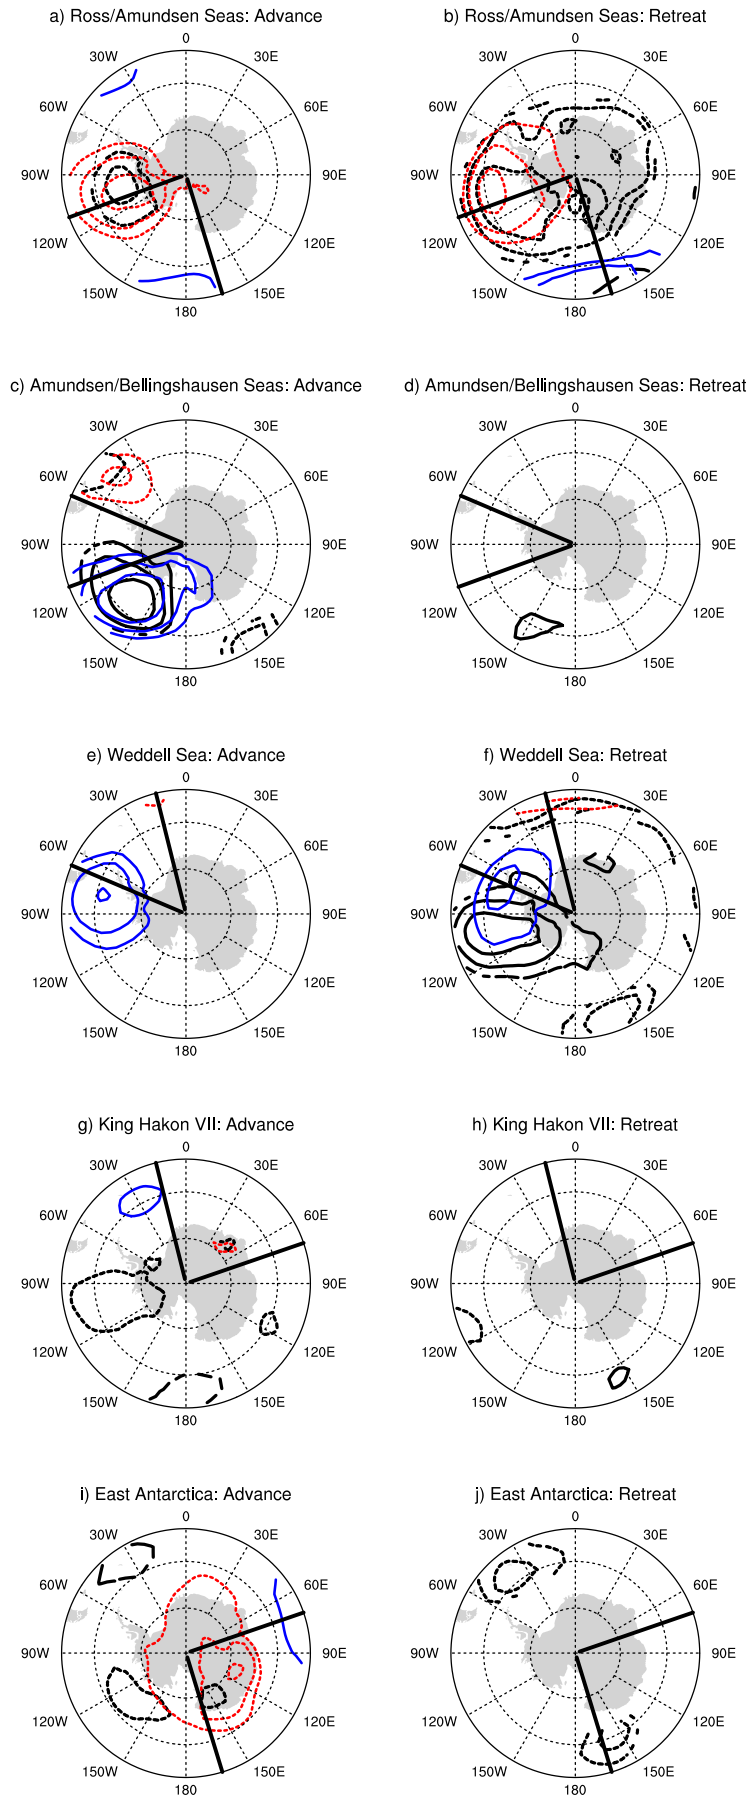

Supplement: Supplementary file 1 [file tc-11-789-2017-supplement.zip]
