# Supplementary material for: Interactions between Antarctic sea ice and large-scale atmospheric modes in CMIP5 models
Source: Copernicus journal article supplement (doi:10.5194/tc-11-789-2017), 2017-03-24
Supplement: Supplementary file 3 [file tc-11-789-2017-supplement.zip]

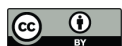

## *Supplement of*

# **Interactions between Antarctic sea ice and large-scale atmospheric modes in CMIP5 models**

**S. Schroeter et al.**

*Correspondence to:* Serena Schroeter ([serena.schroeter@utas.edu.au](mailto:serena.schroeter@utas.edu.au))

- [tc-11-789-2017-supplement-title-page.pdf](#)
- [FigureS1.pdf](#)
- [FigureS2.pdf](#)
- [FigureS3.pdf](#)

The copyright of individual parts of the supplement might differ from the CC-BY 3.0 licence.
