# Supplementary figures and images for: Interactions between Antarctic sea ice and large-scale atmospheric modes in CMIP5 models
Source: Copernicus journal article supplement (doi:10.5194/tc-11-789-2017), 2017-03-24

(a) EOF 1: Advance 36%

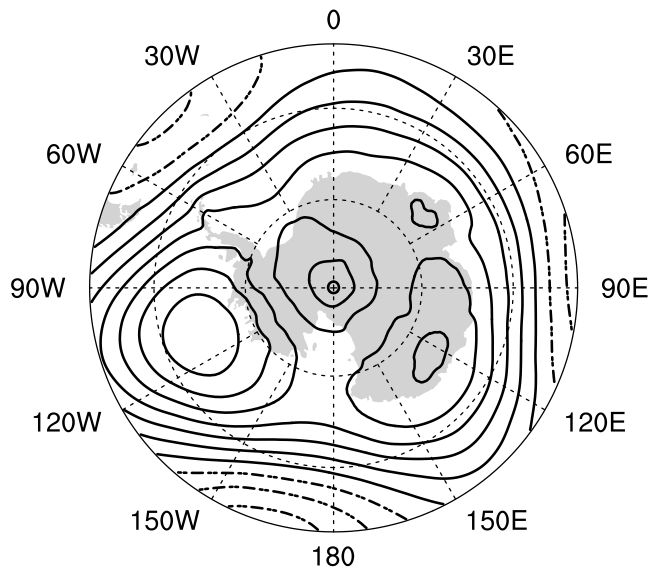

(b) EOF 1: Retreat 43%

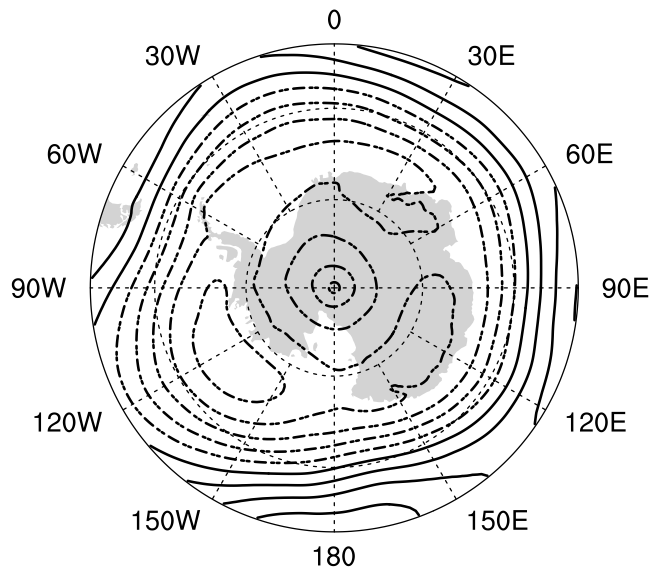

(c) EOF 2+3: Advance 27%

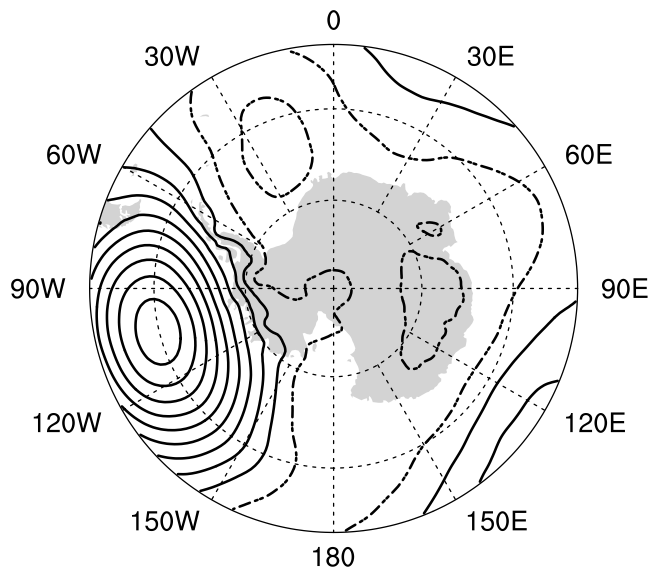

(d) EOF 2+3: Retreat 20%

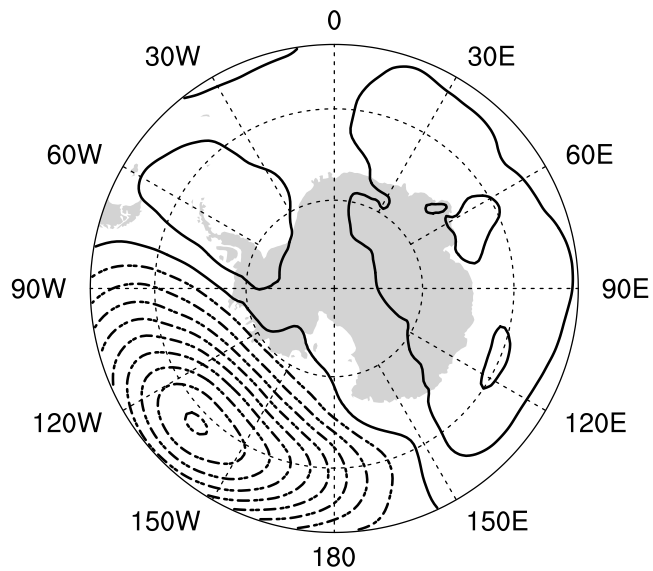

Supplement: Supplementary file 4 [file tc-11-789-2017-supplement.zip]
